# Supplementary material
Source: PubMed Central journal article supplement (PMC5501486)

## **Supplementary Material**

for

### **Aryne cycloaddition reactions of benzodioxasilines as aryne precursors generated by catalytic reductive *ortho*-C–H silylation of phenols with traceless acetal directing groups**

Parham Asgari, Udaya Sree Dakarapu, Hiep H. Nguyen, and Junha Jeon\*

*Department of Chemistry and Biochemistry, University of Texas at Arlington*

*Arlington, TX 76019*

*\*jjeon@uta.edu*

#### **NMR Spectra**

Copies of  $^1\text{H}$  and  $^{13}\text{C}$  NMR Spectra of Each Isolated Compound

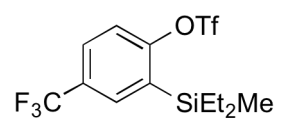**5d**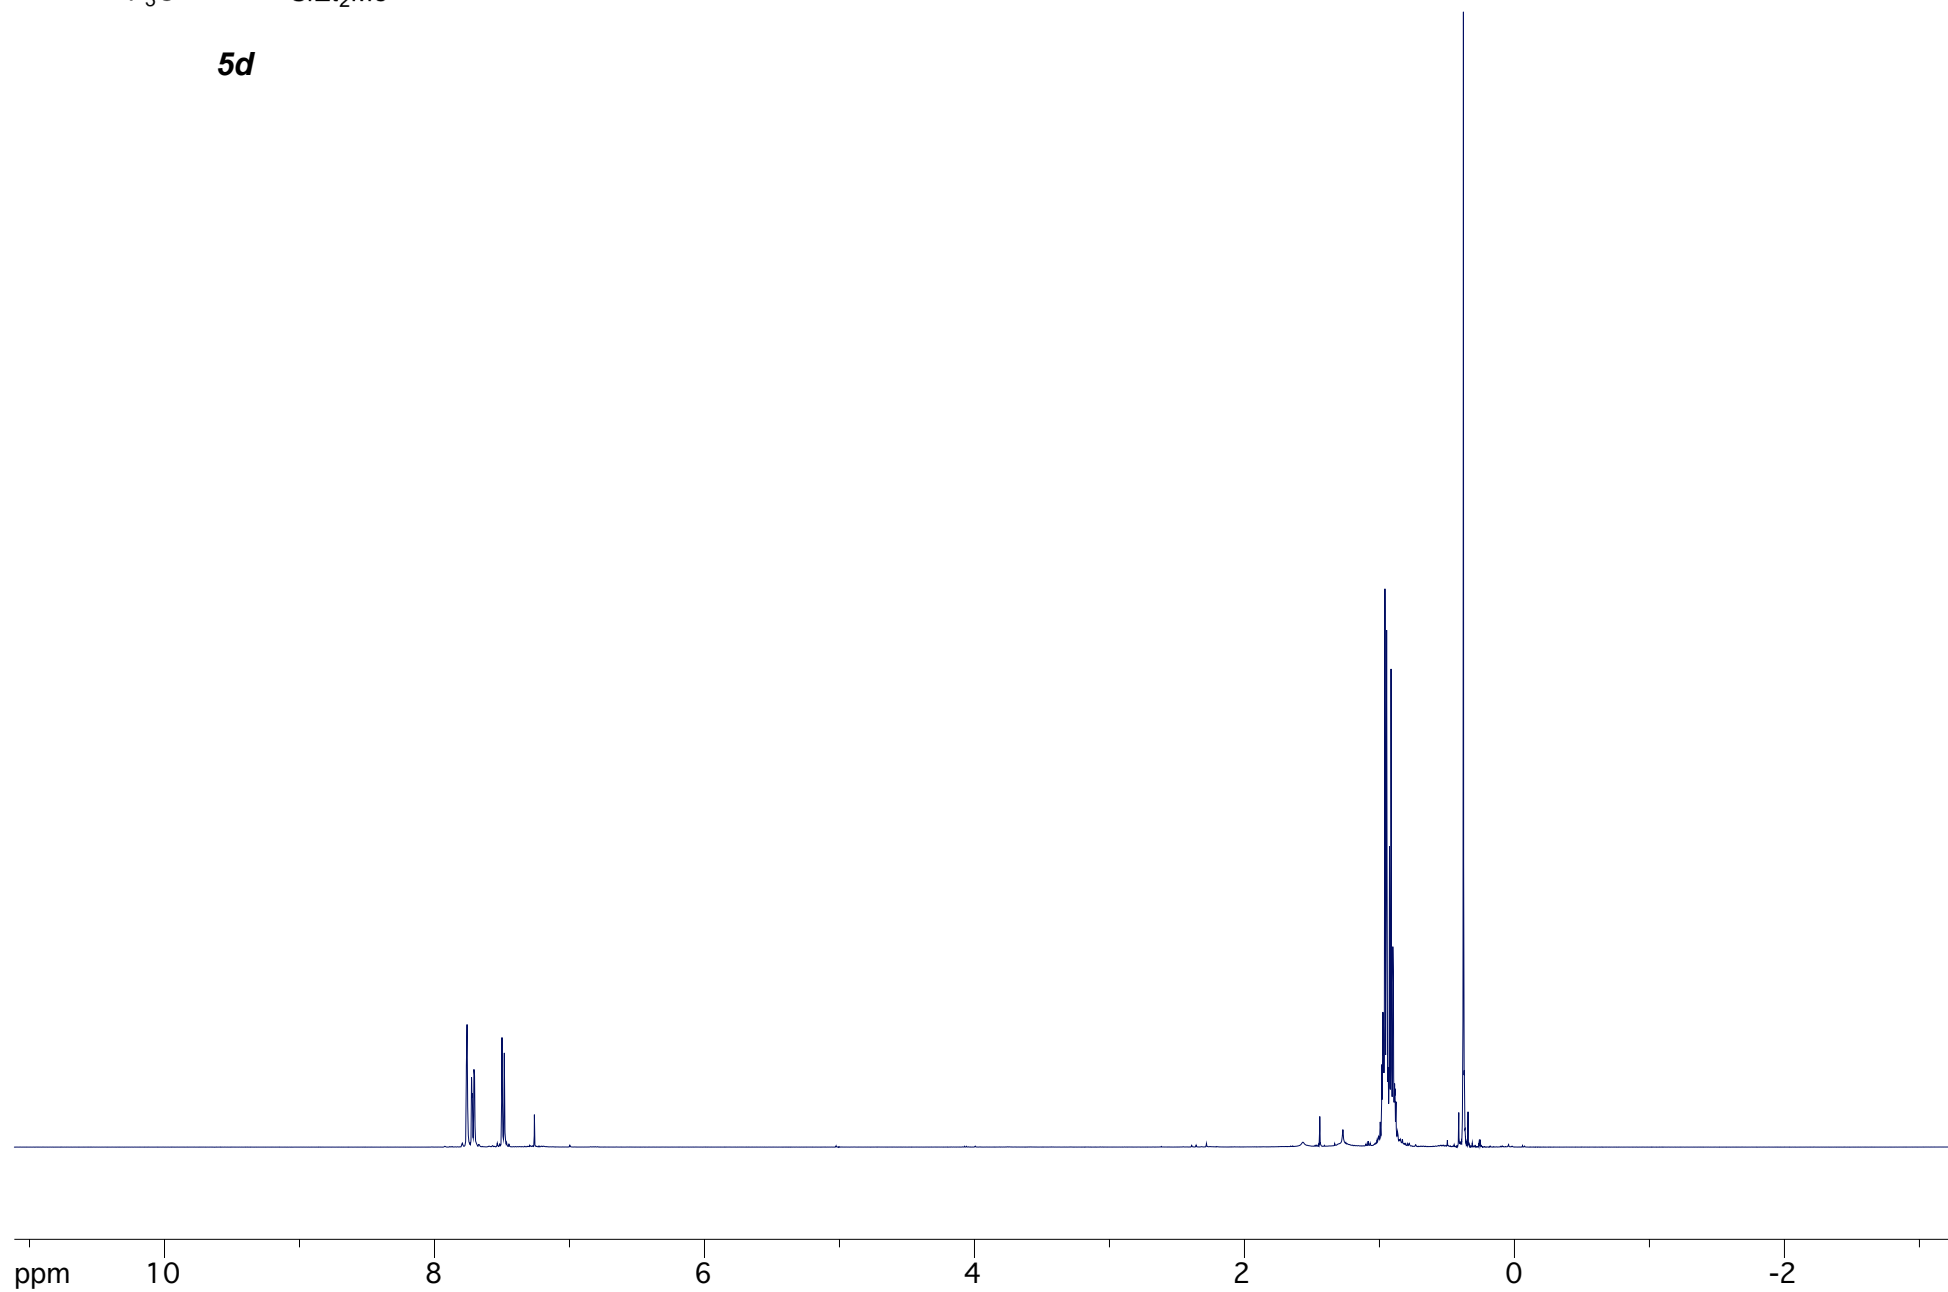

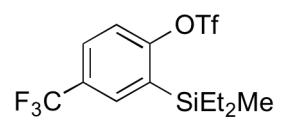**5d**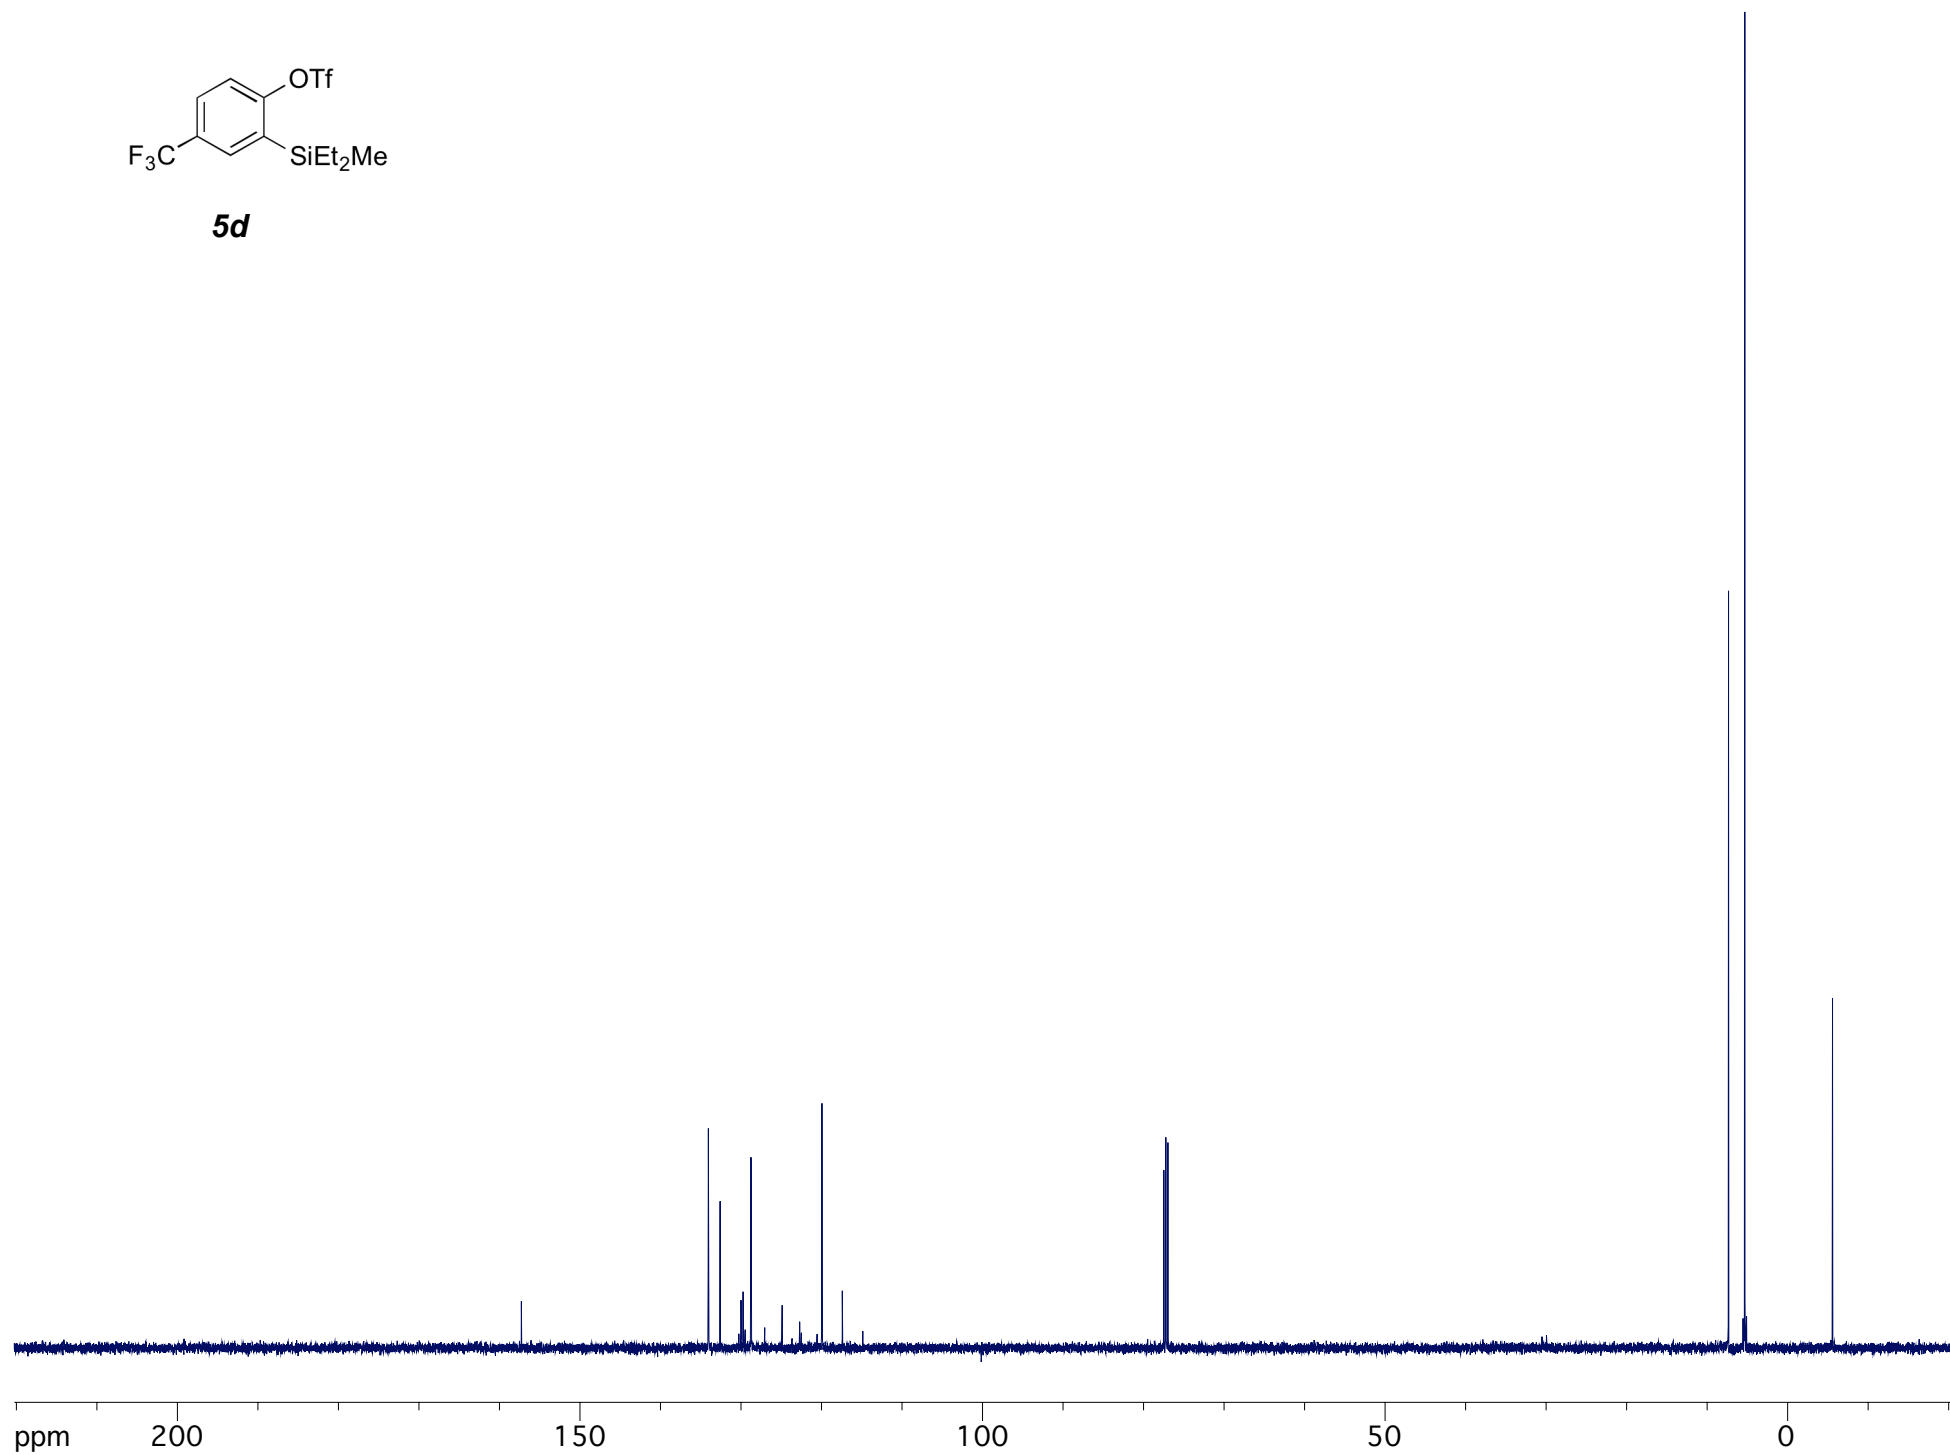

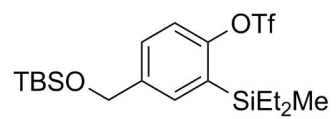**5e**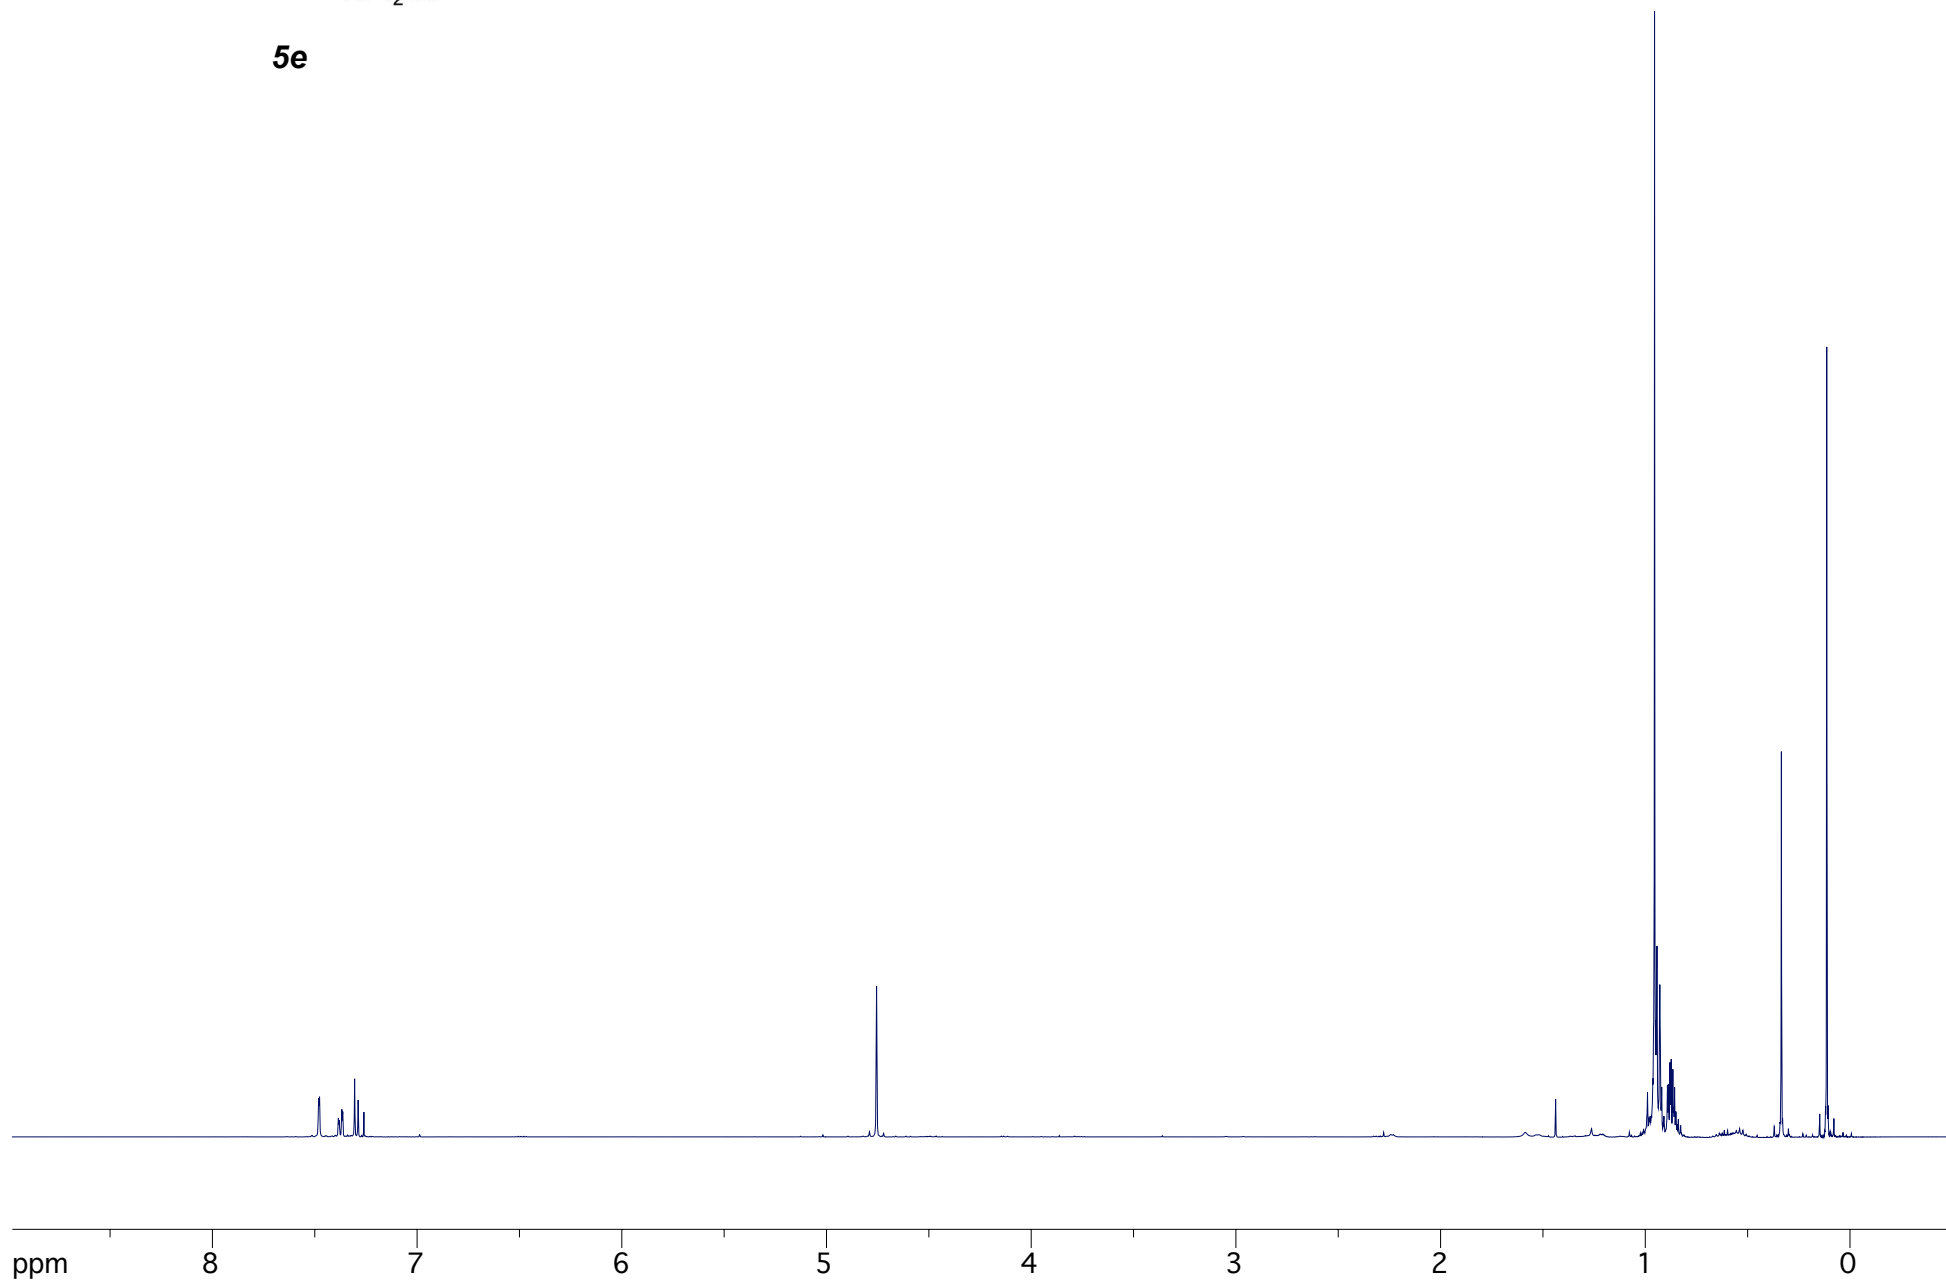

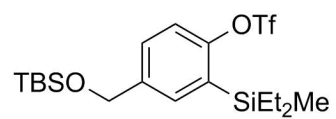**5e**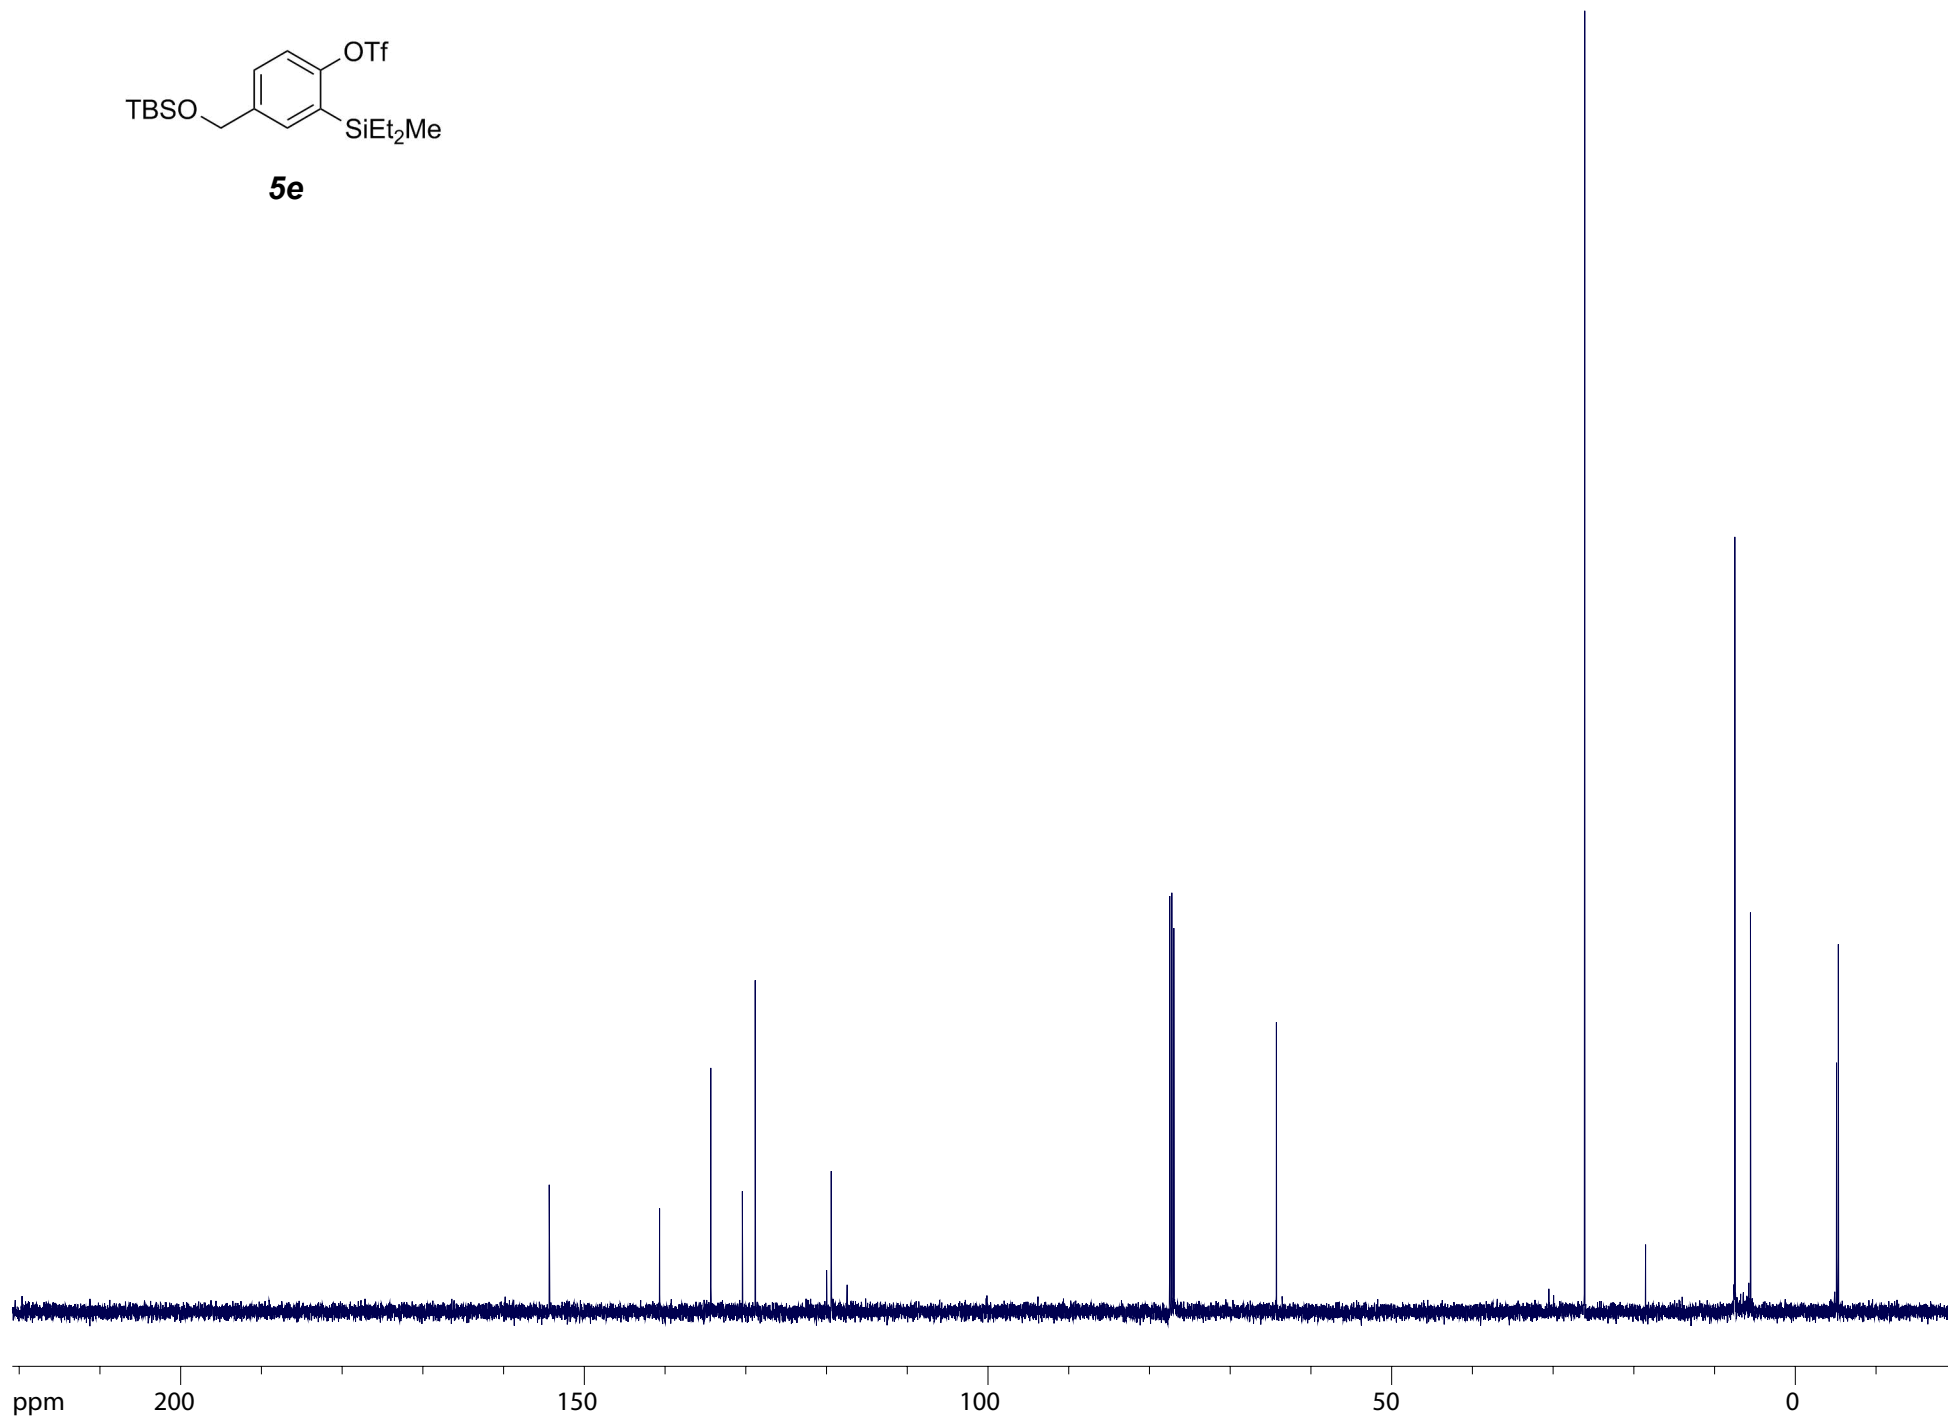

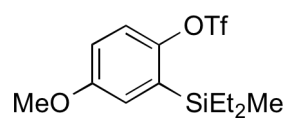**5f**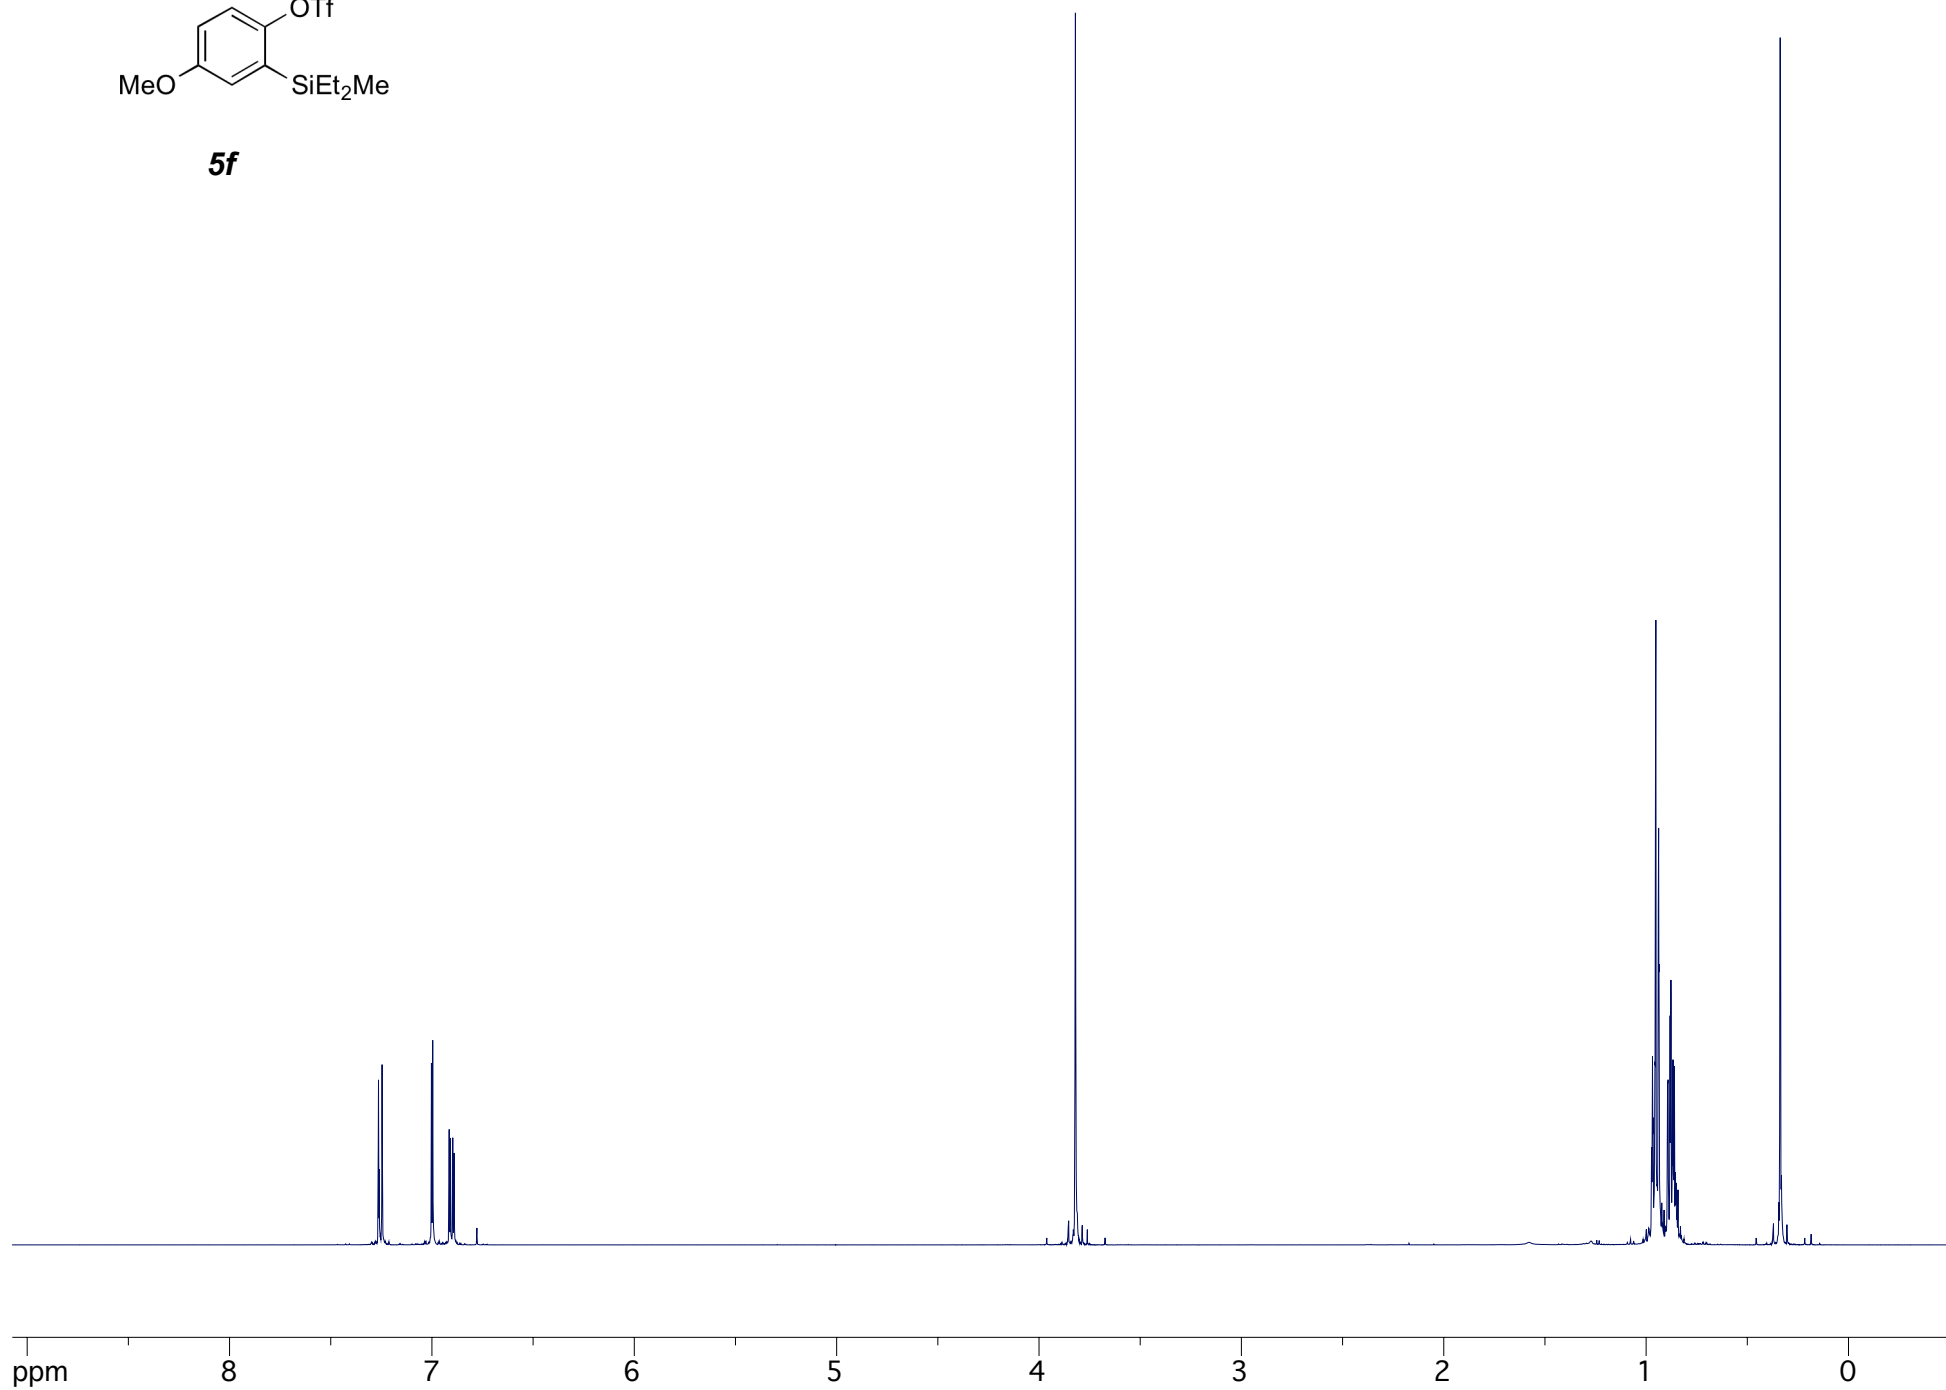

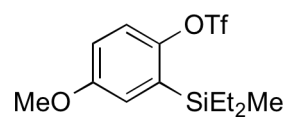**5f**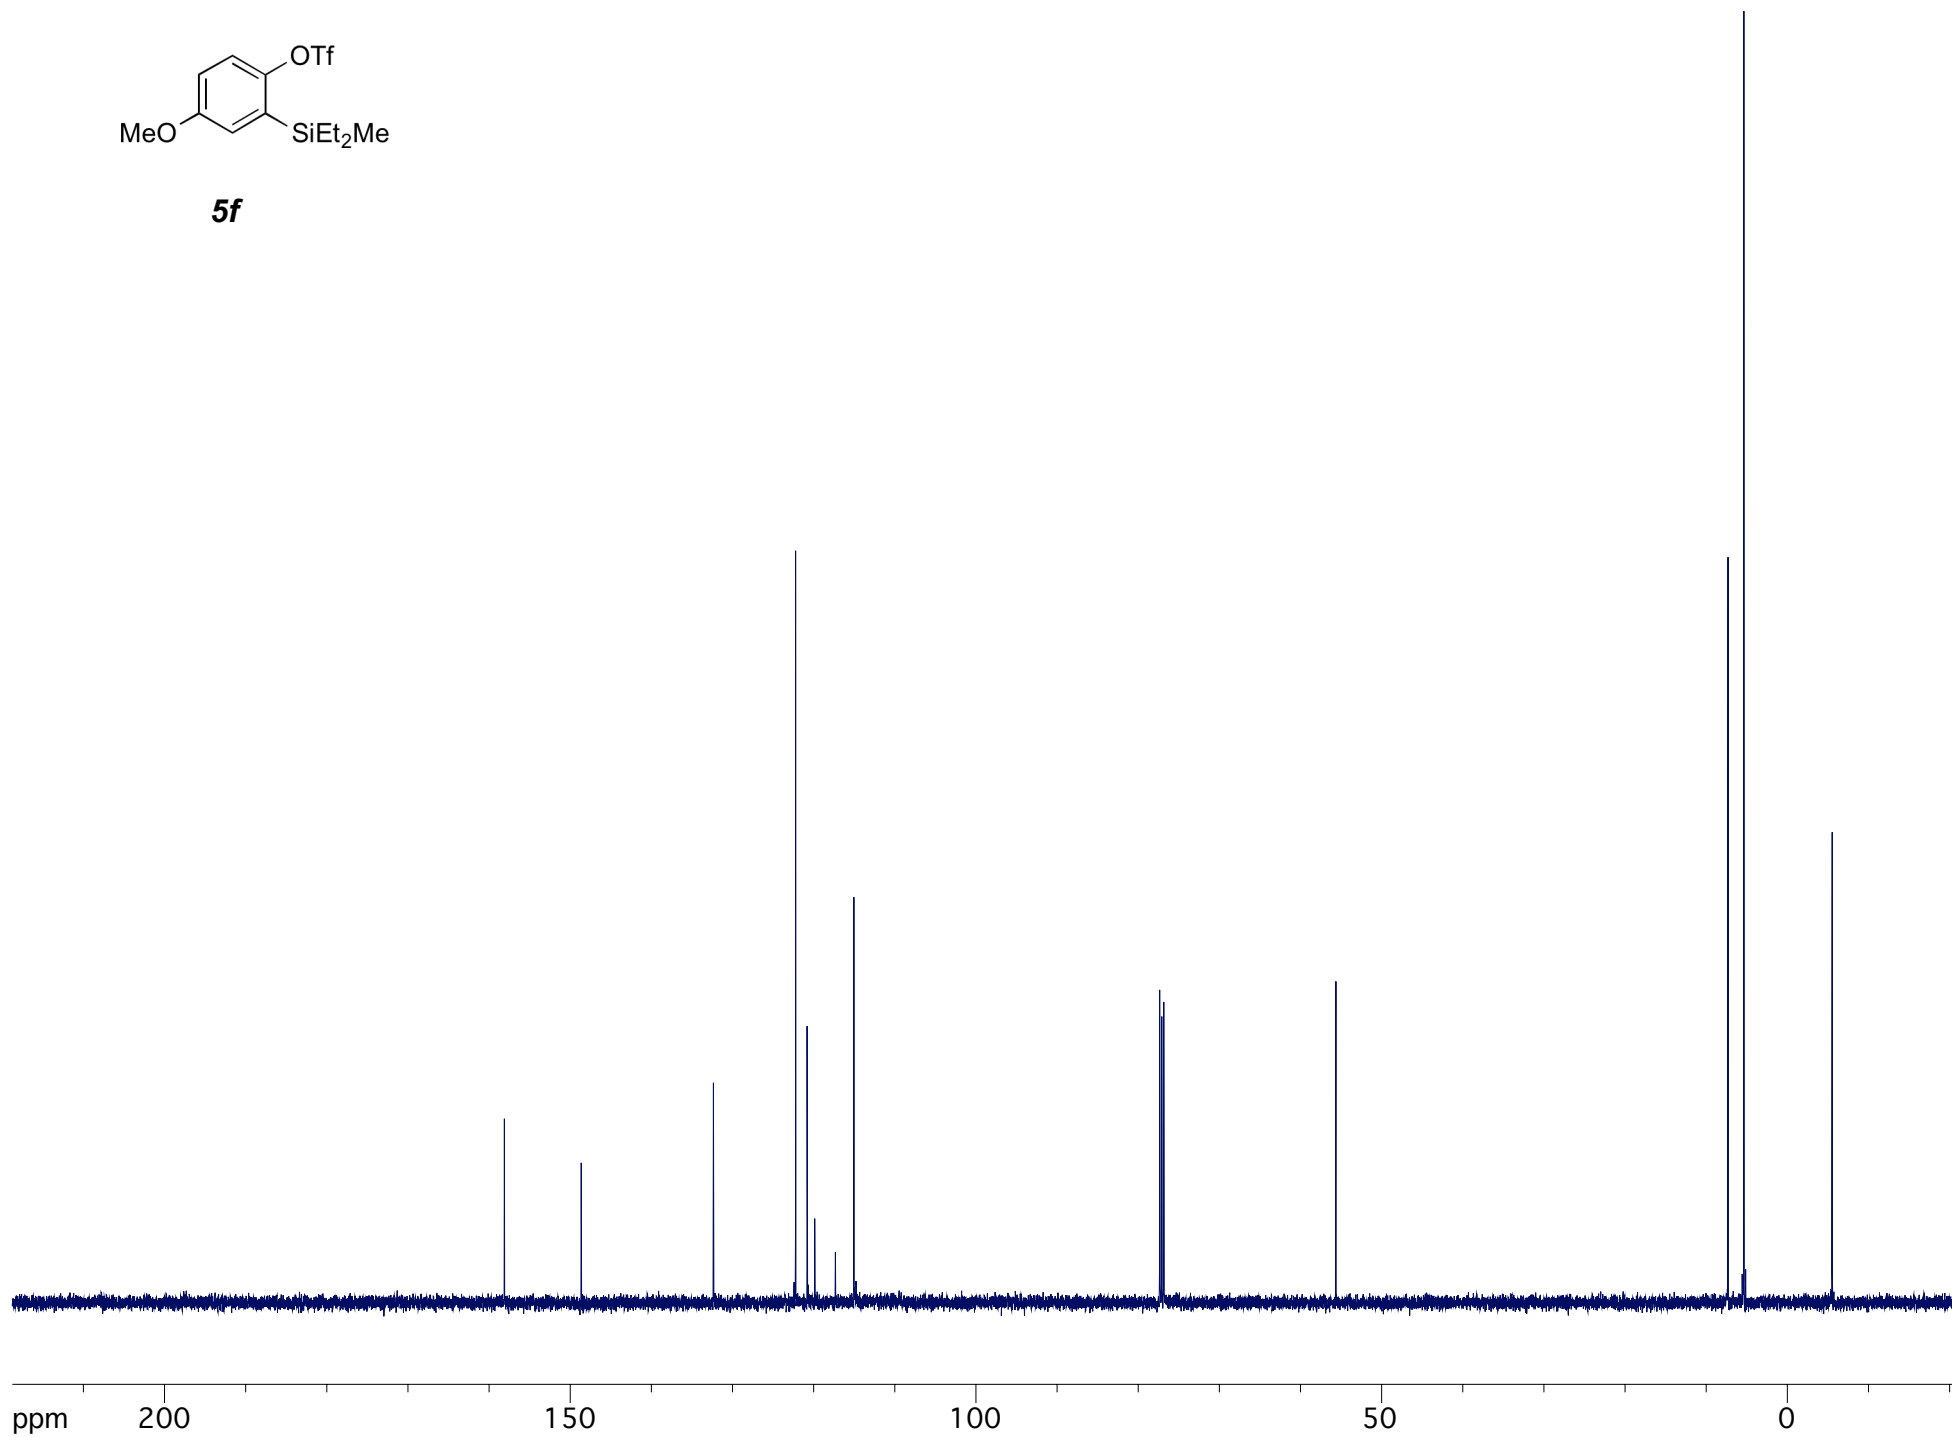

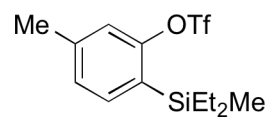**5g**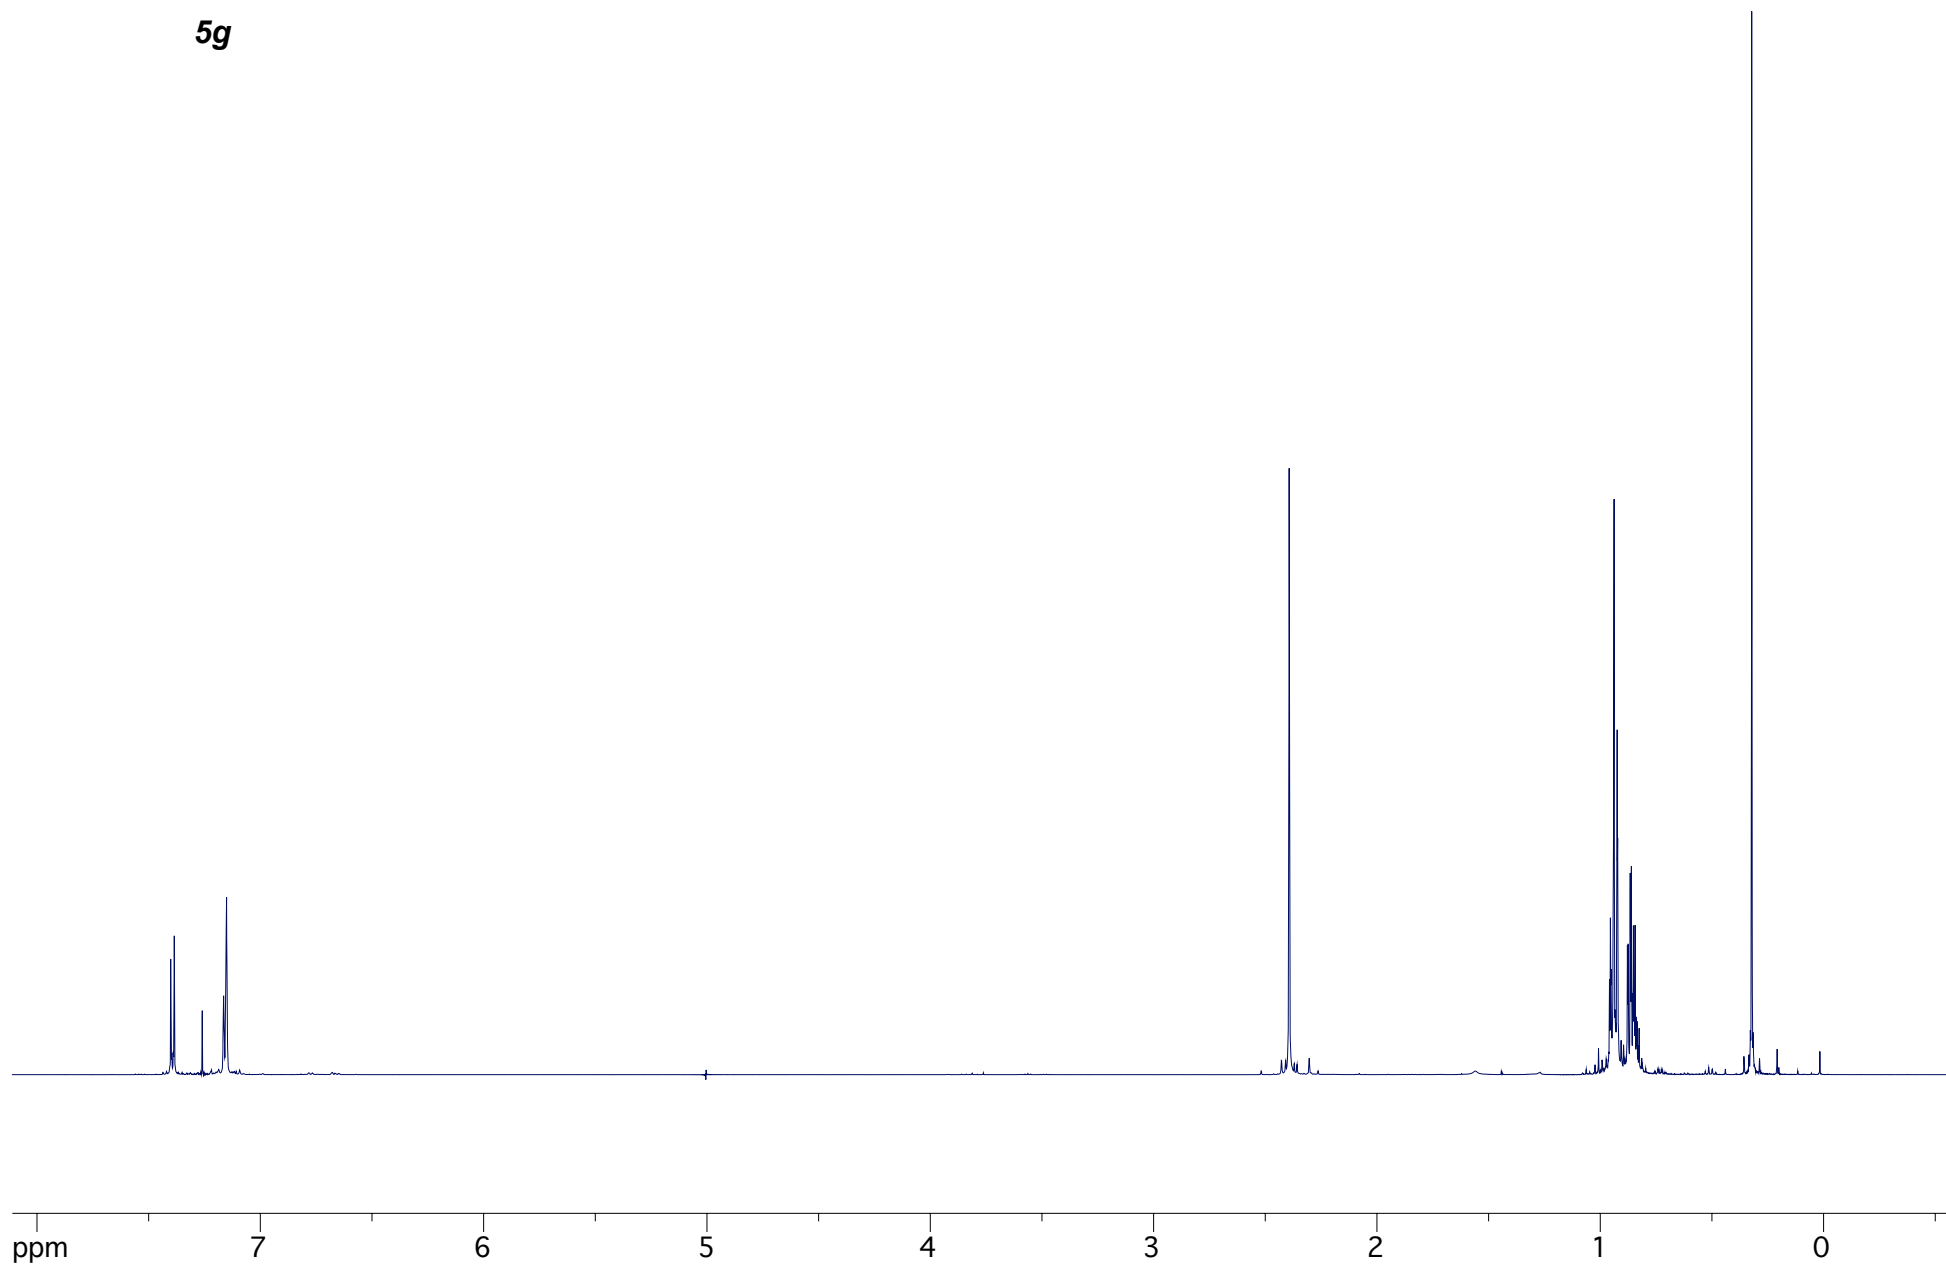



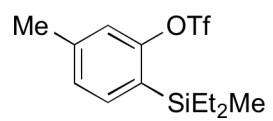**5g**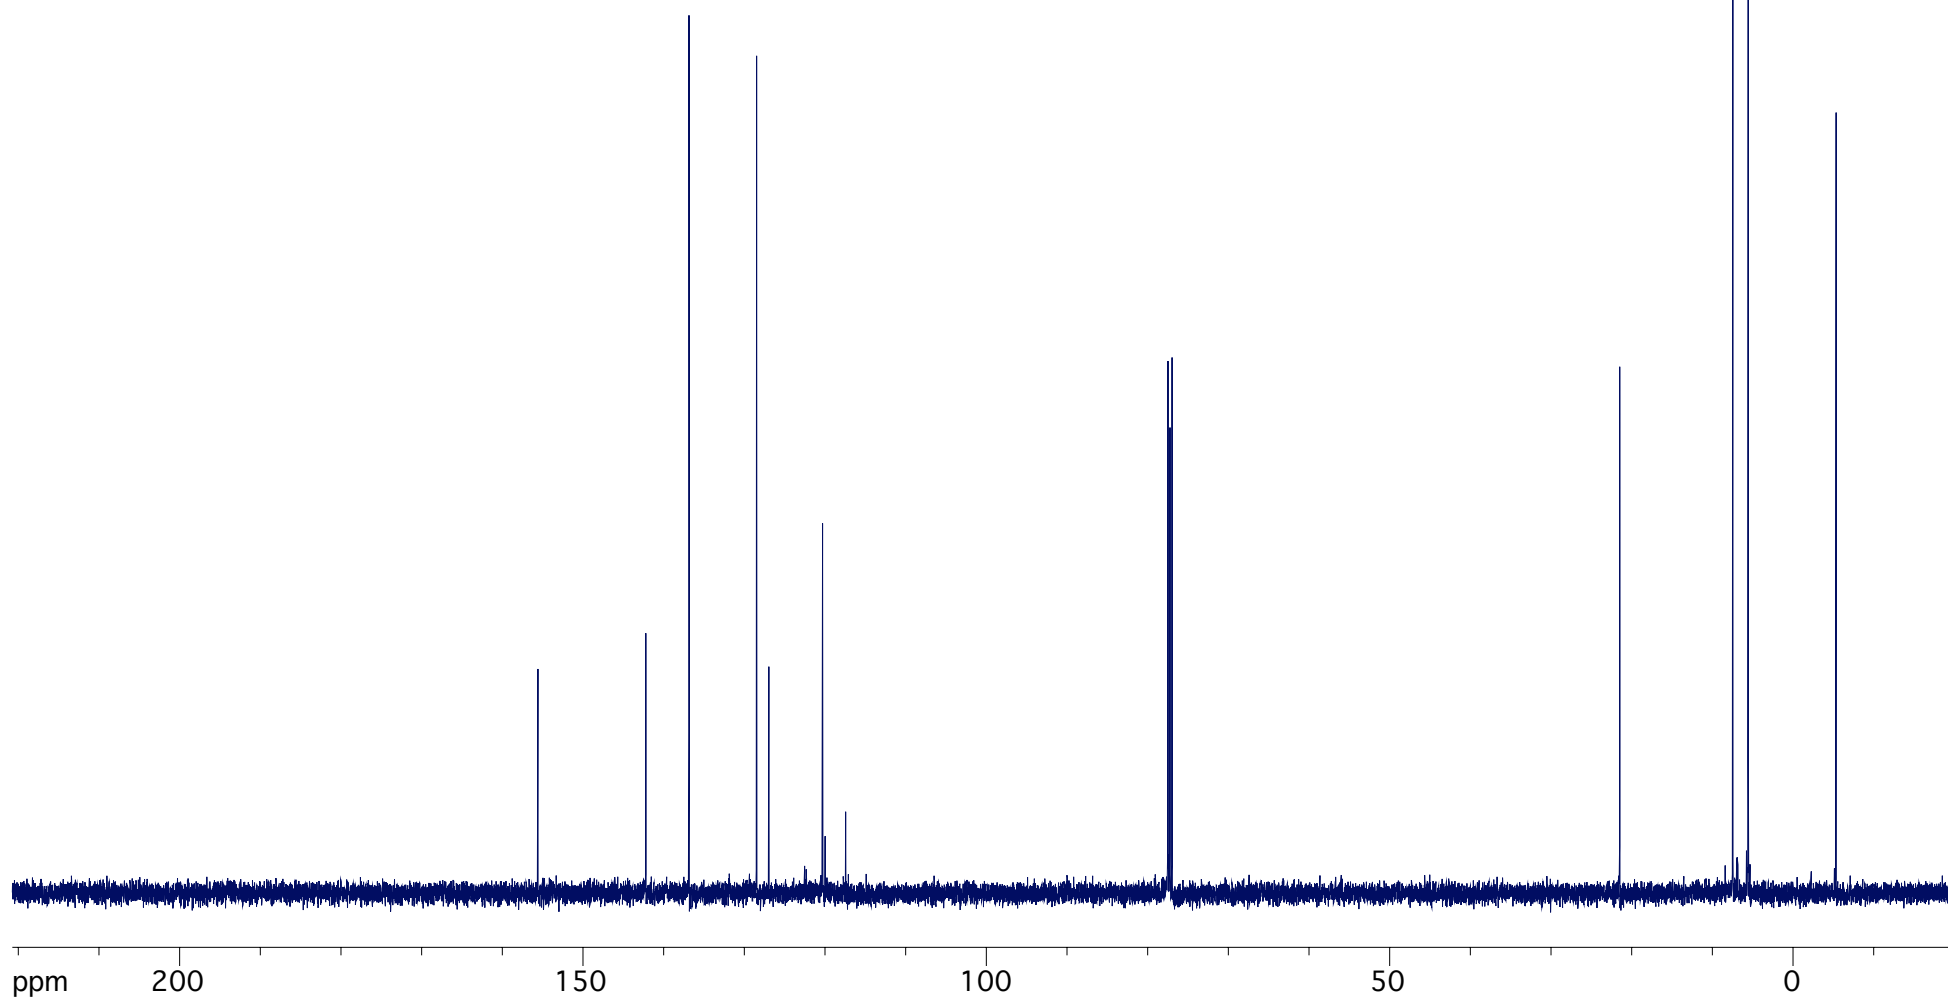

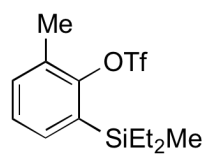**5h**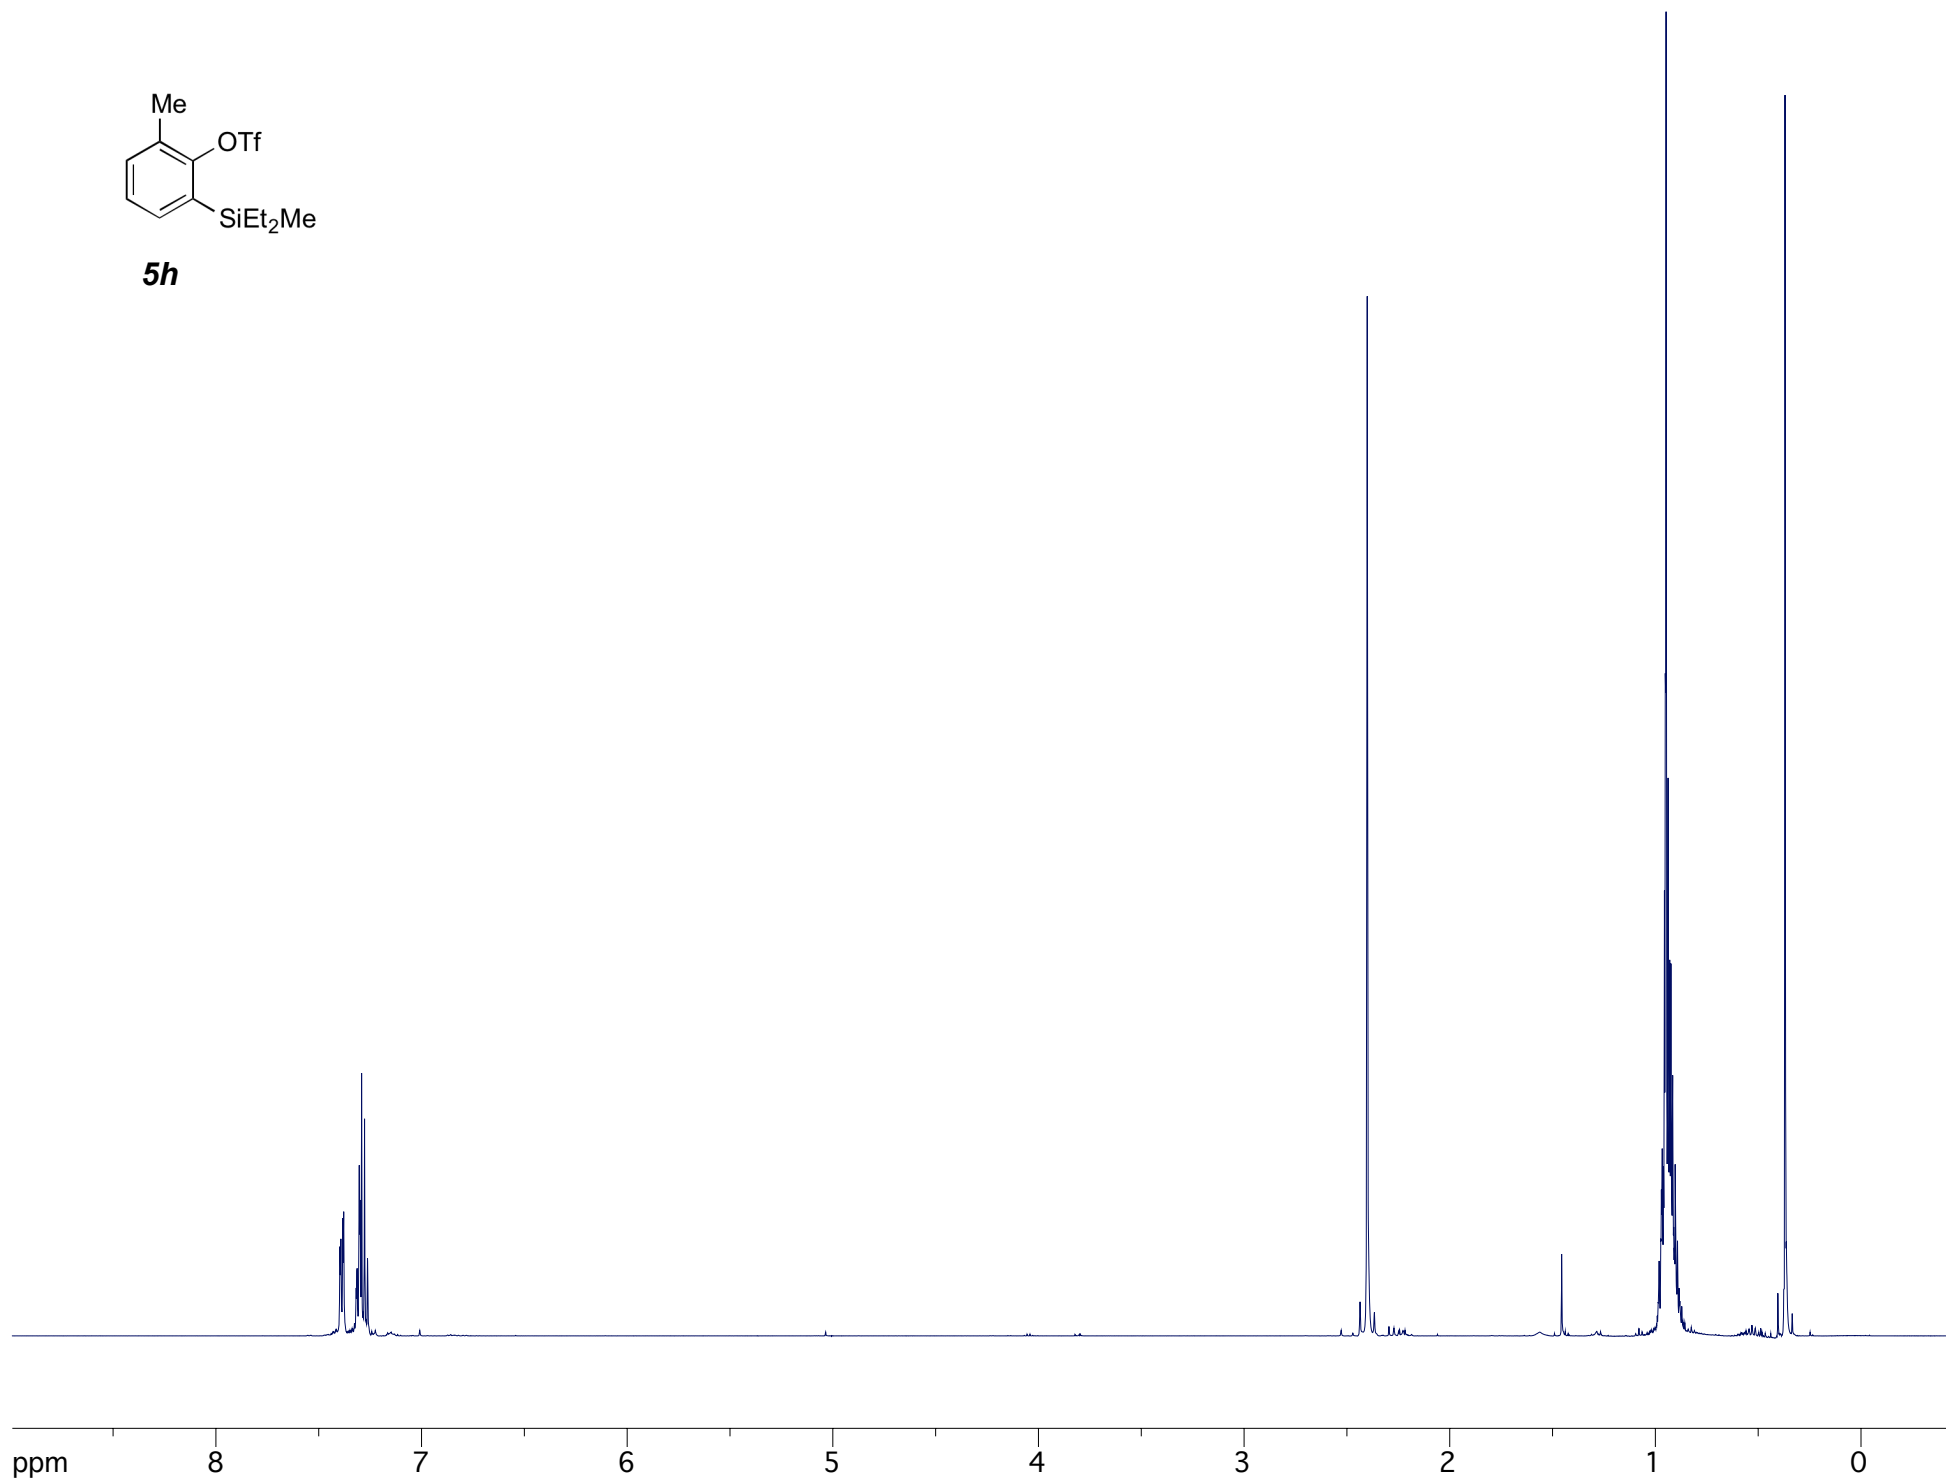

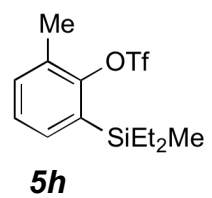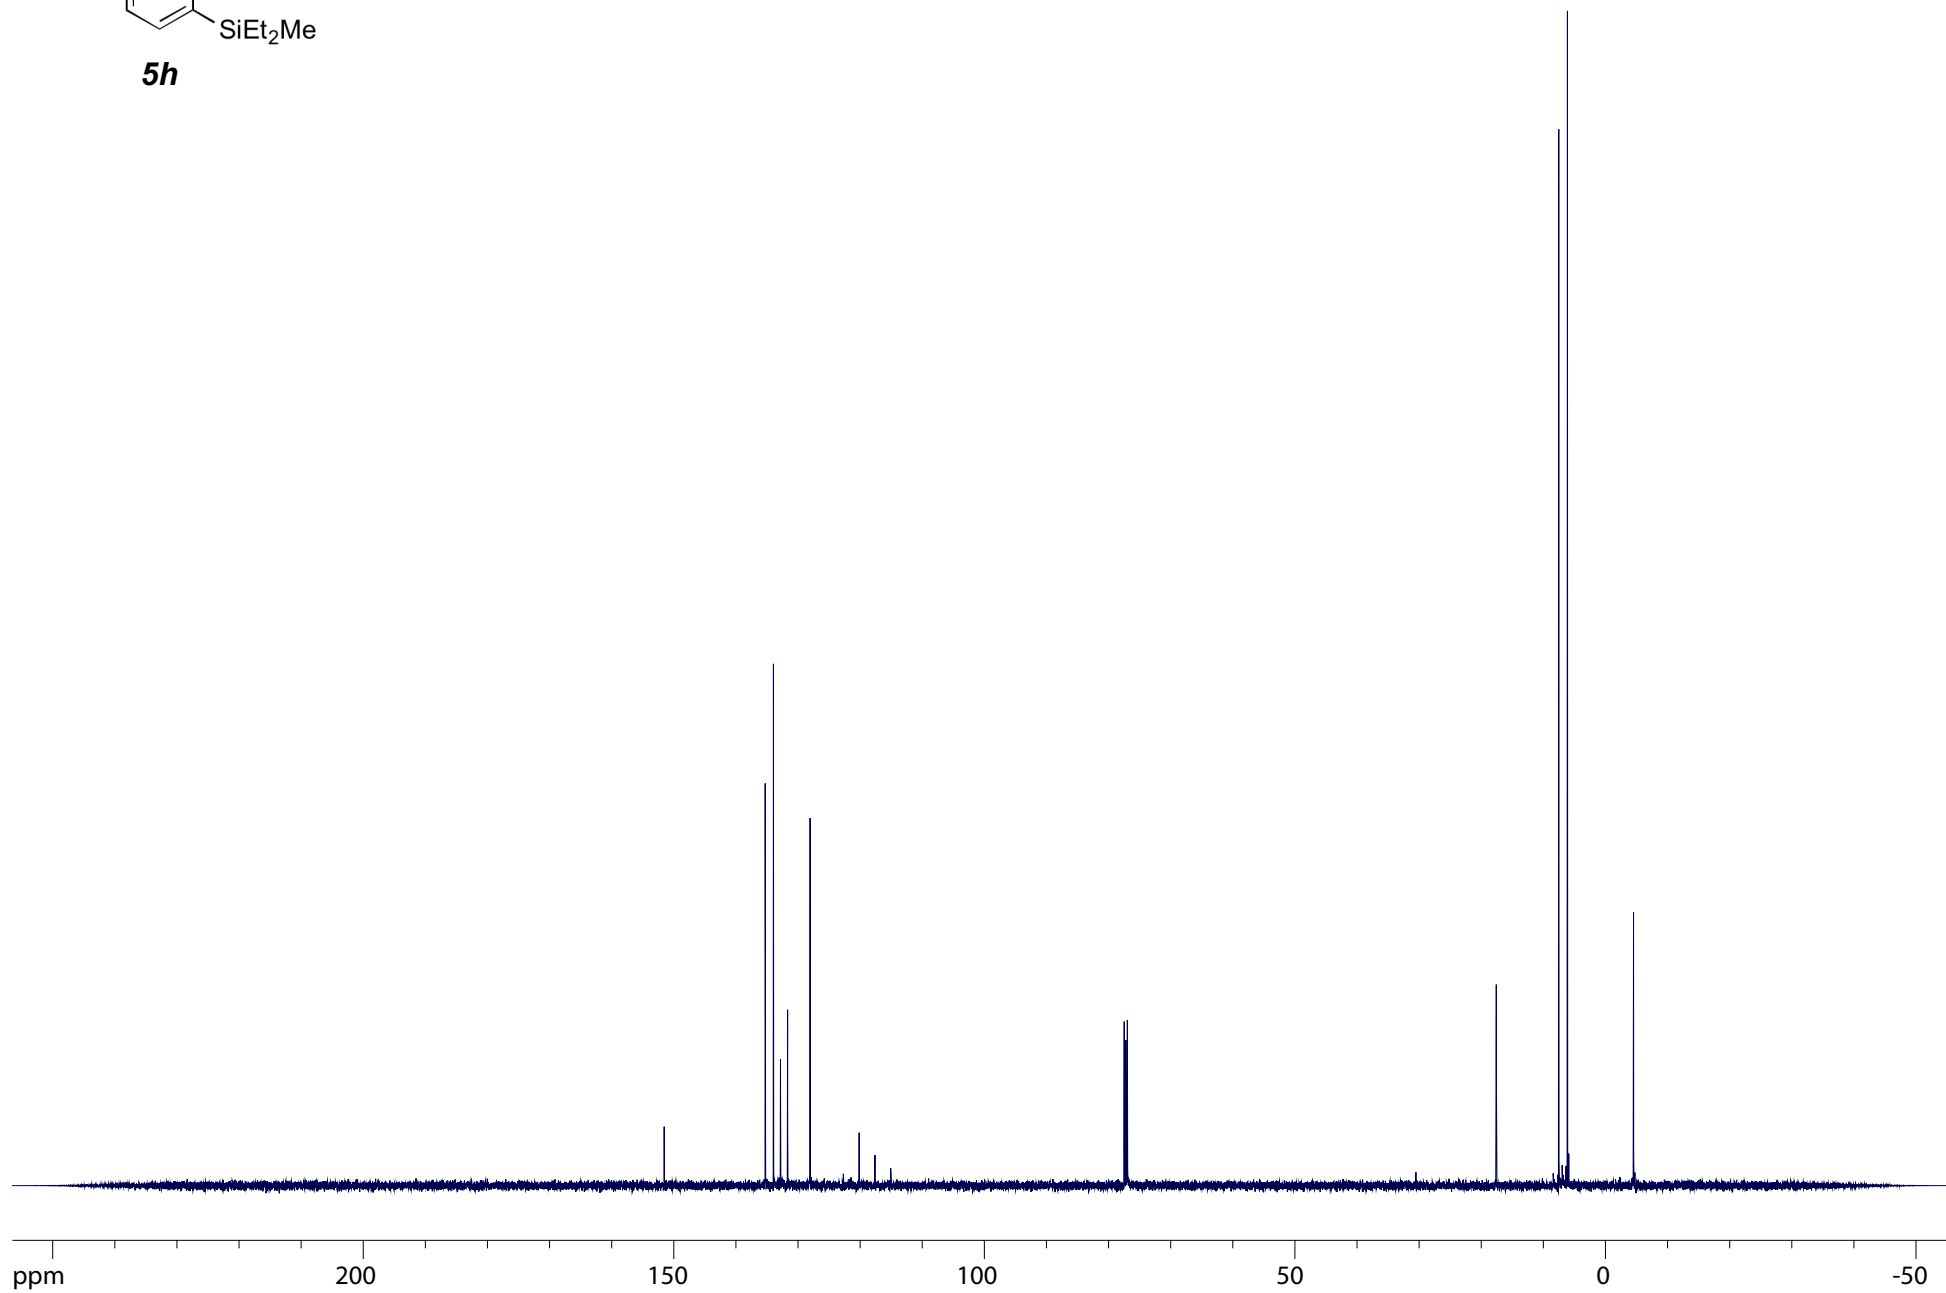

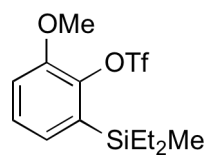**5i**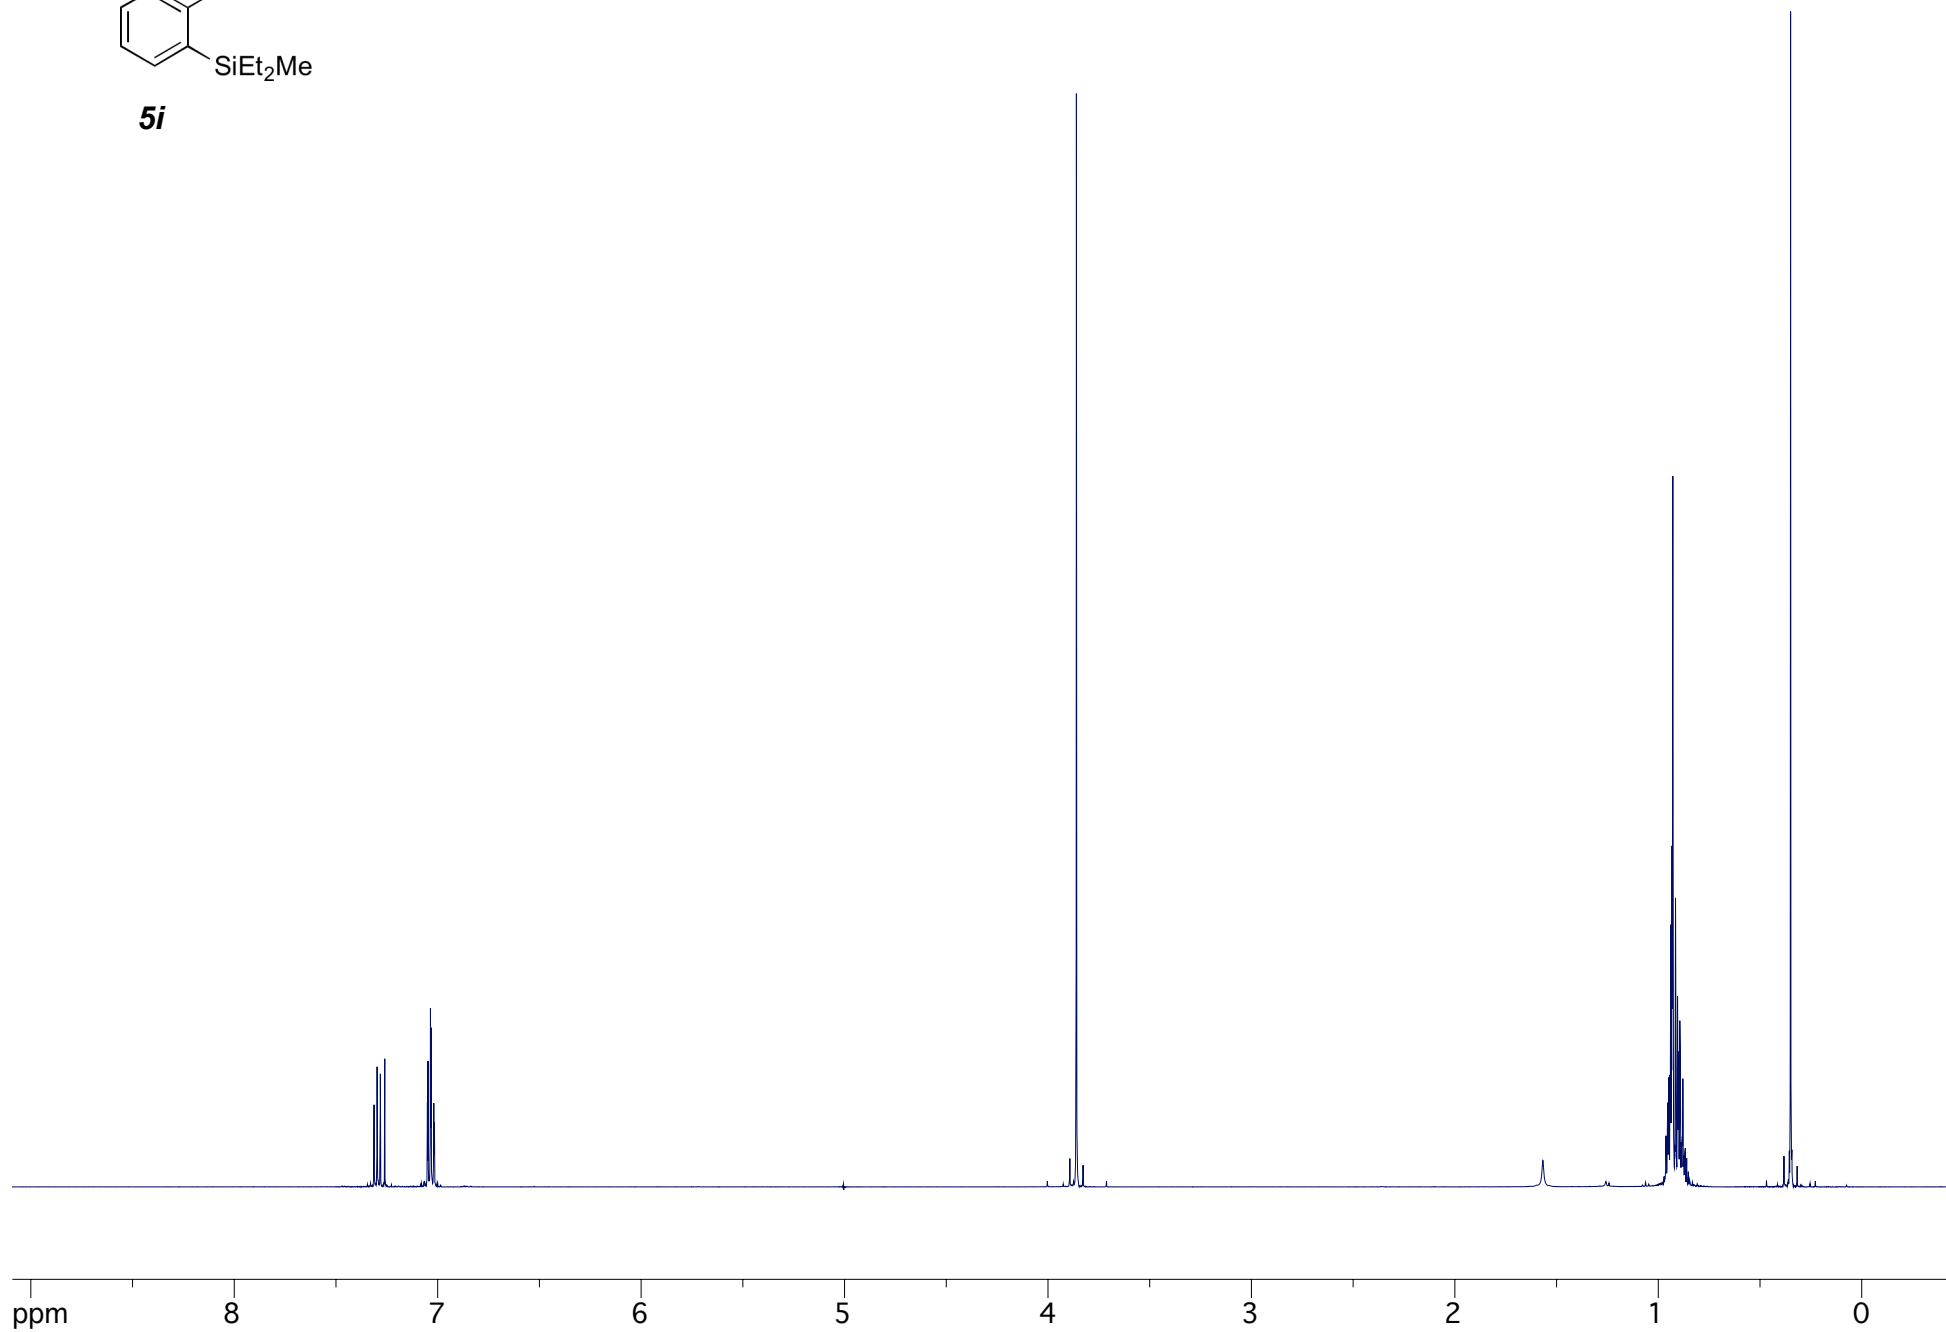

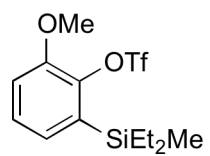**5i**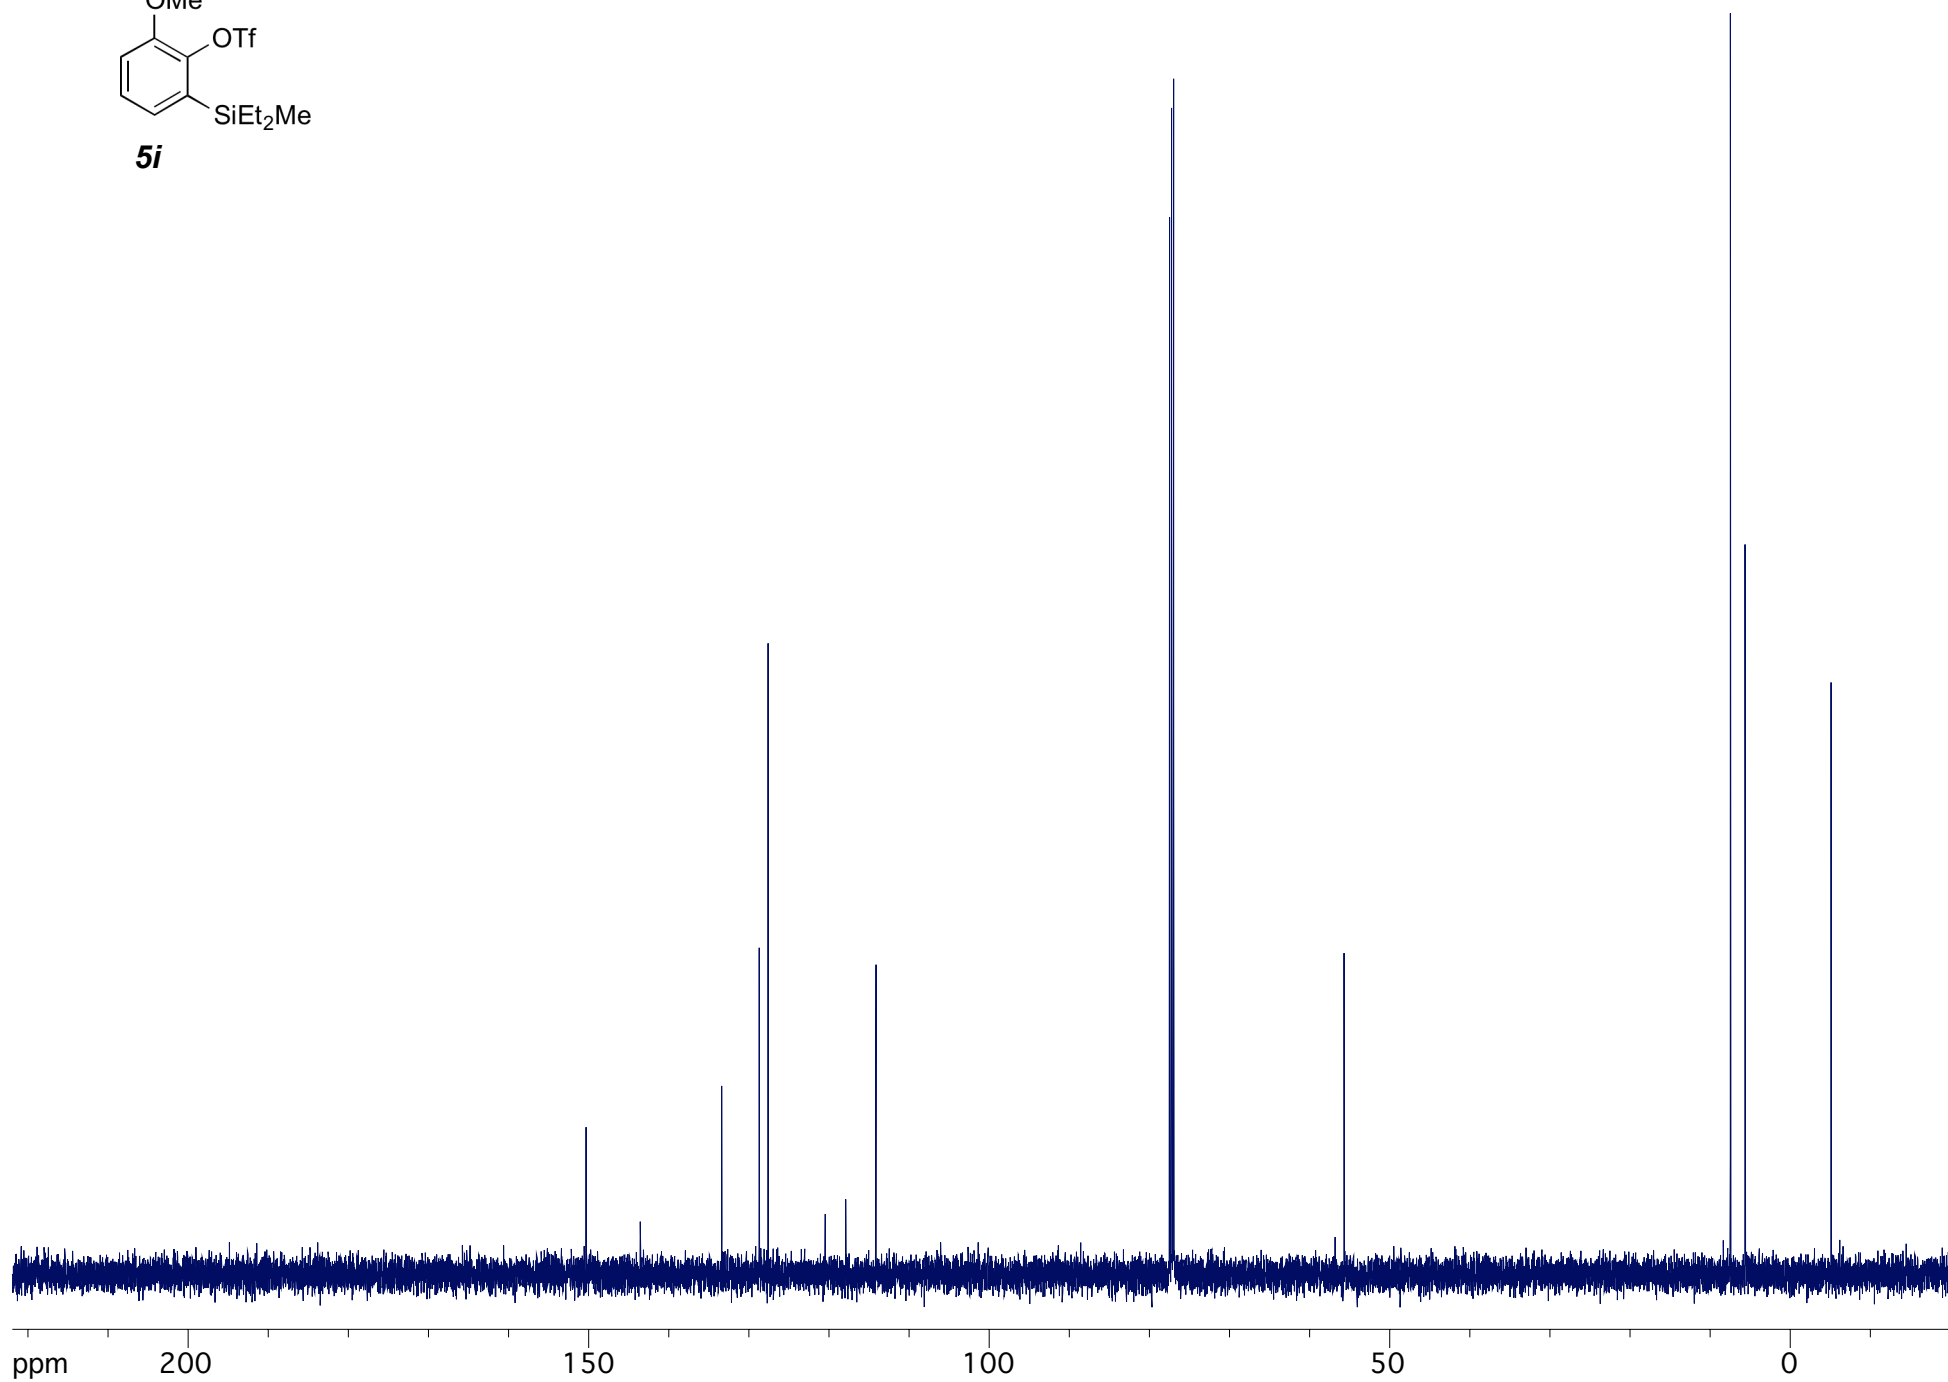

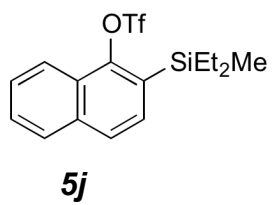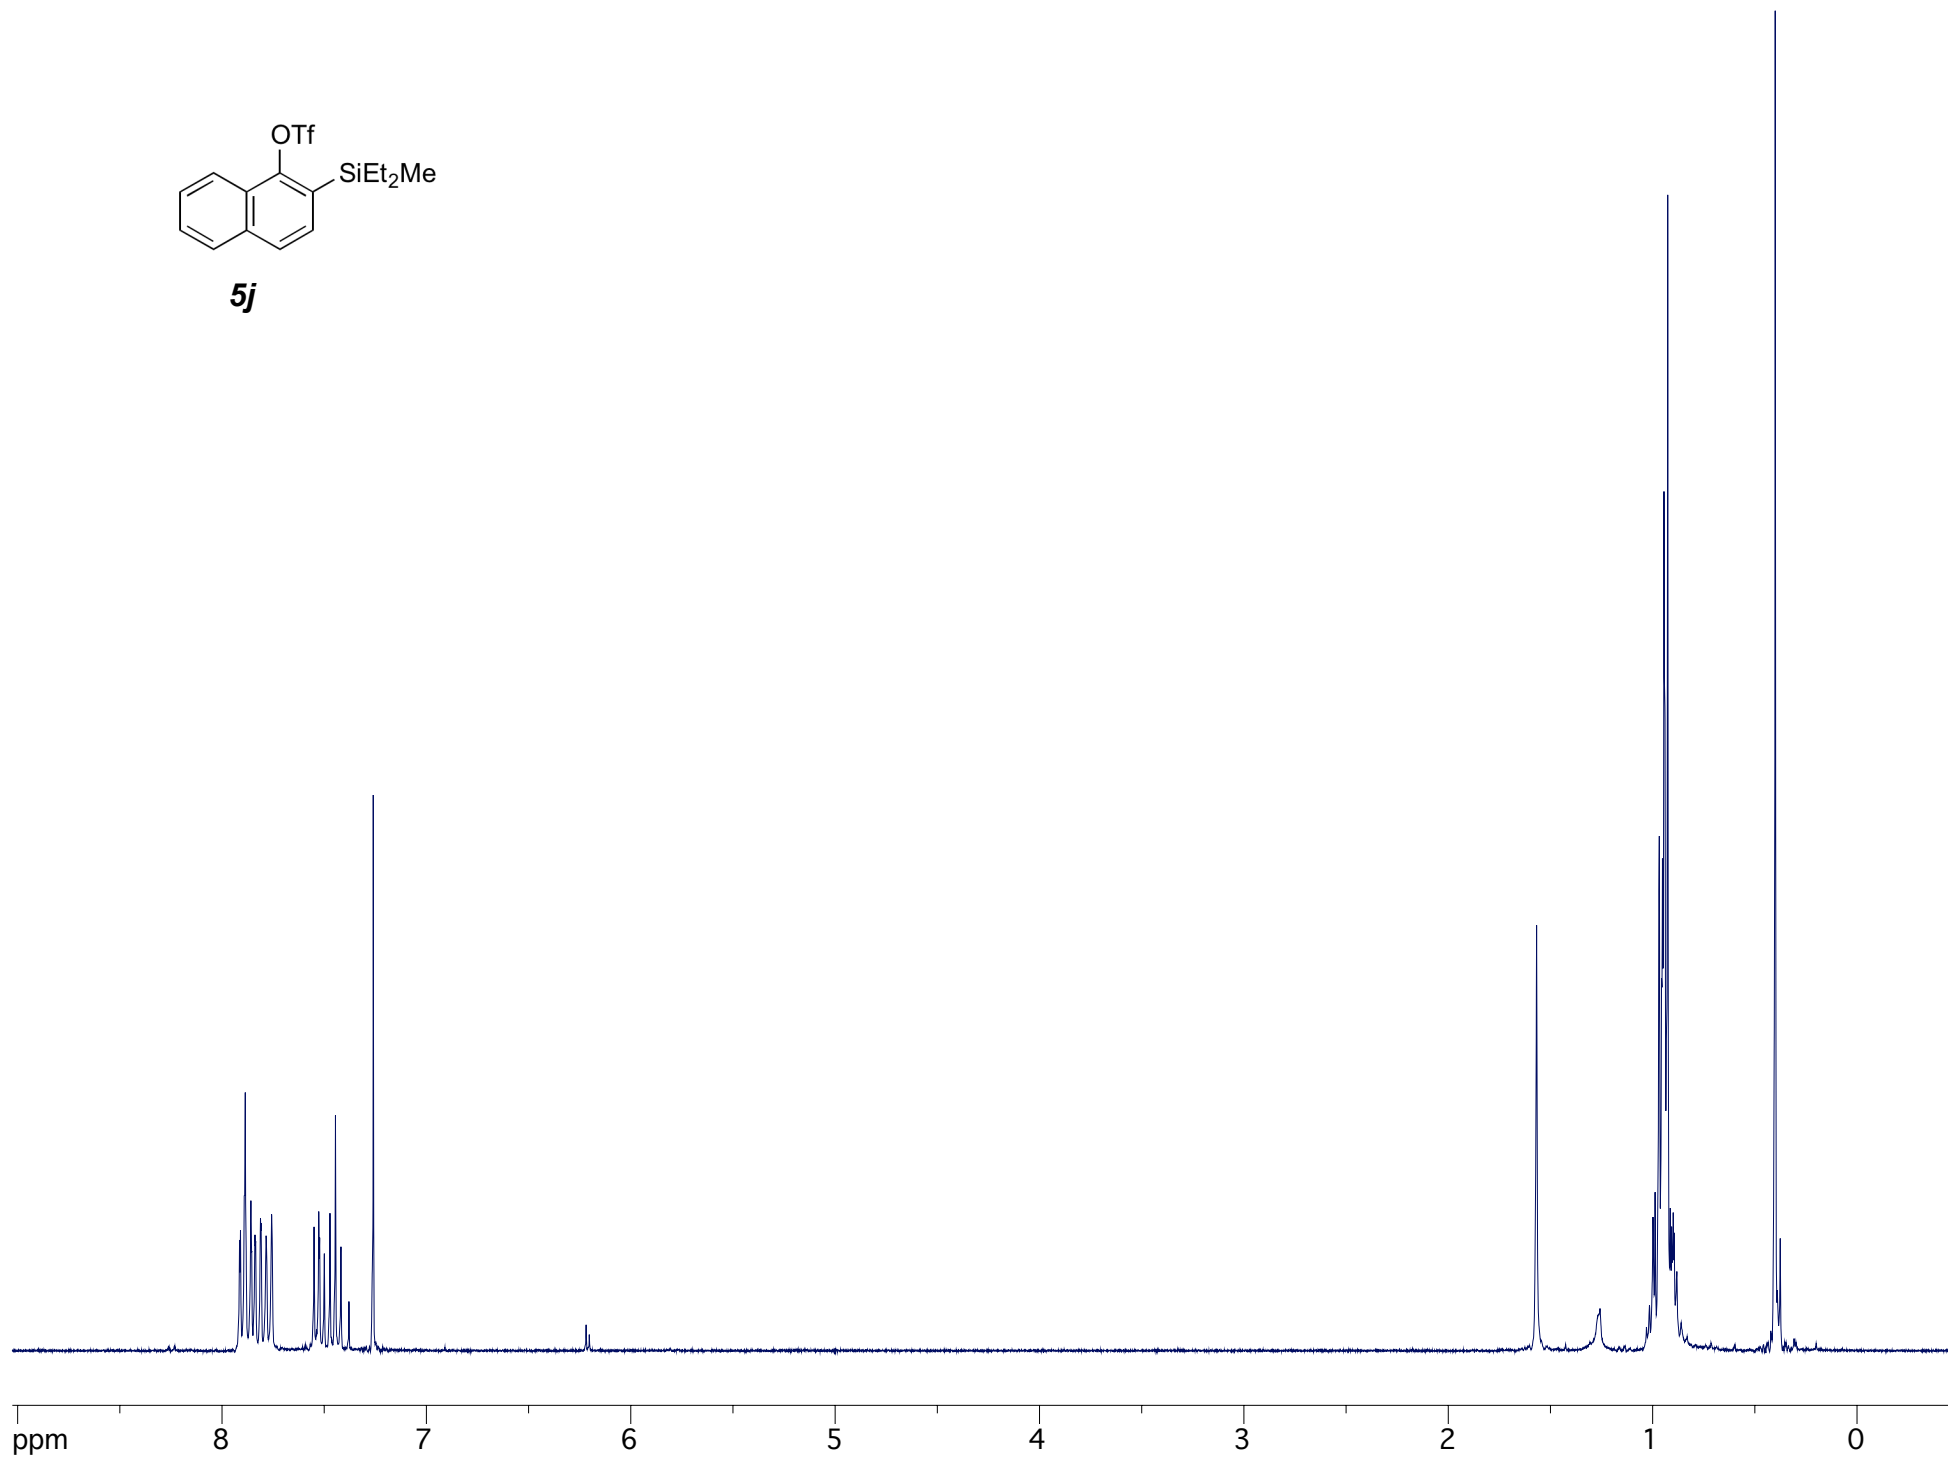

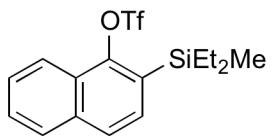**5j**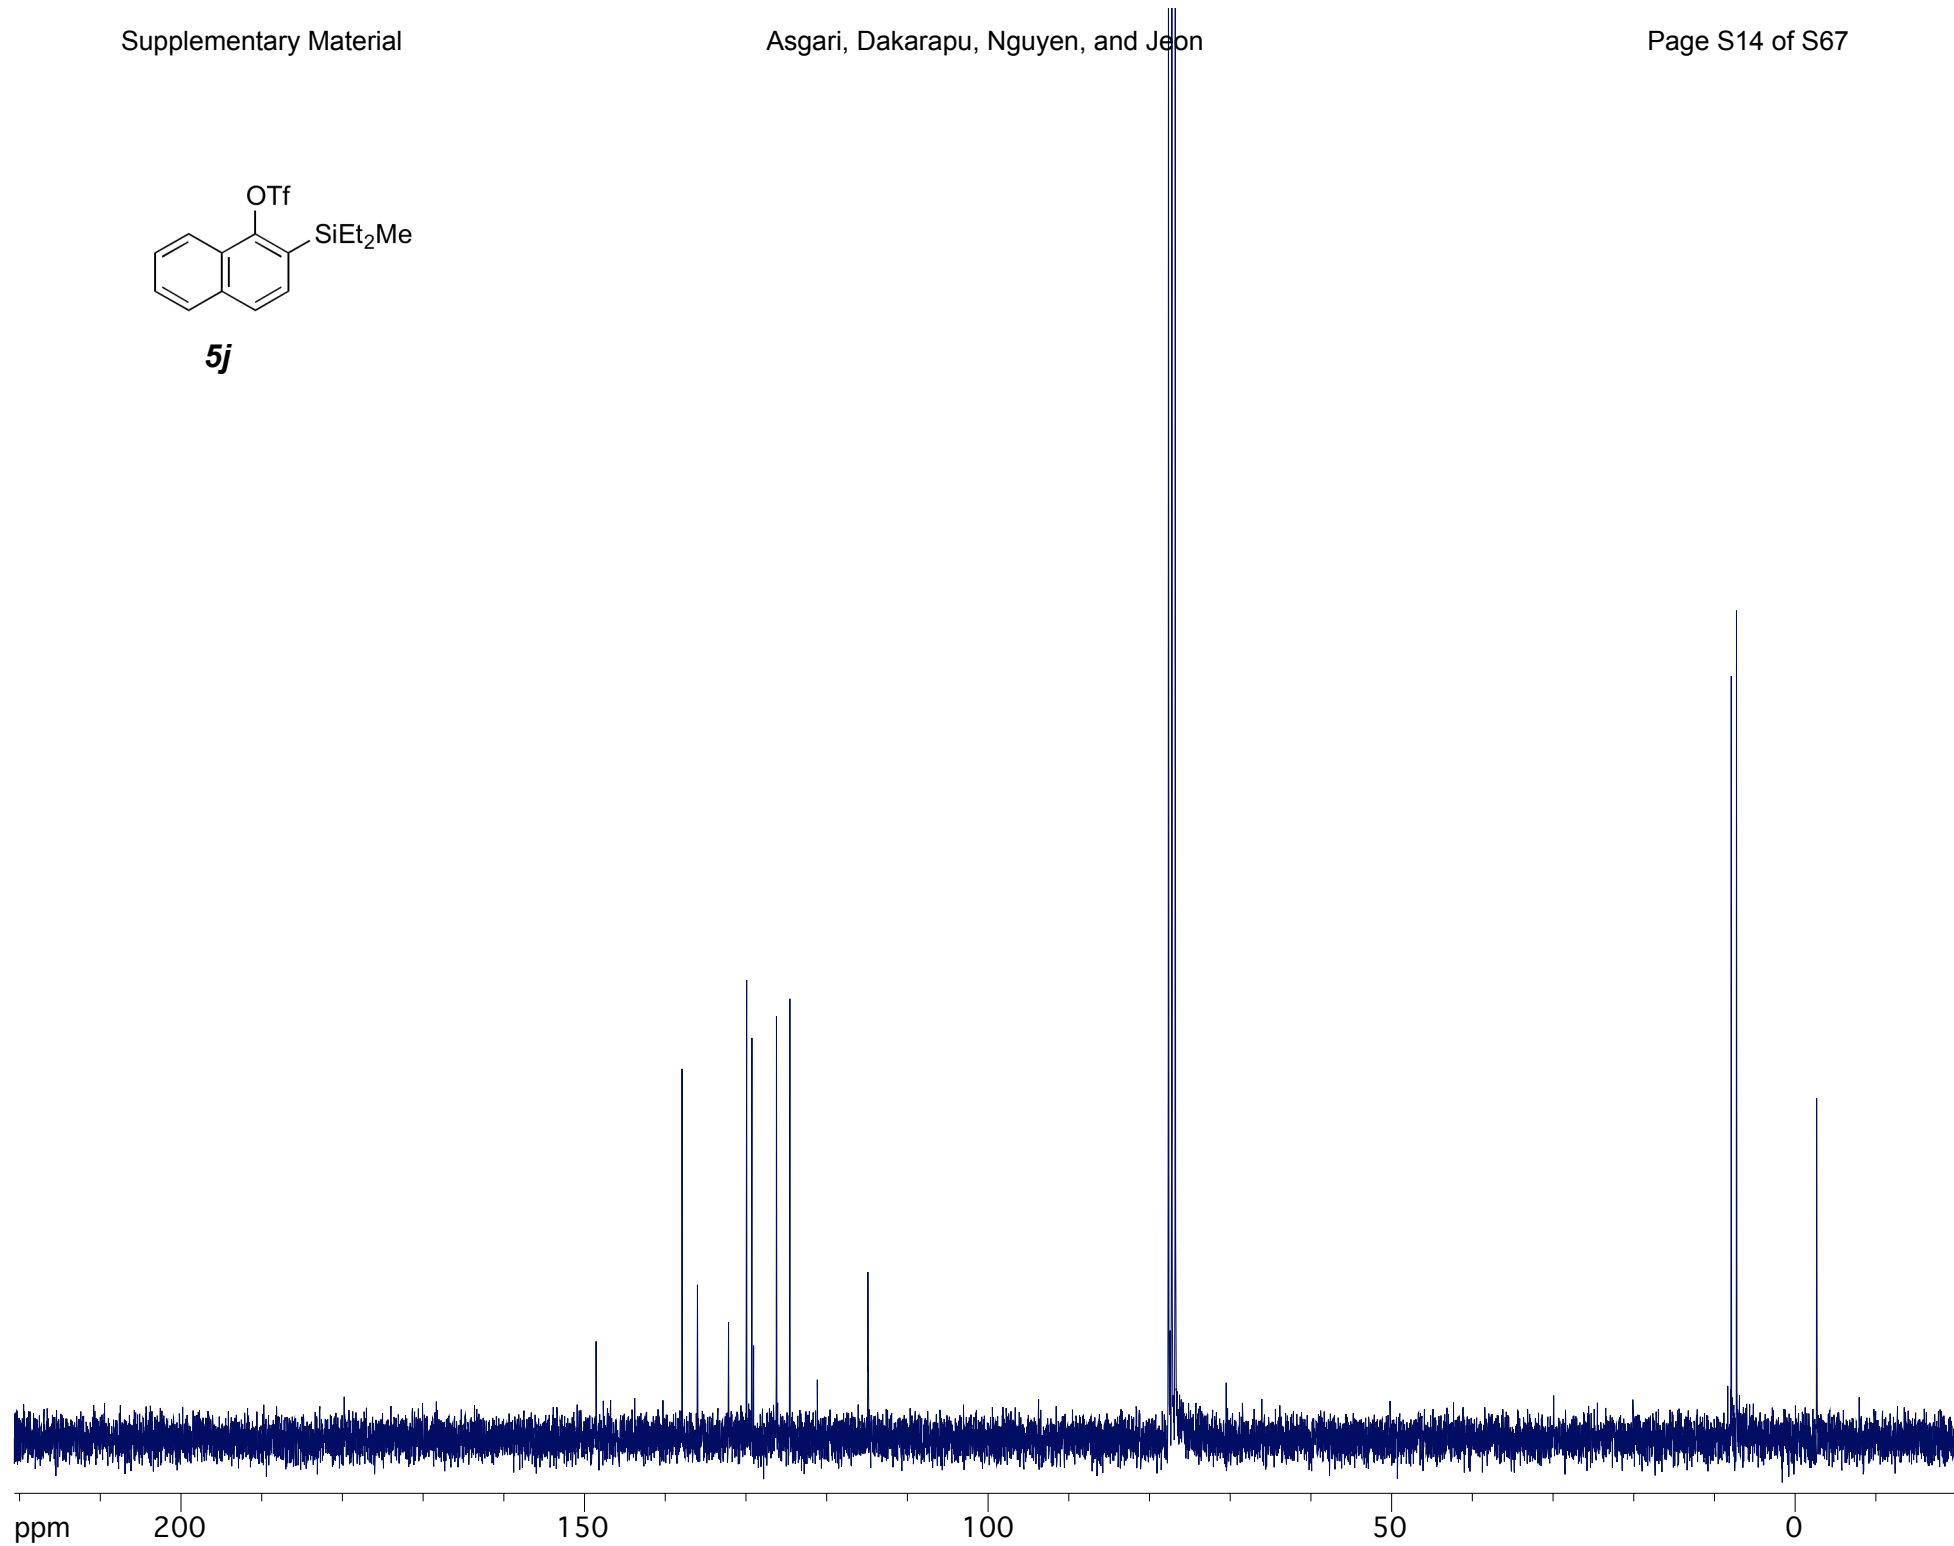

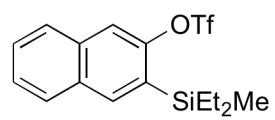**5k**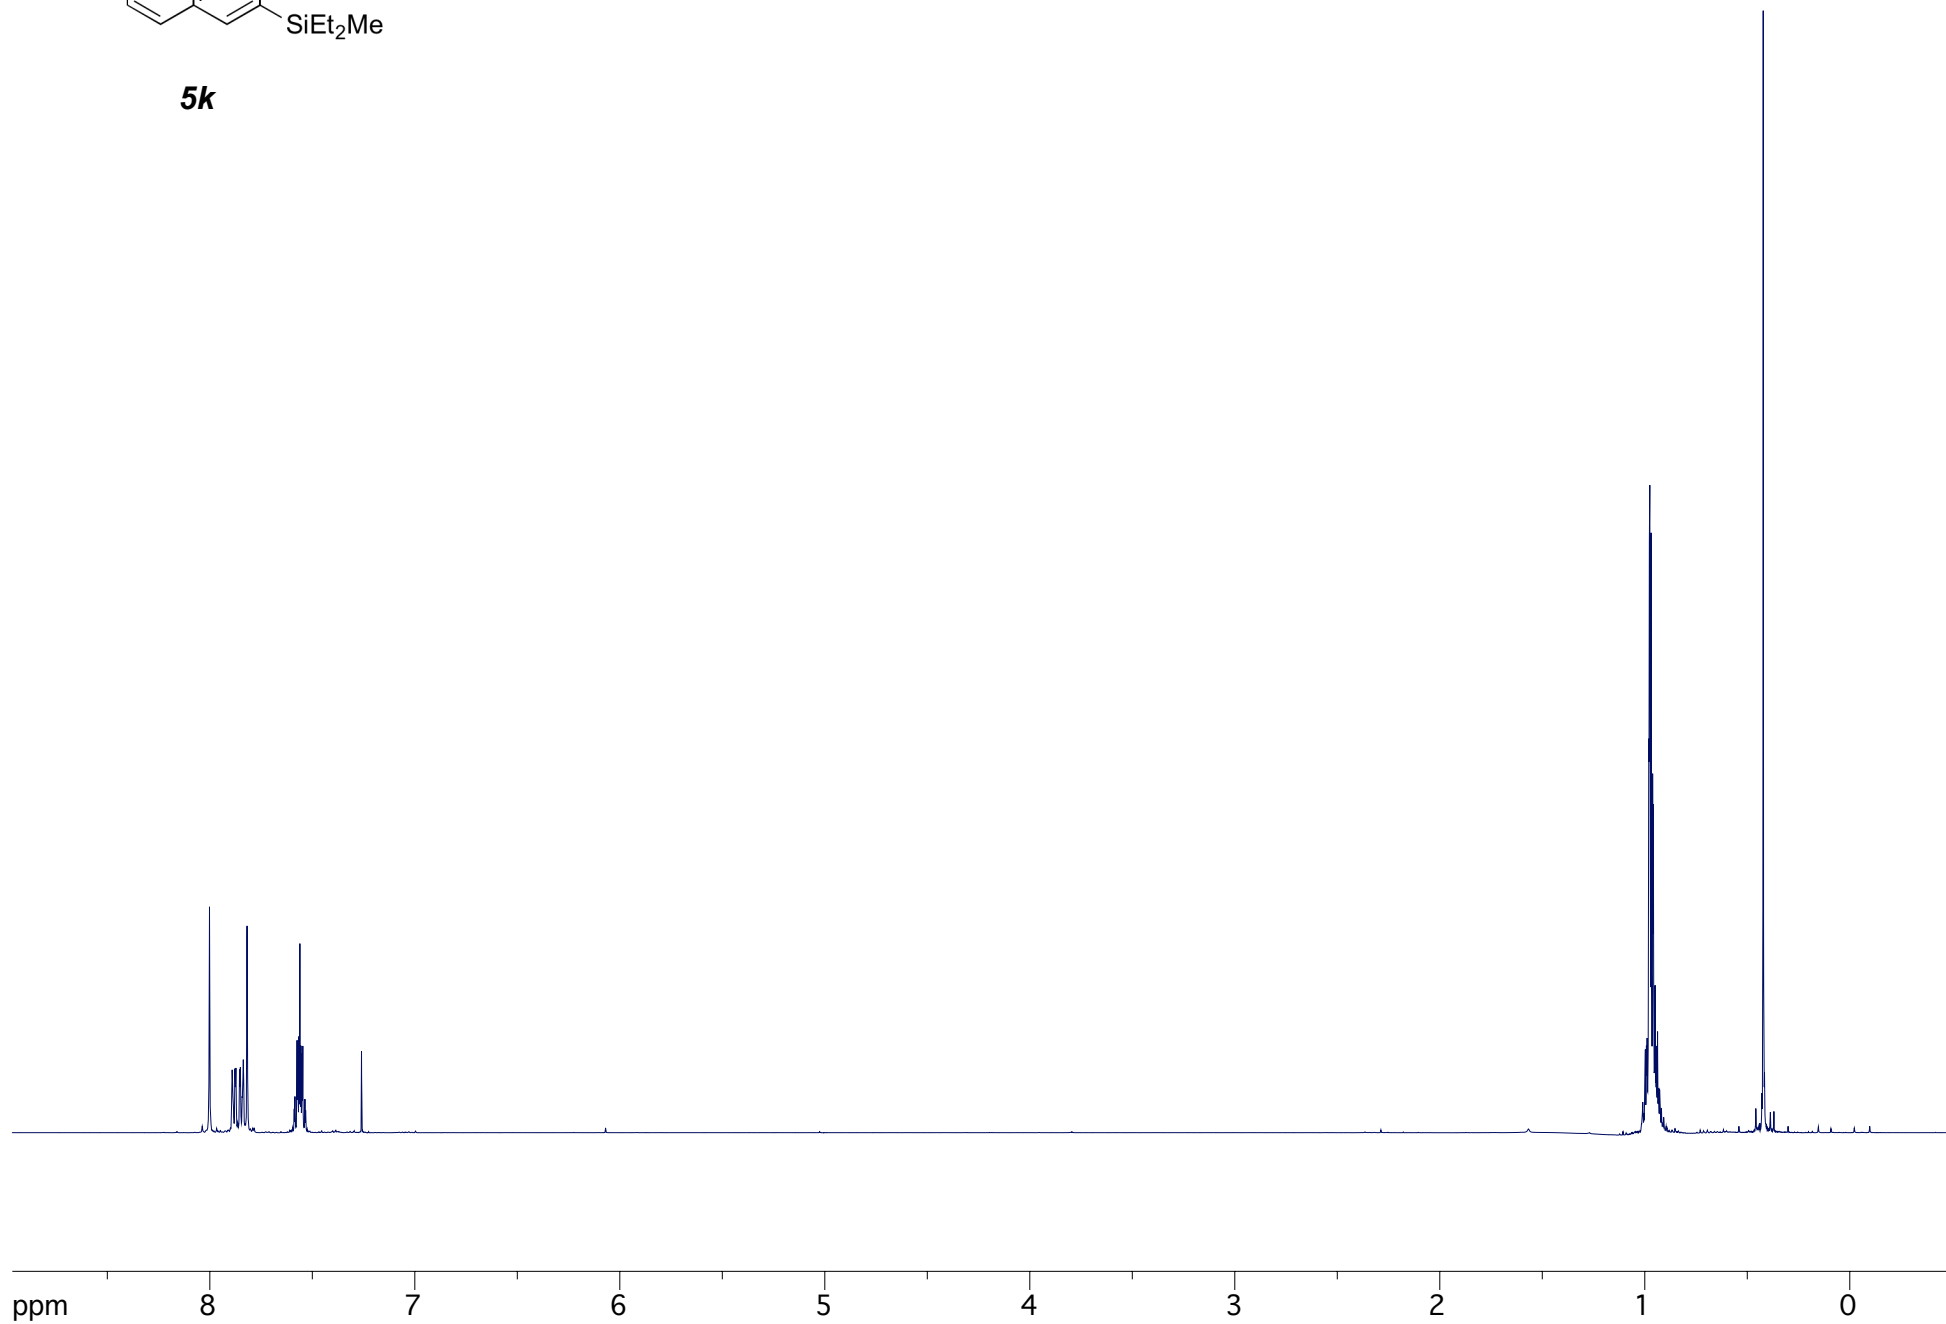



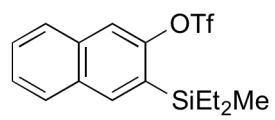**5k**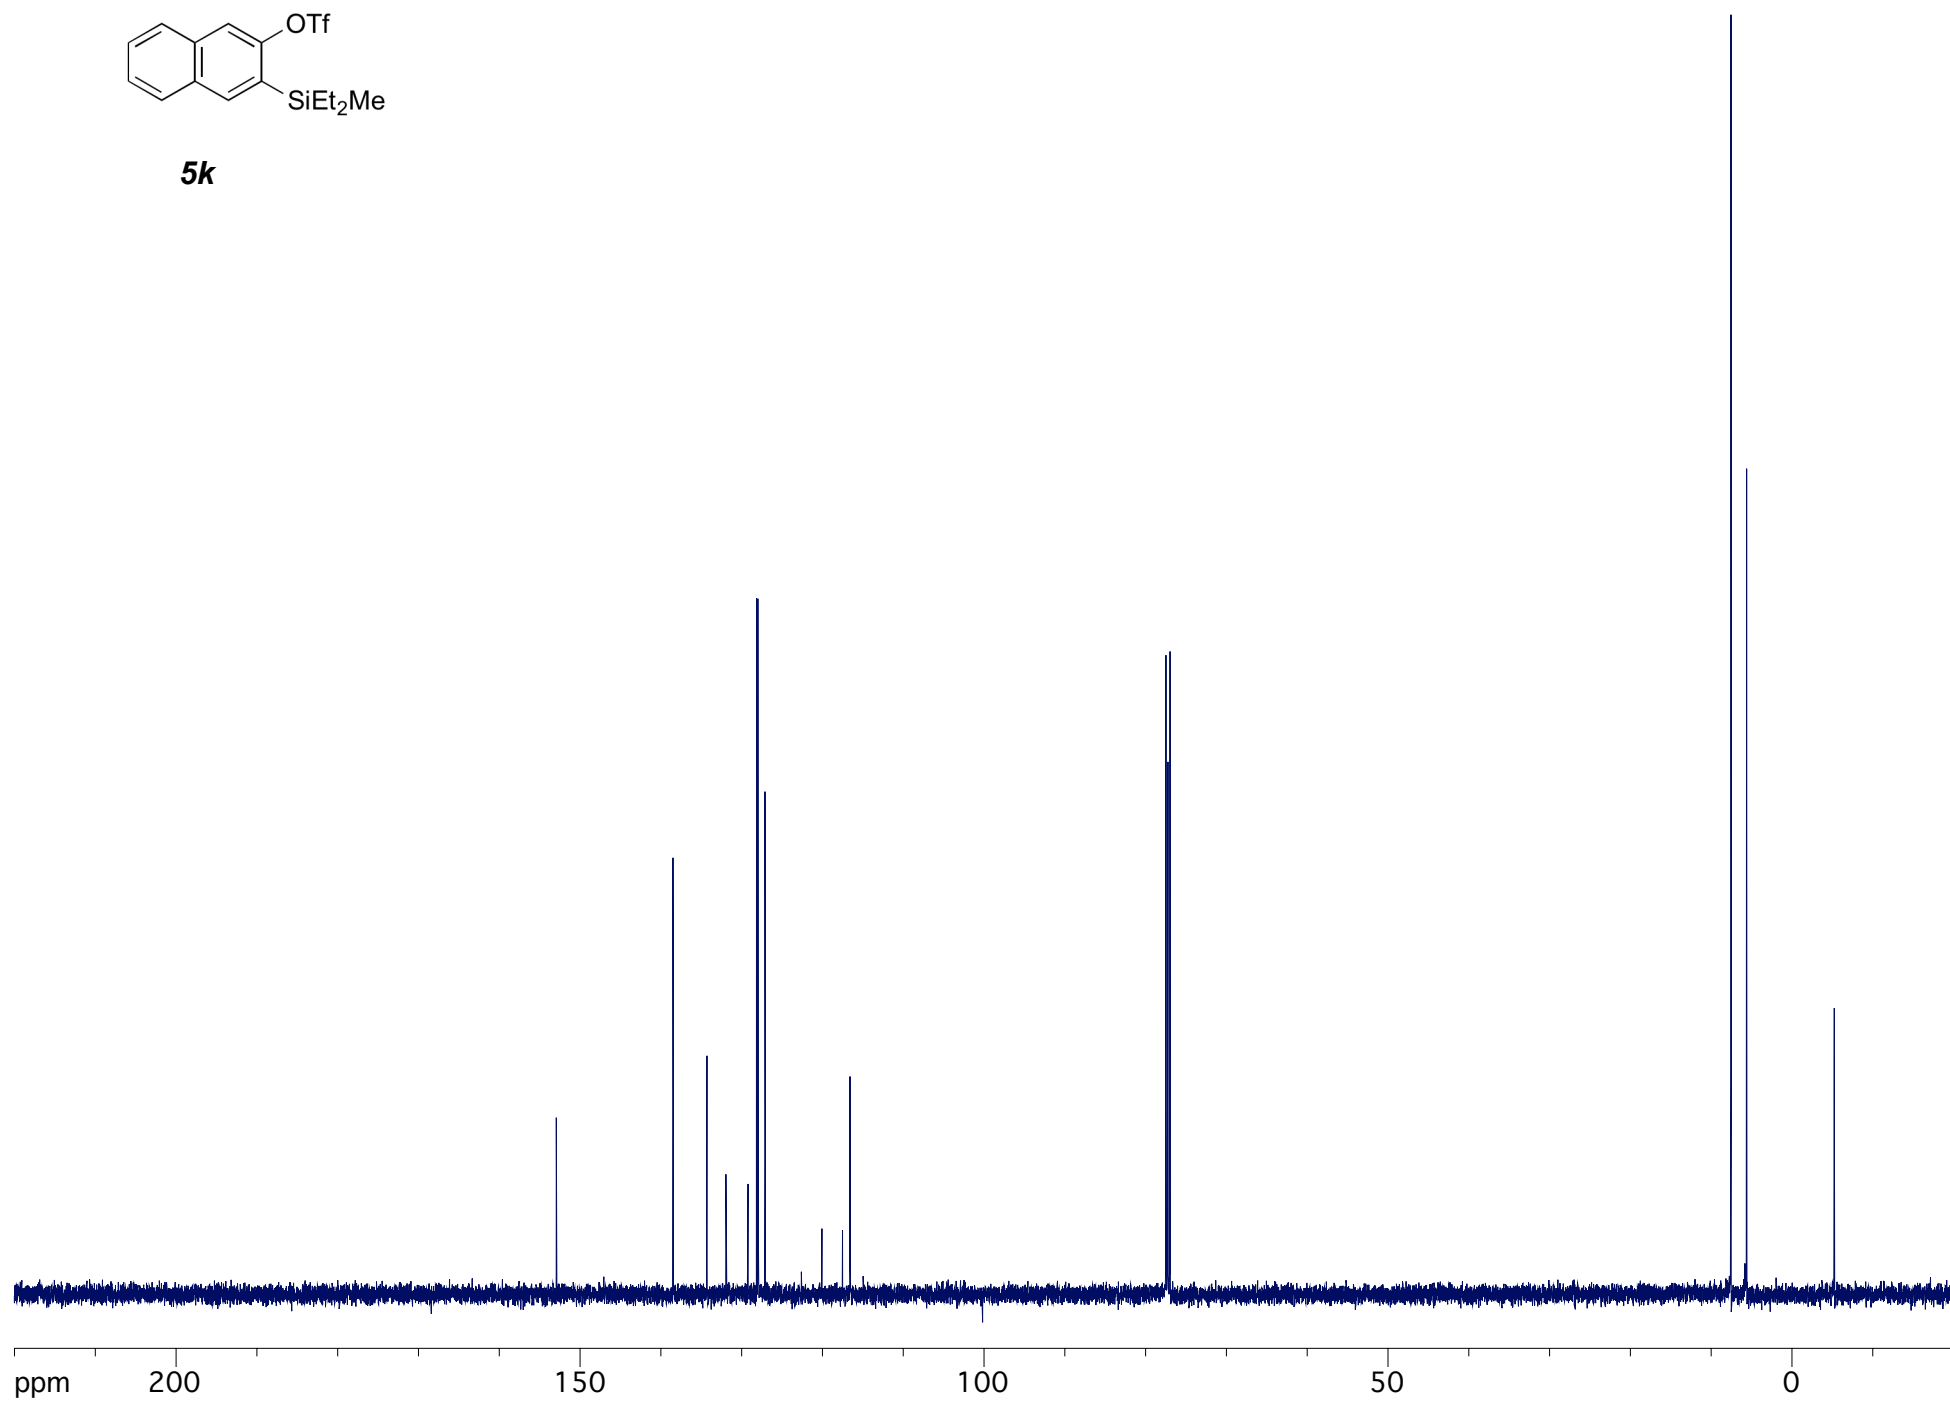

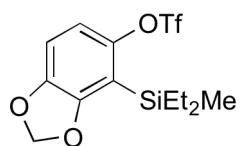**5I**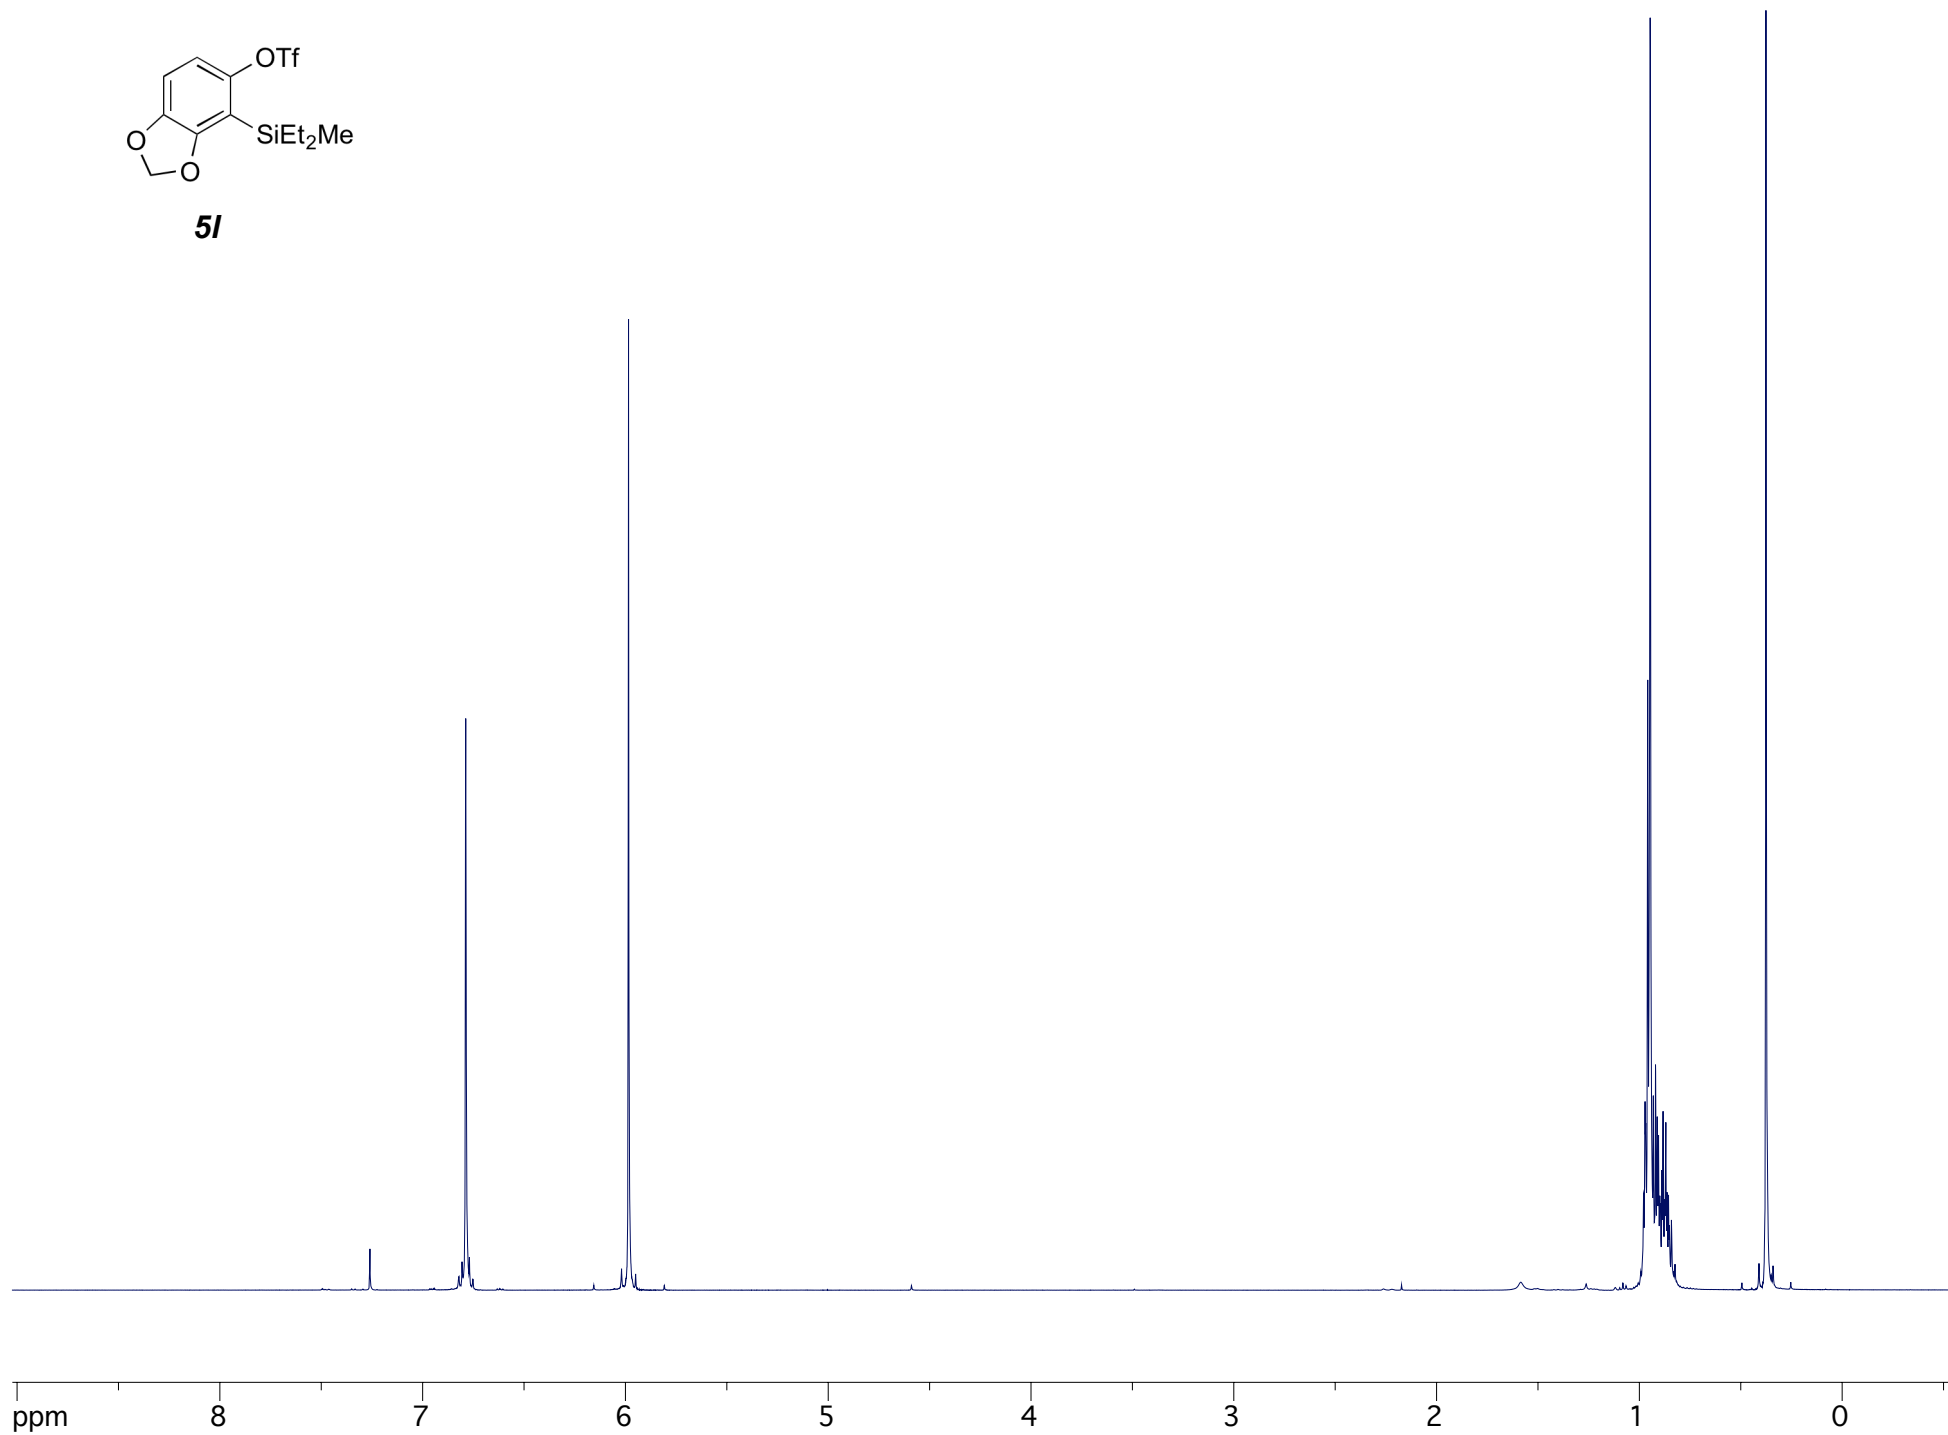

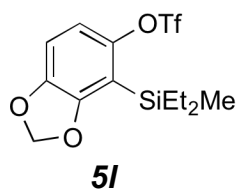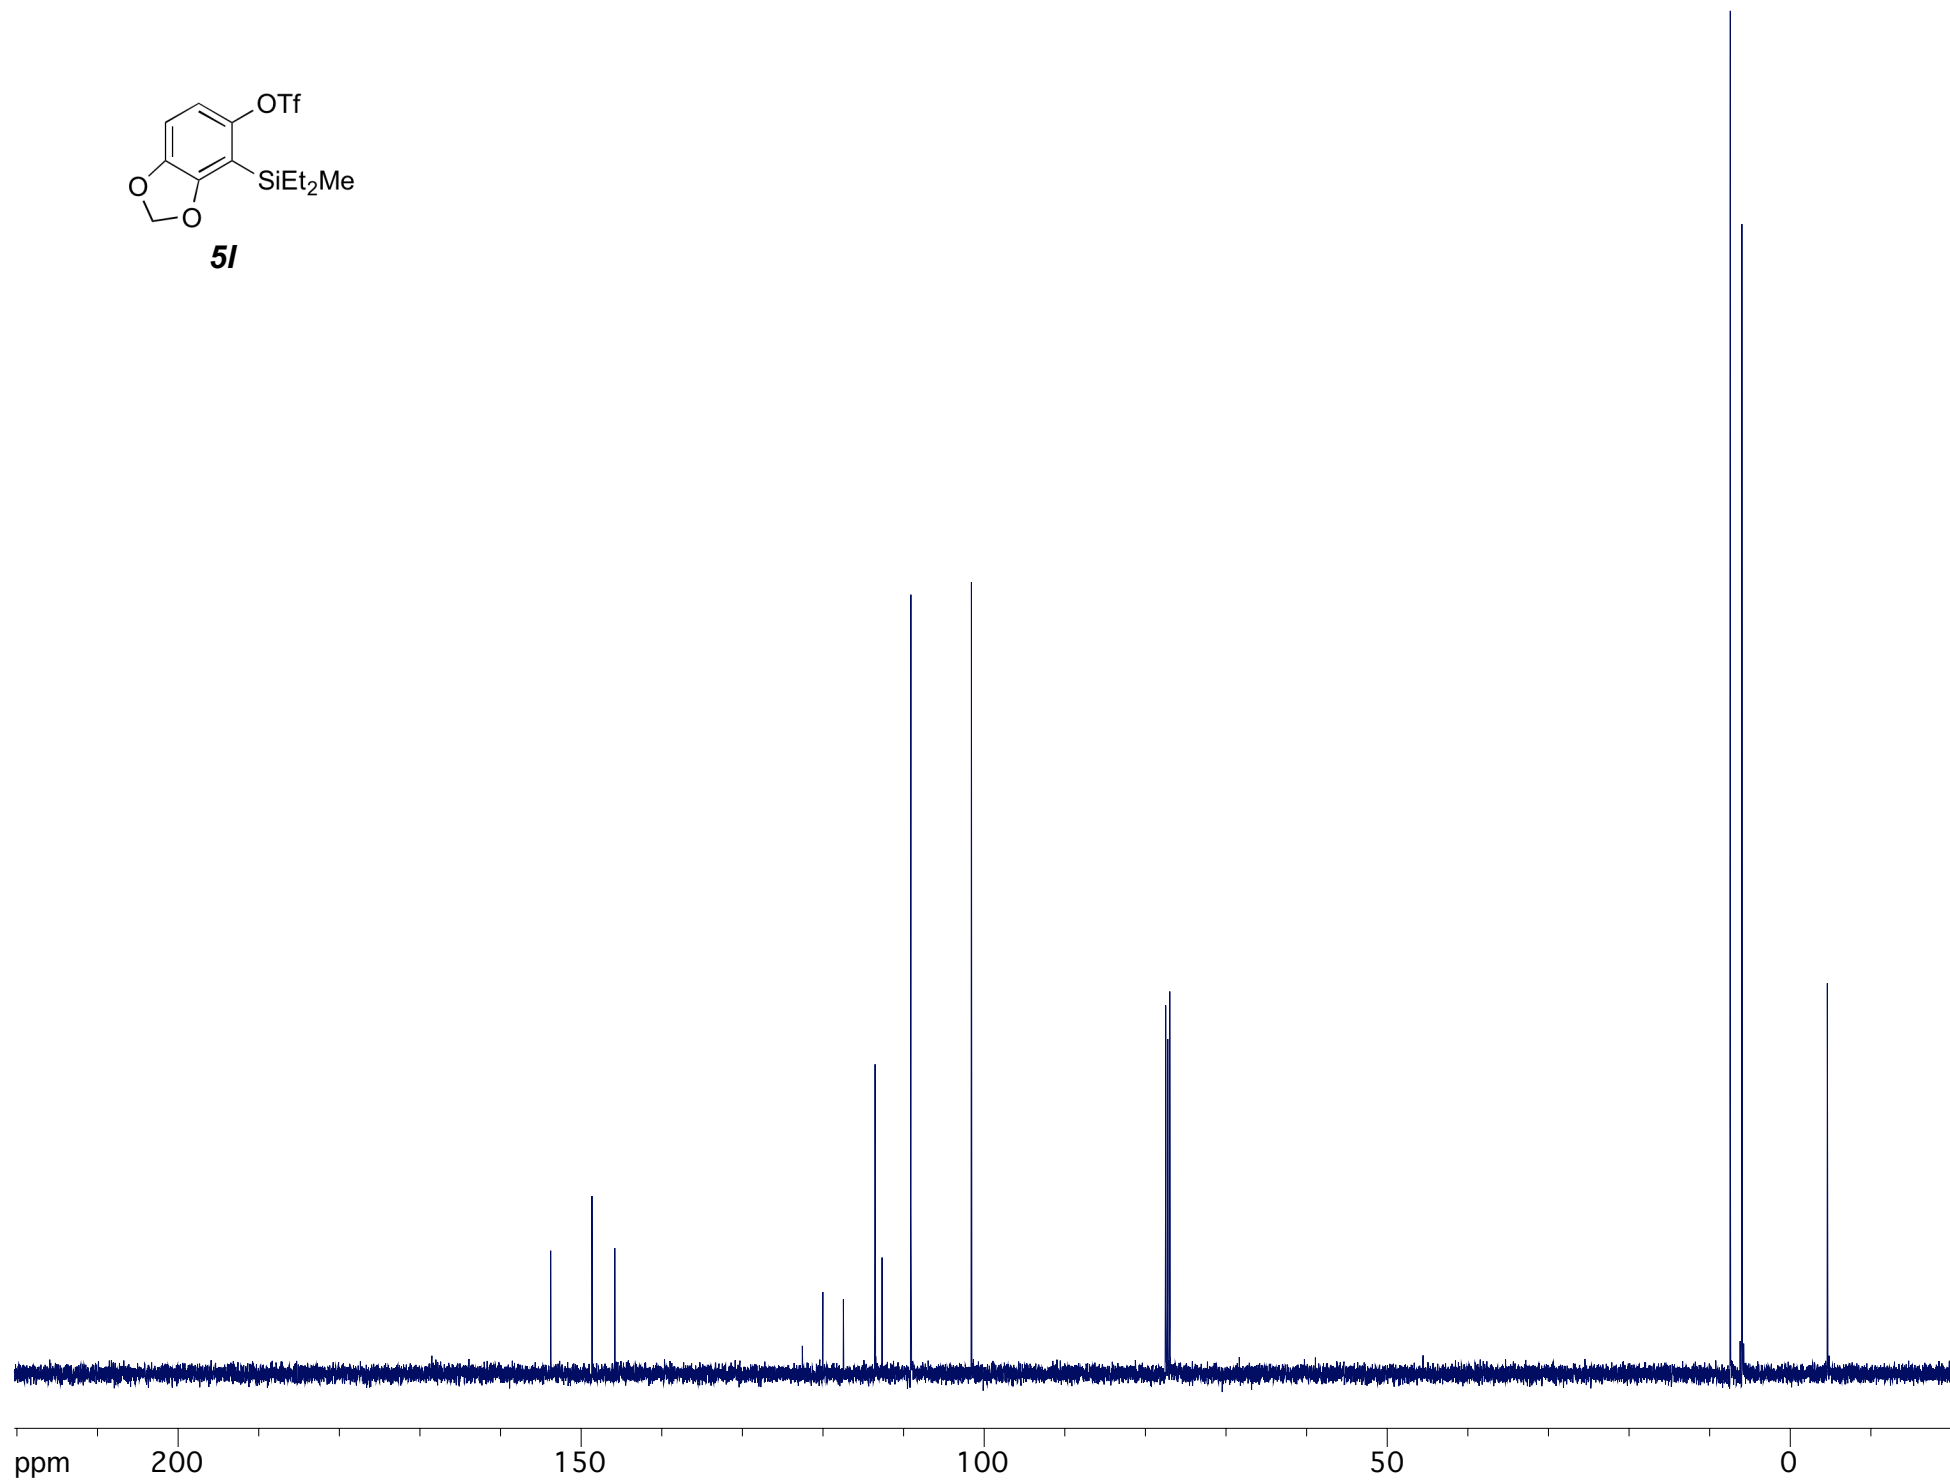

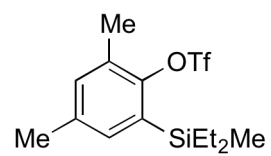**5m**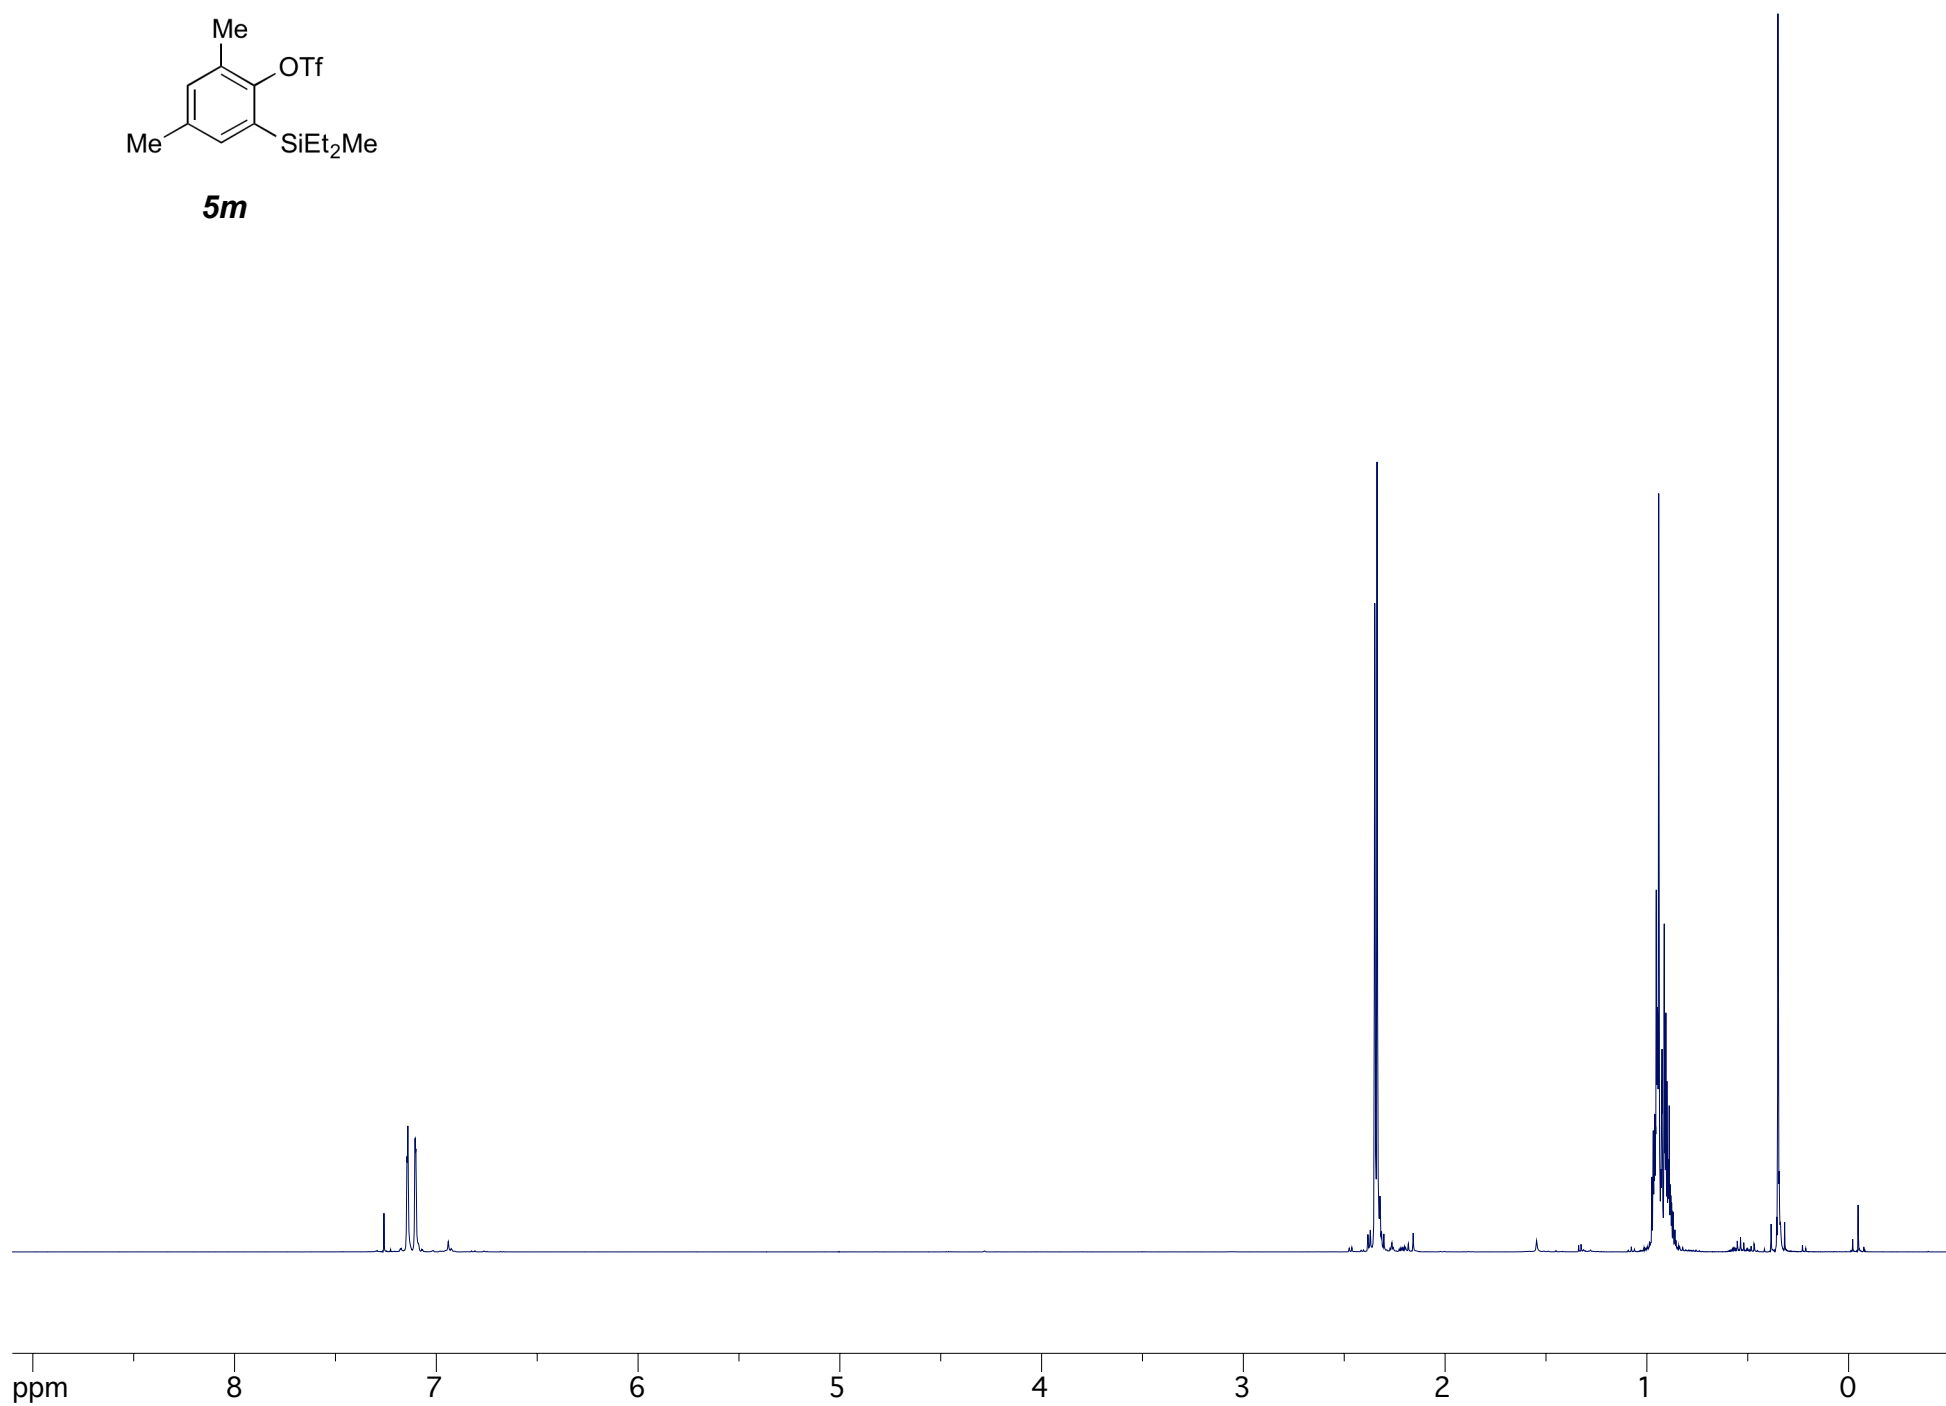

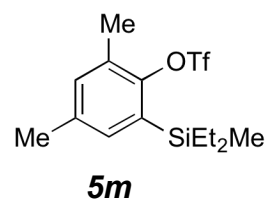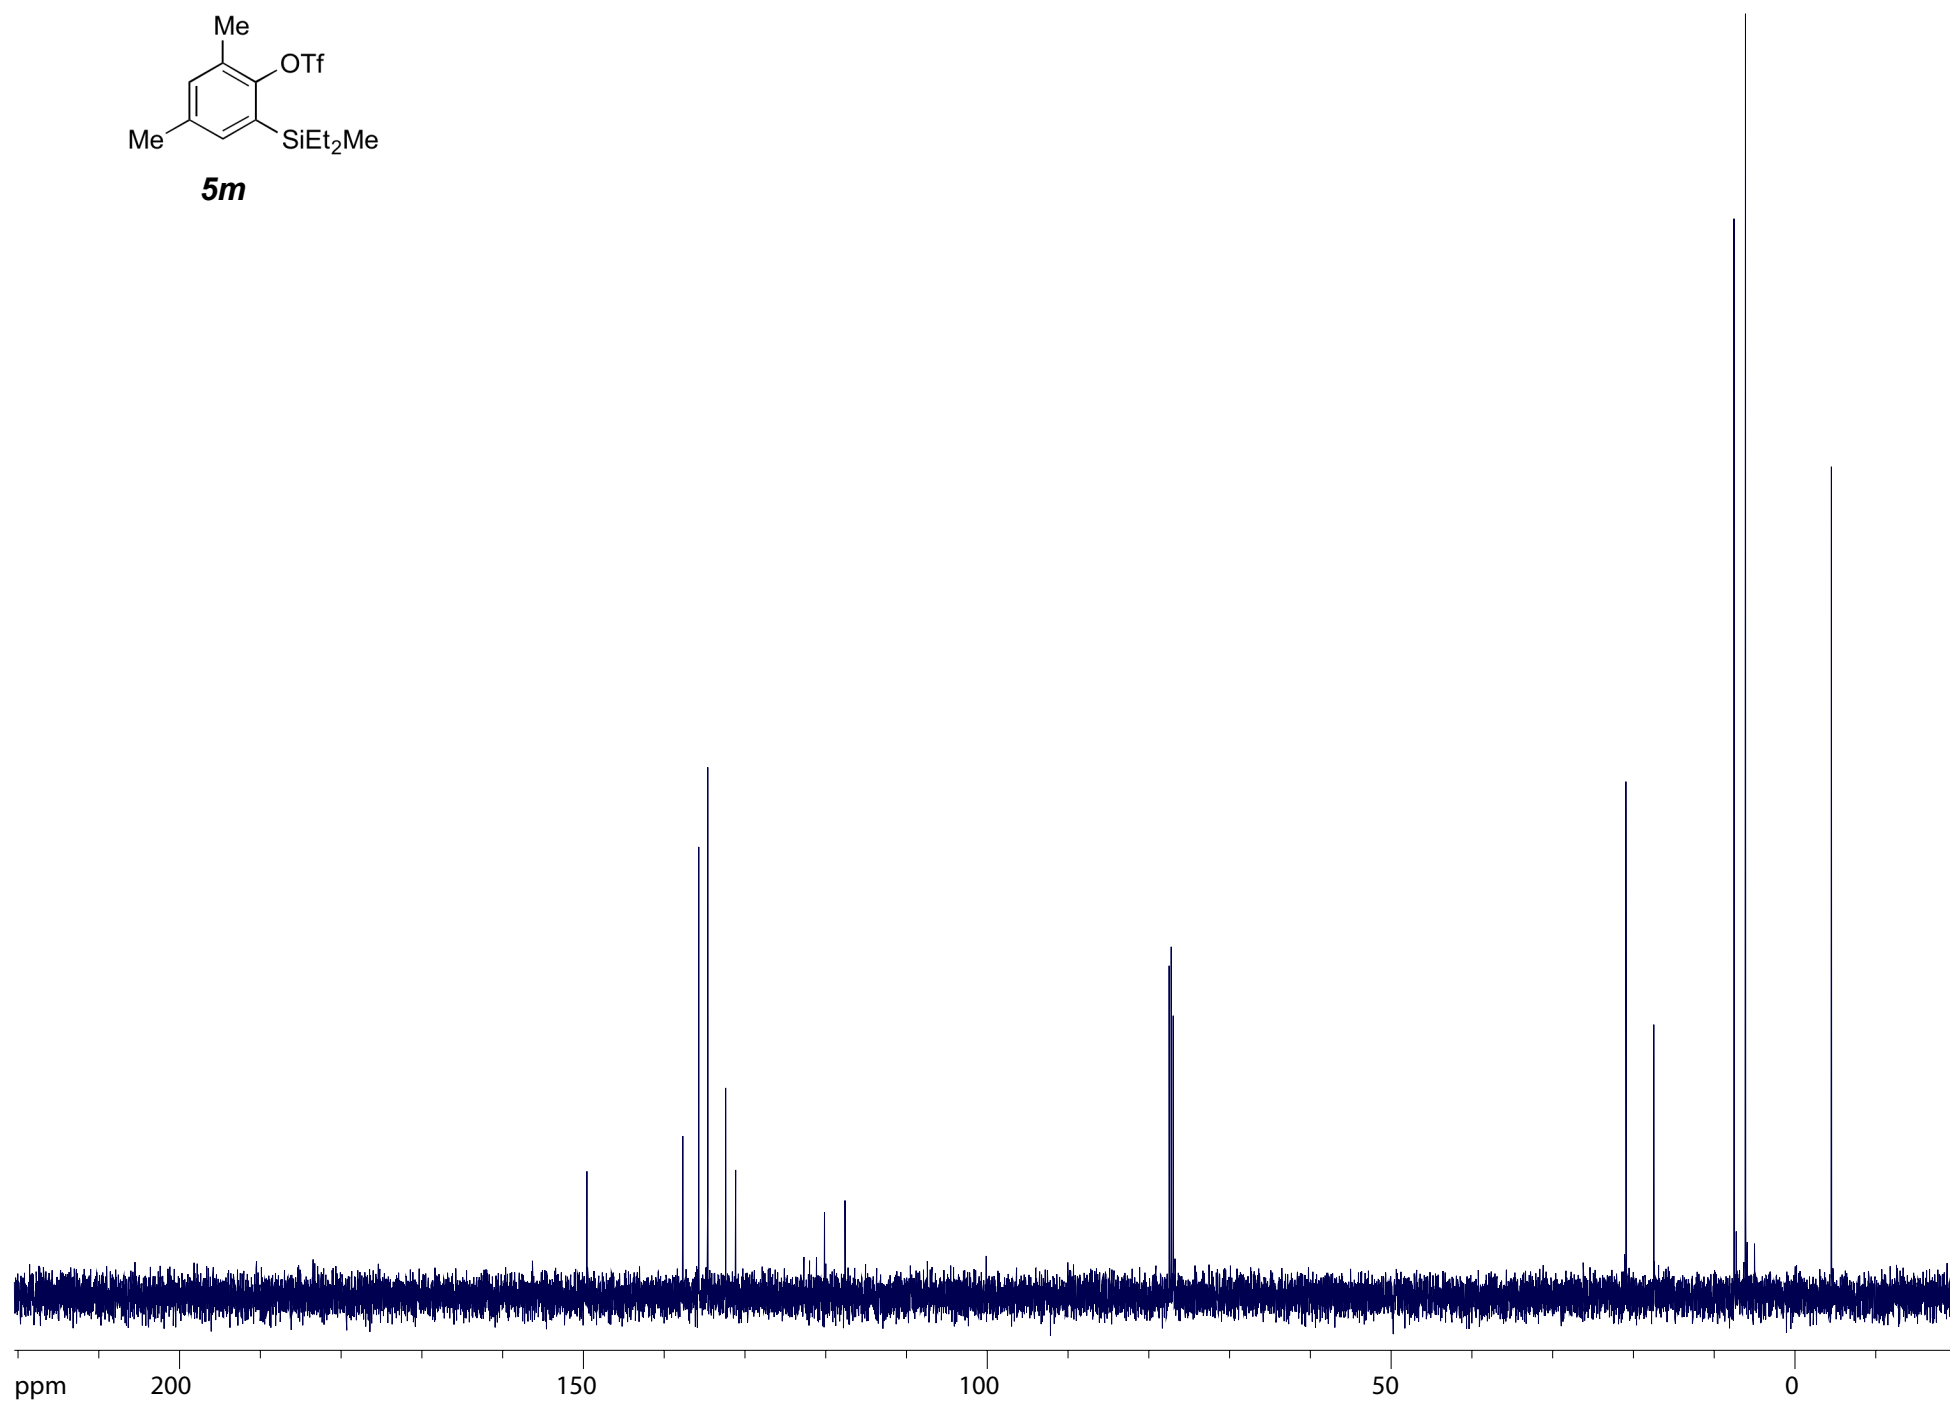

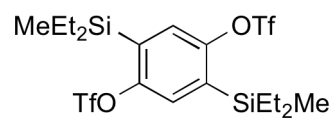**5n**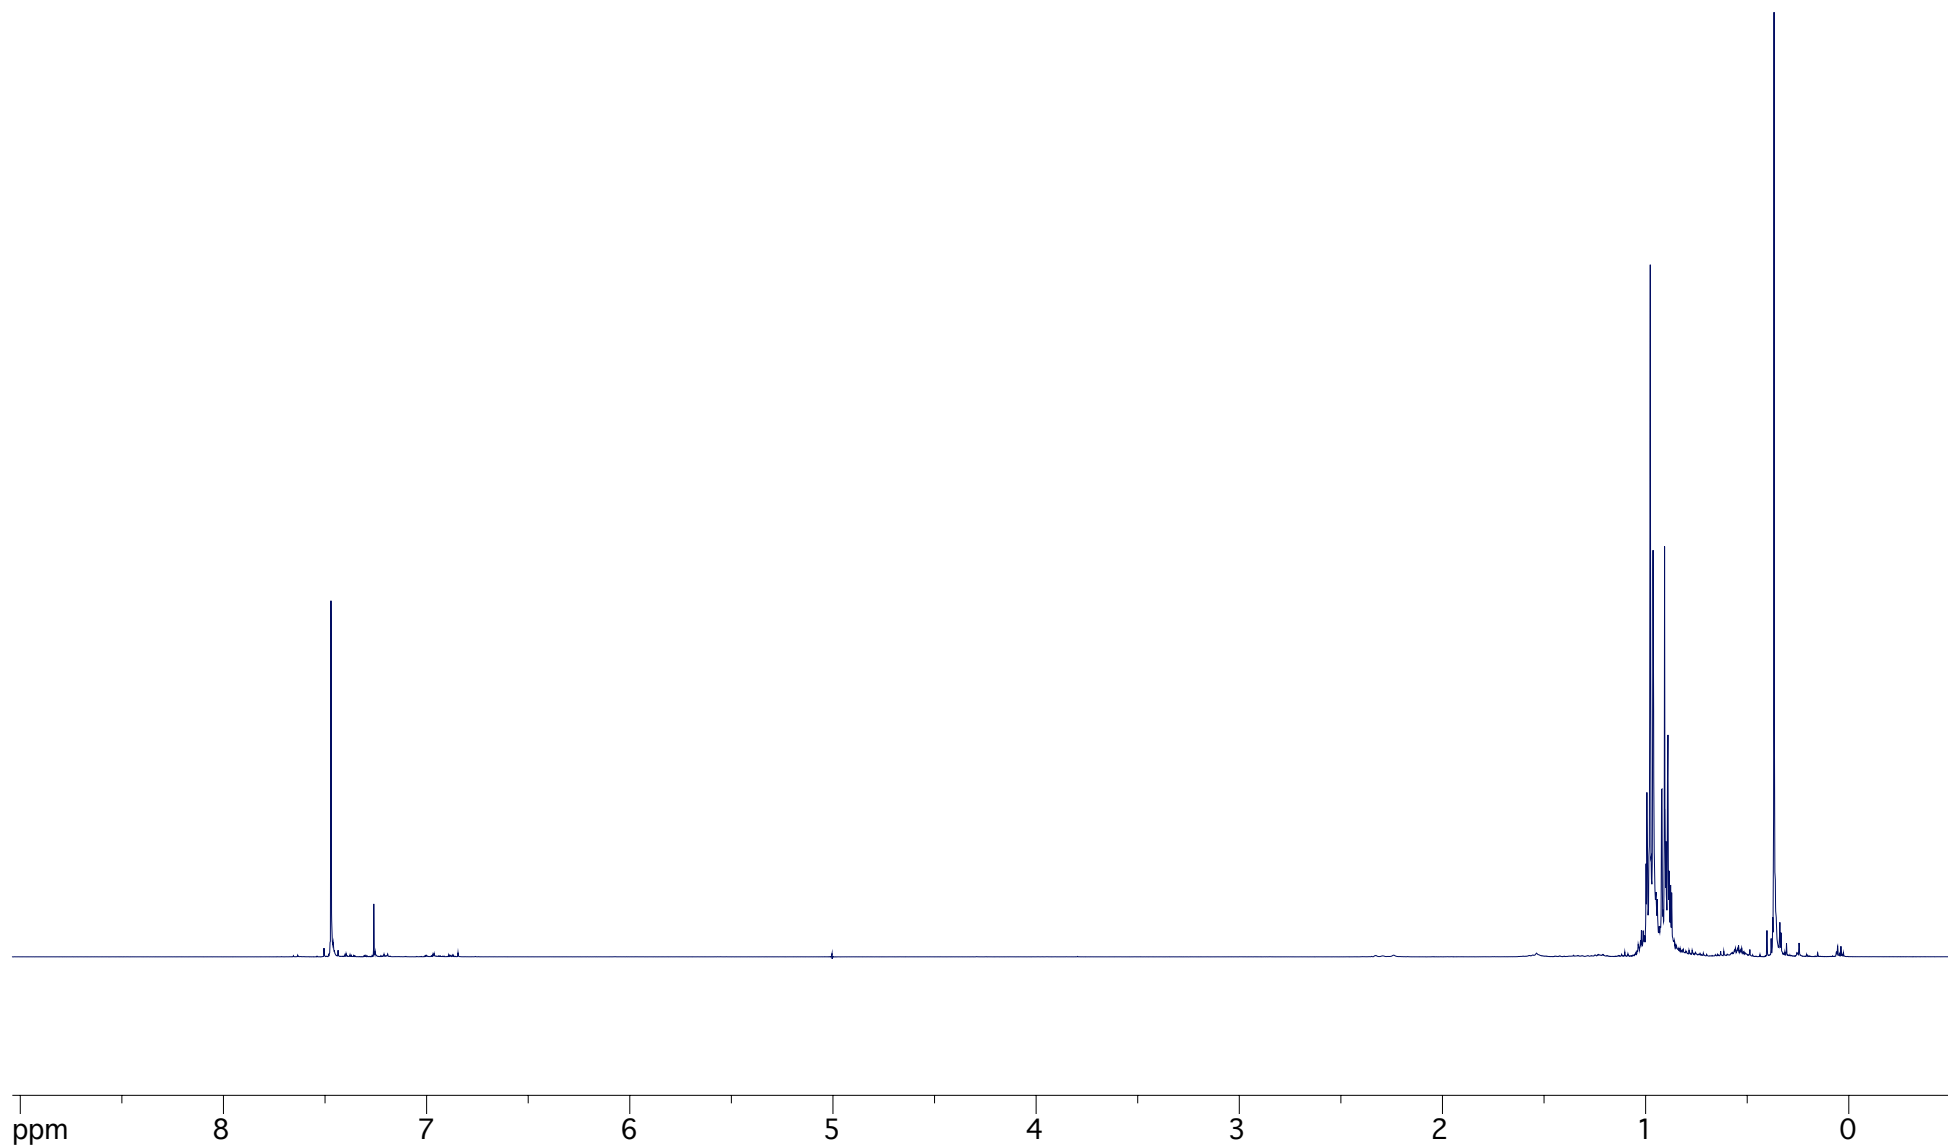

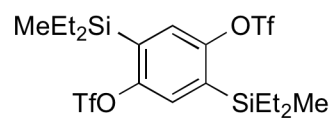**5n**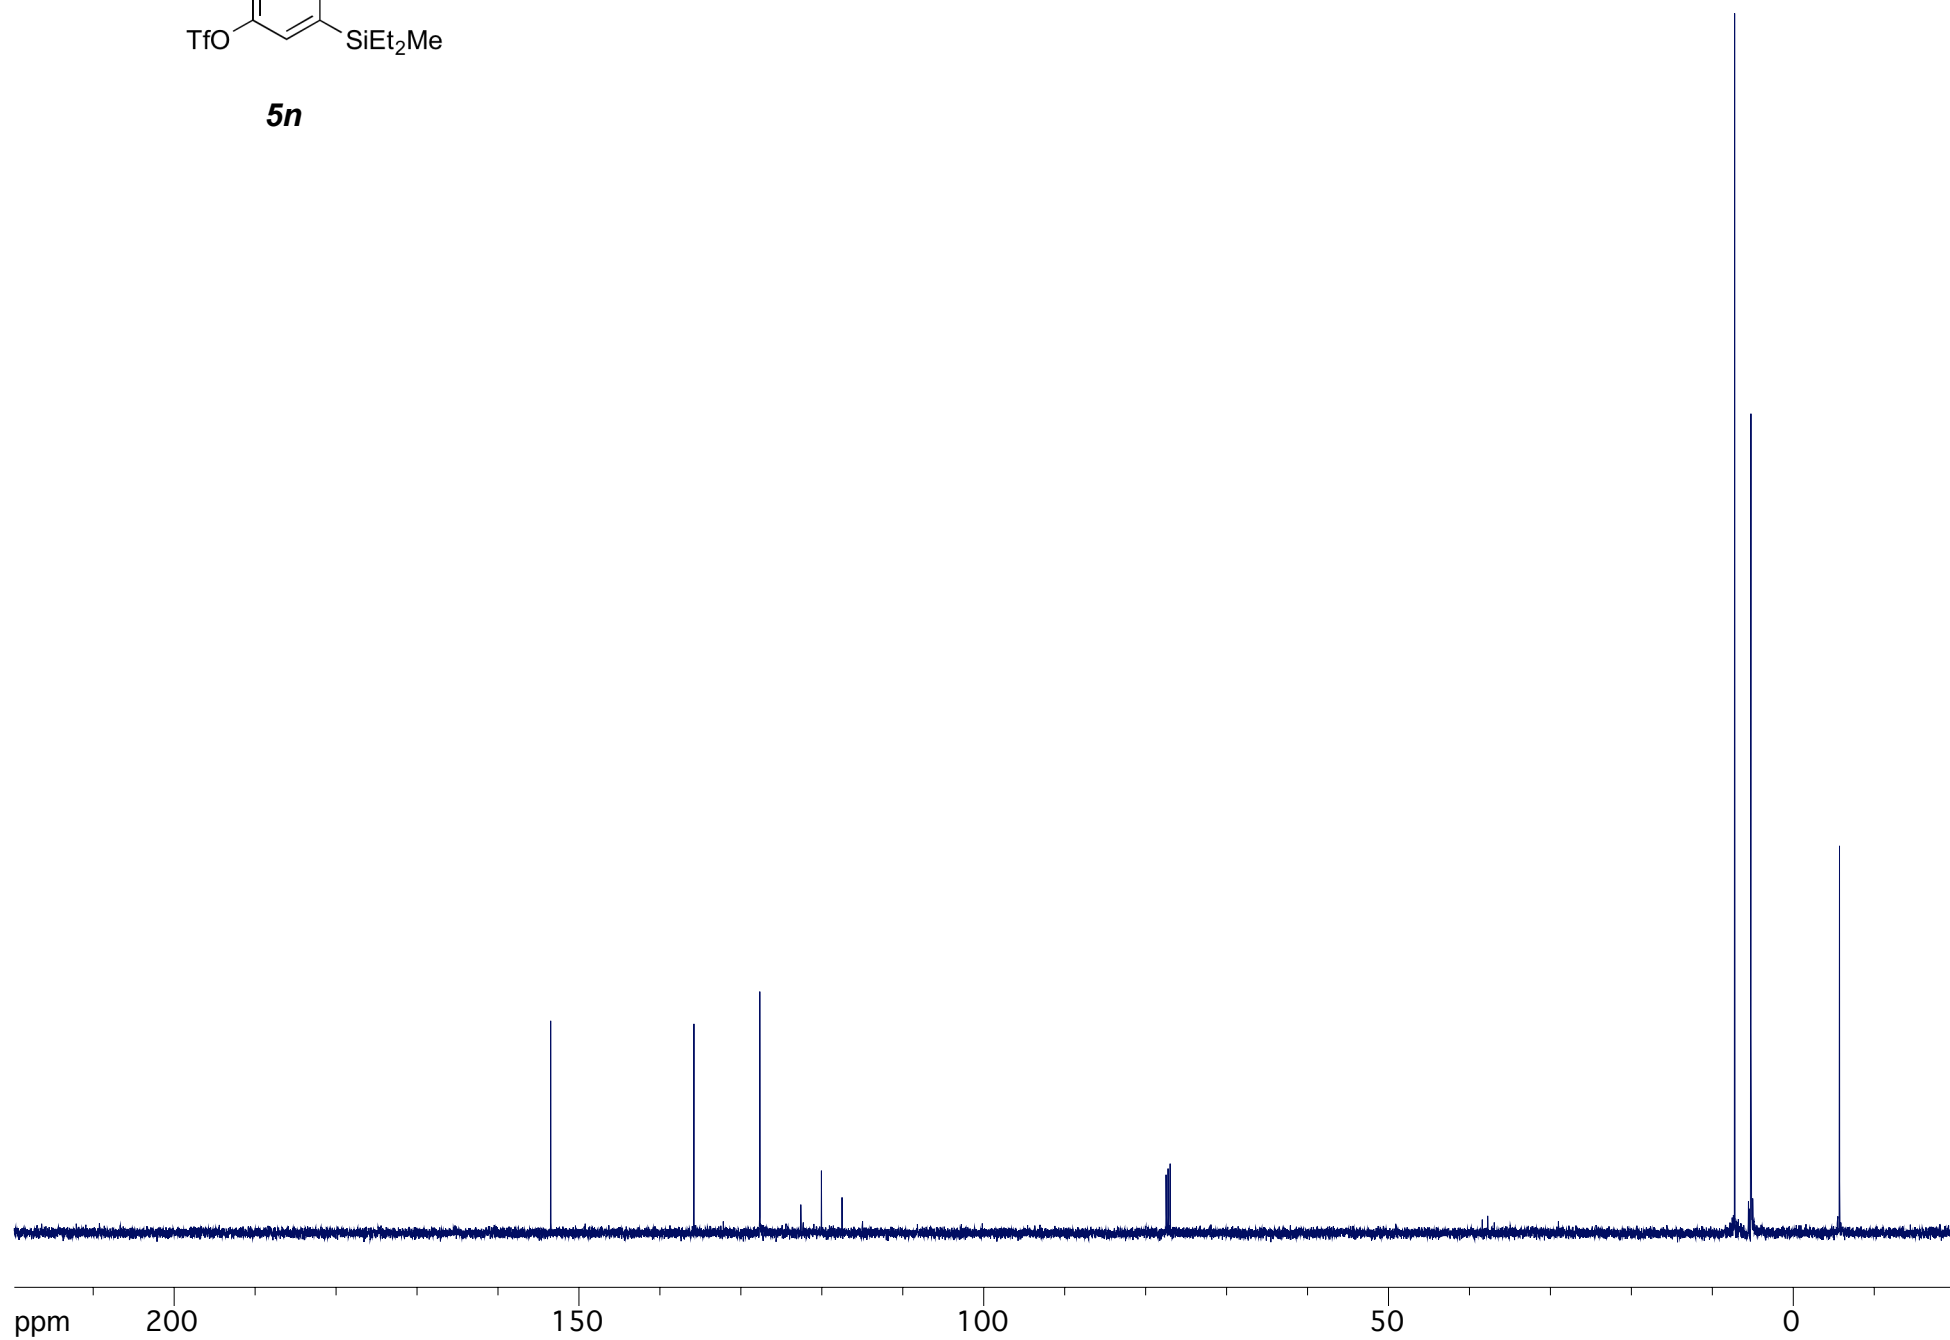

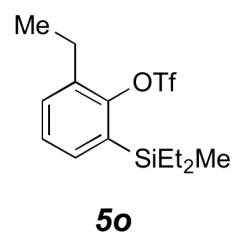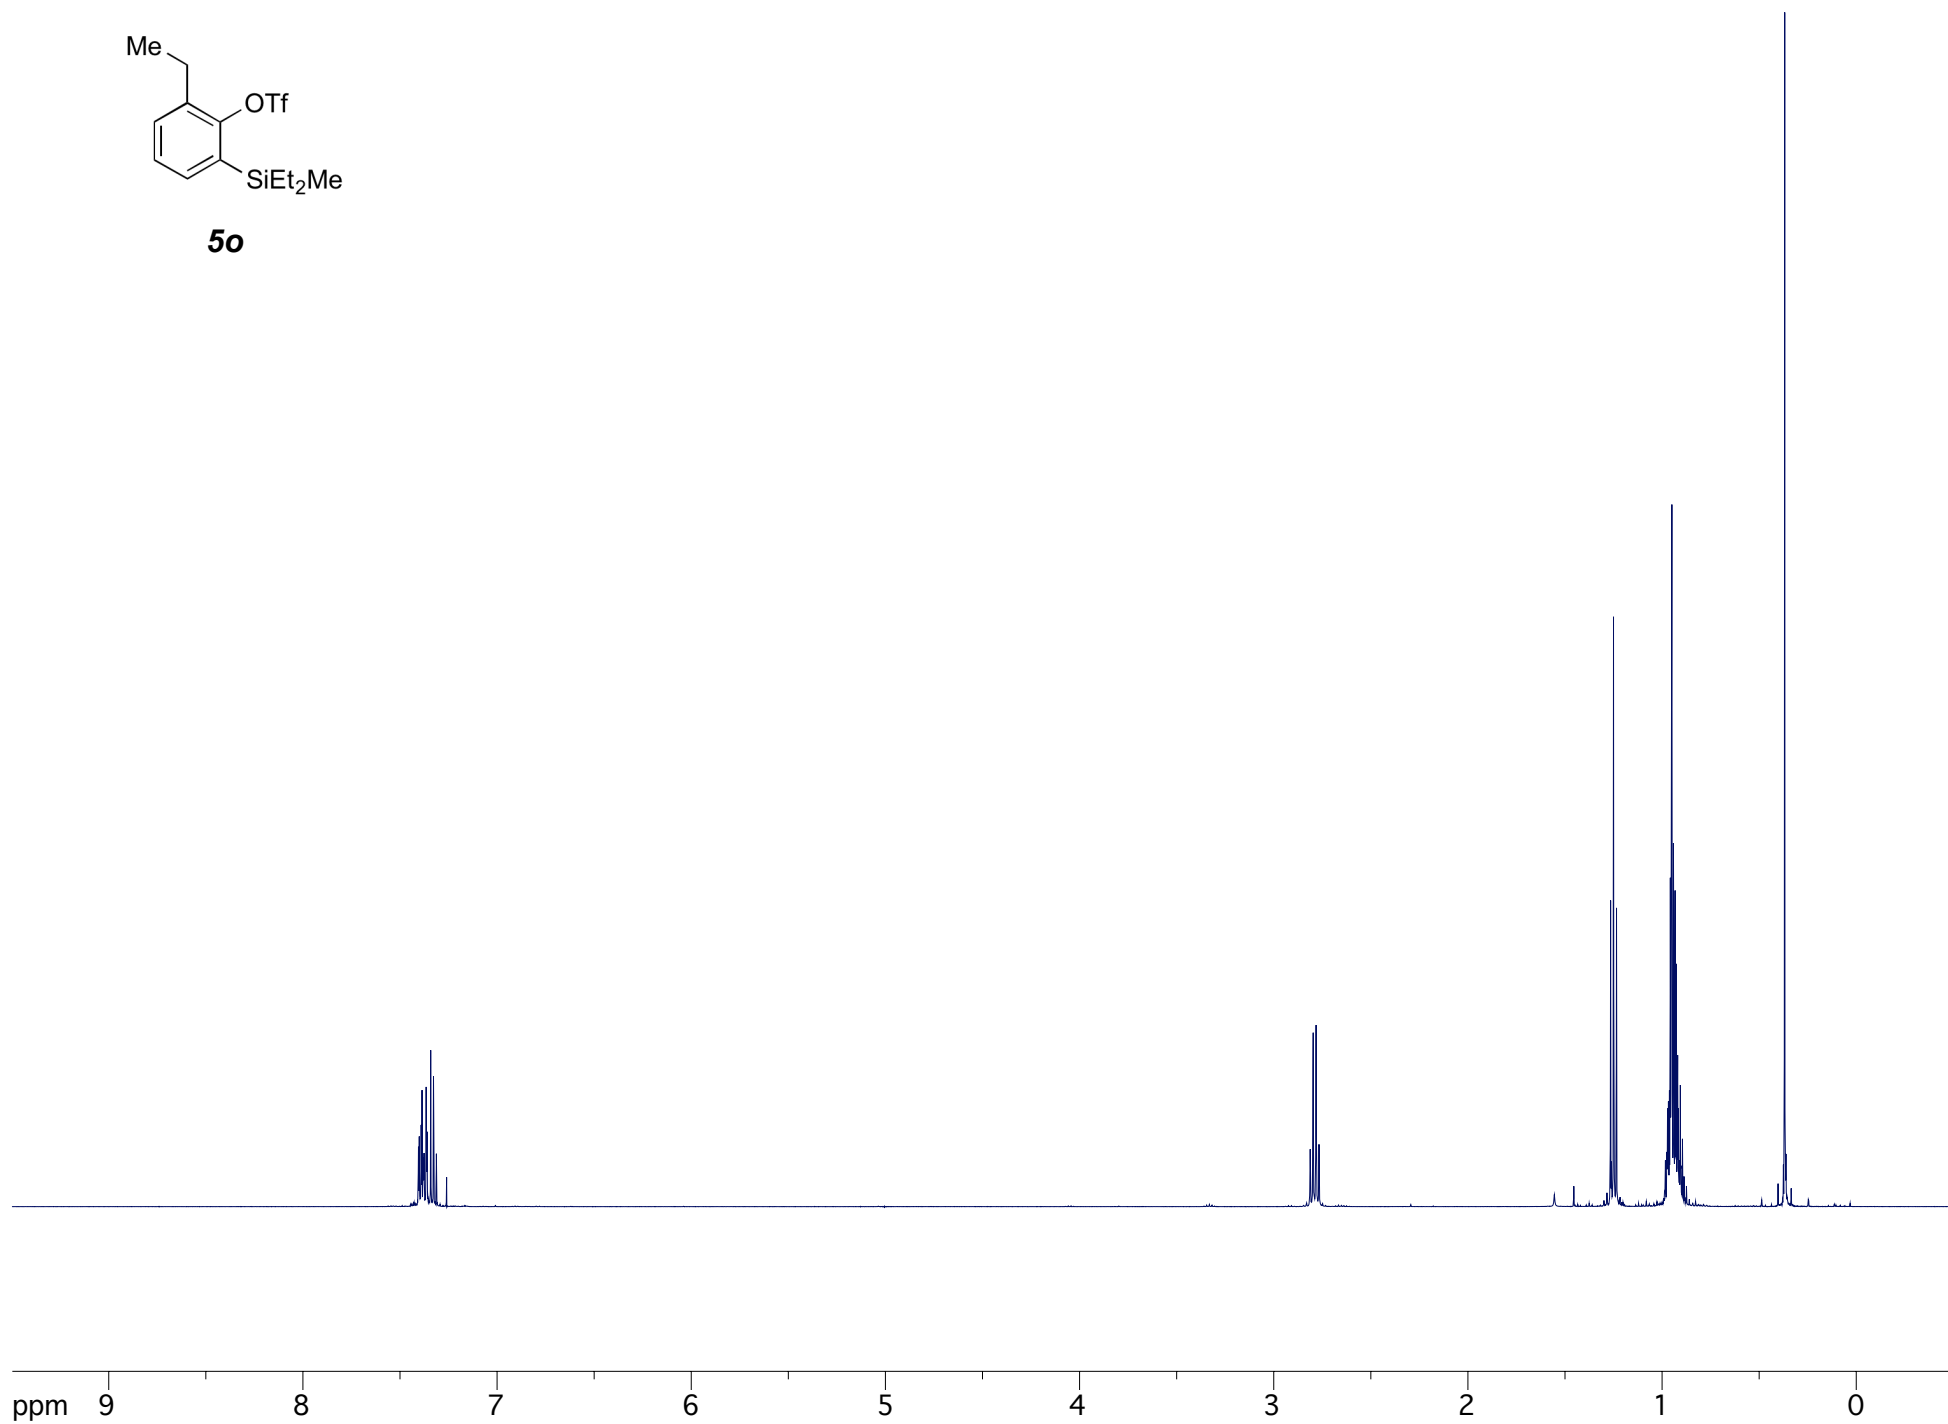



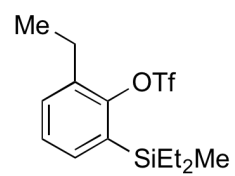**5o**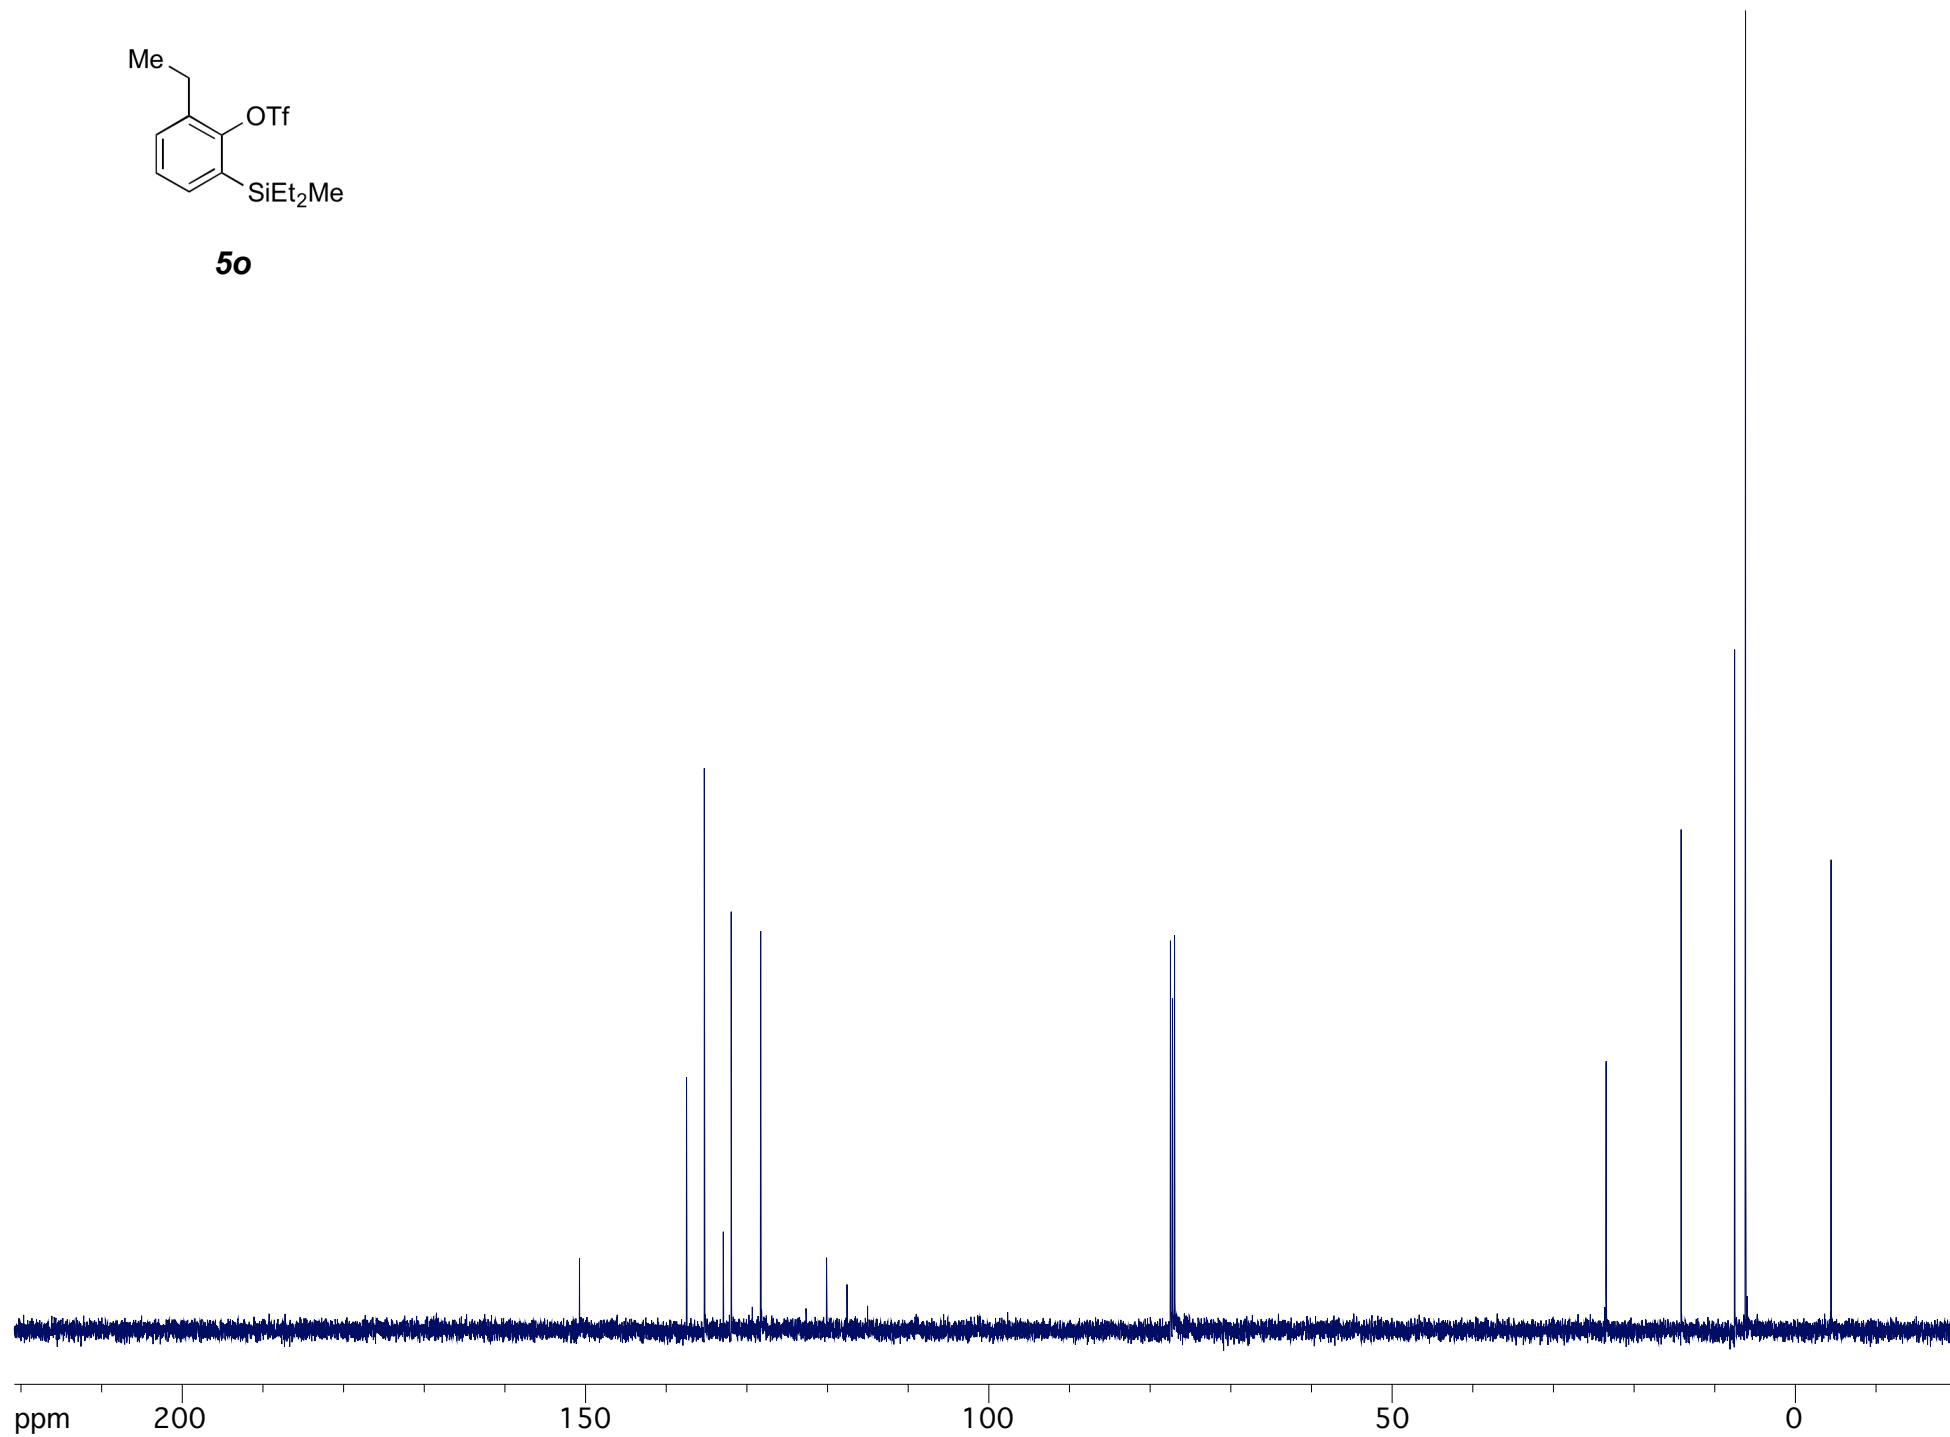

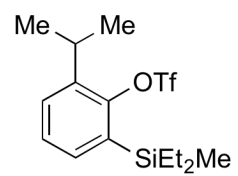**5p**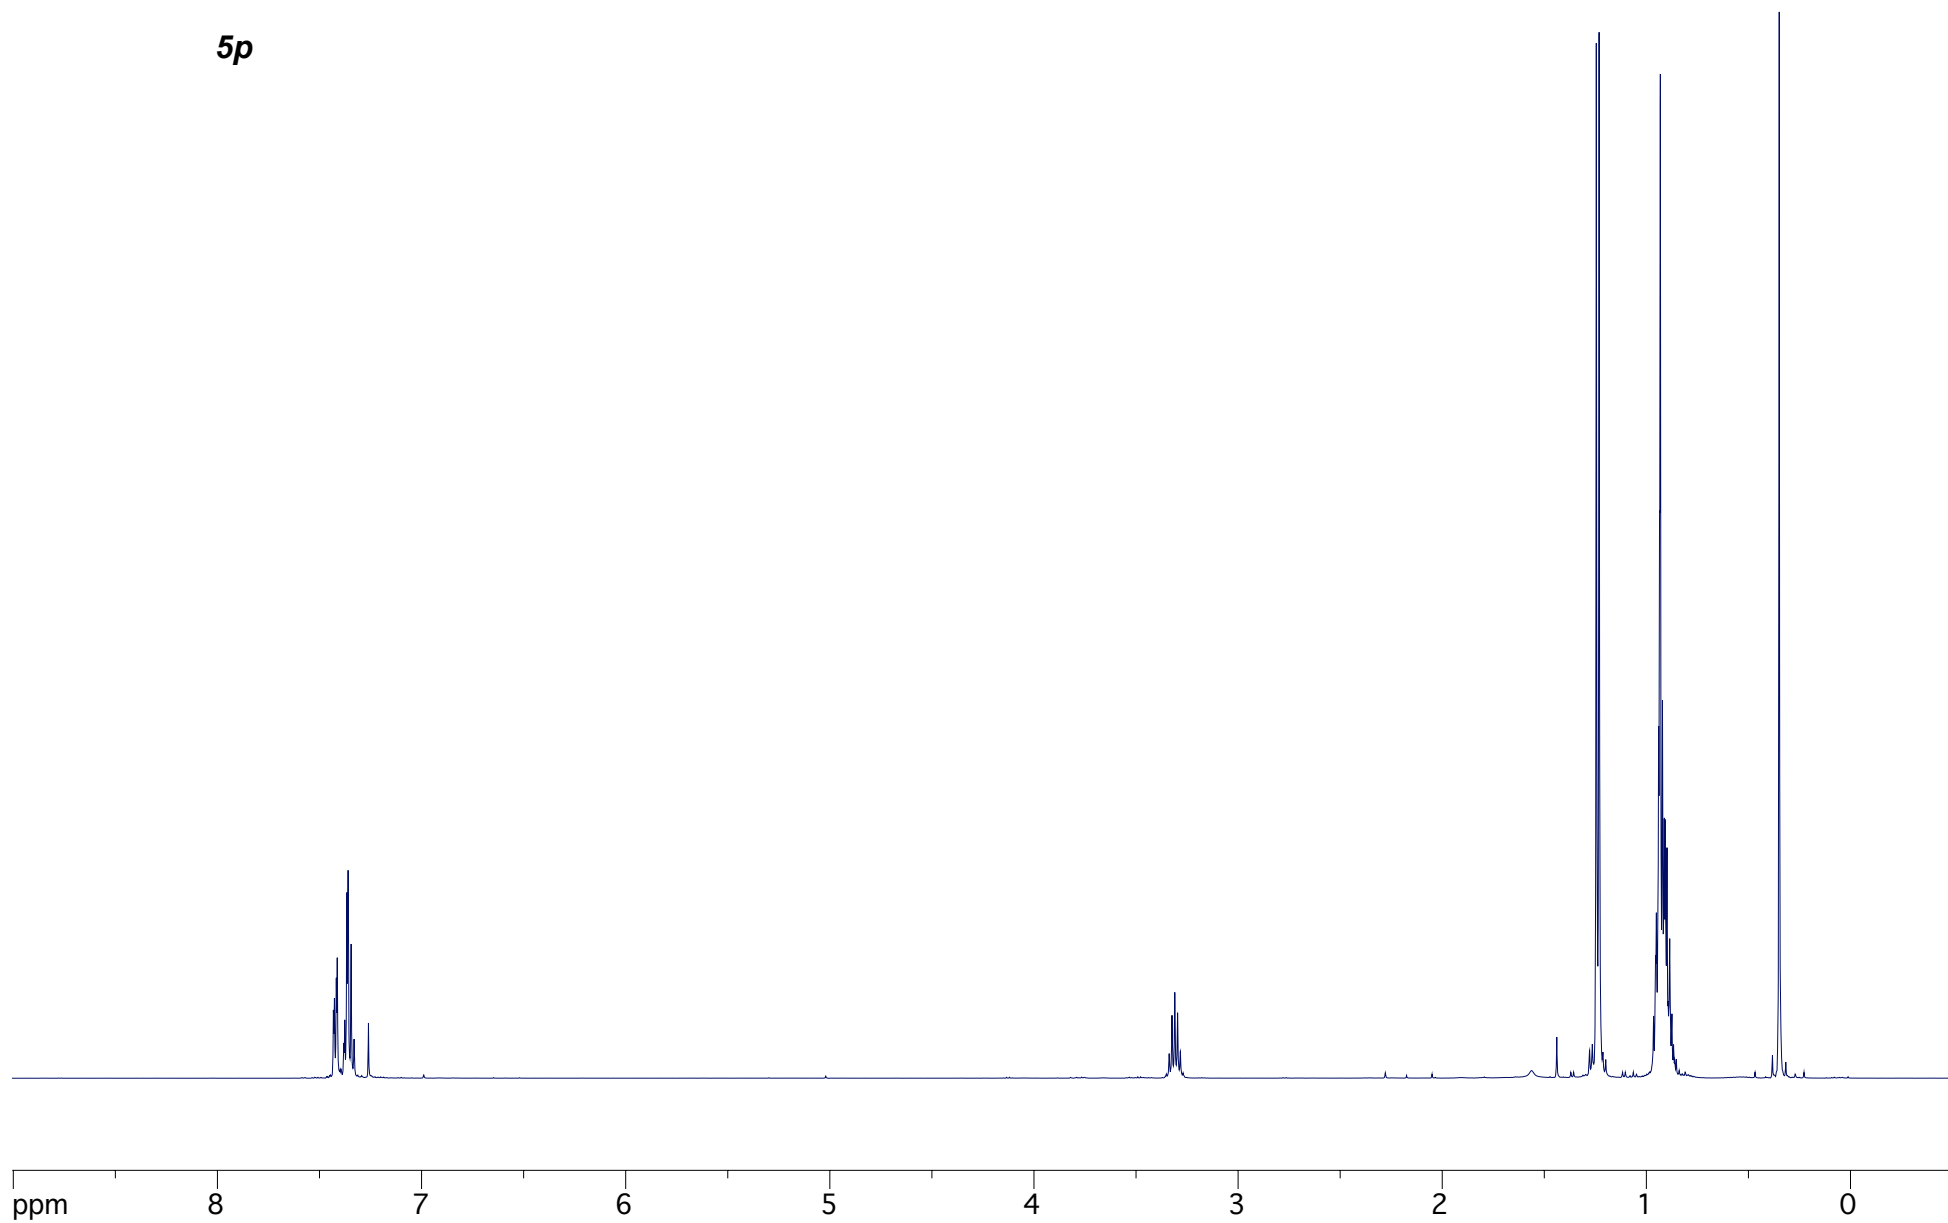

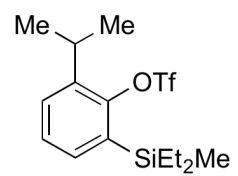**5p**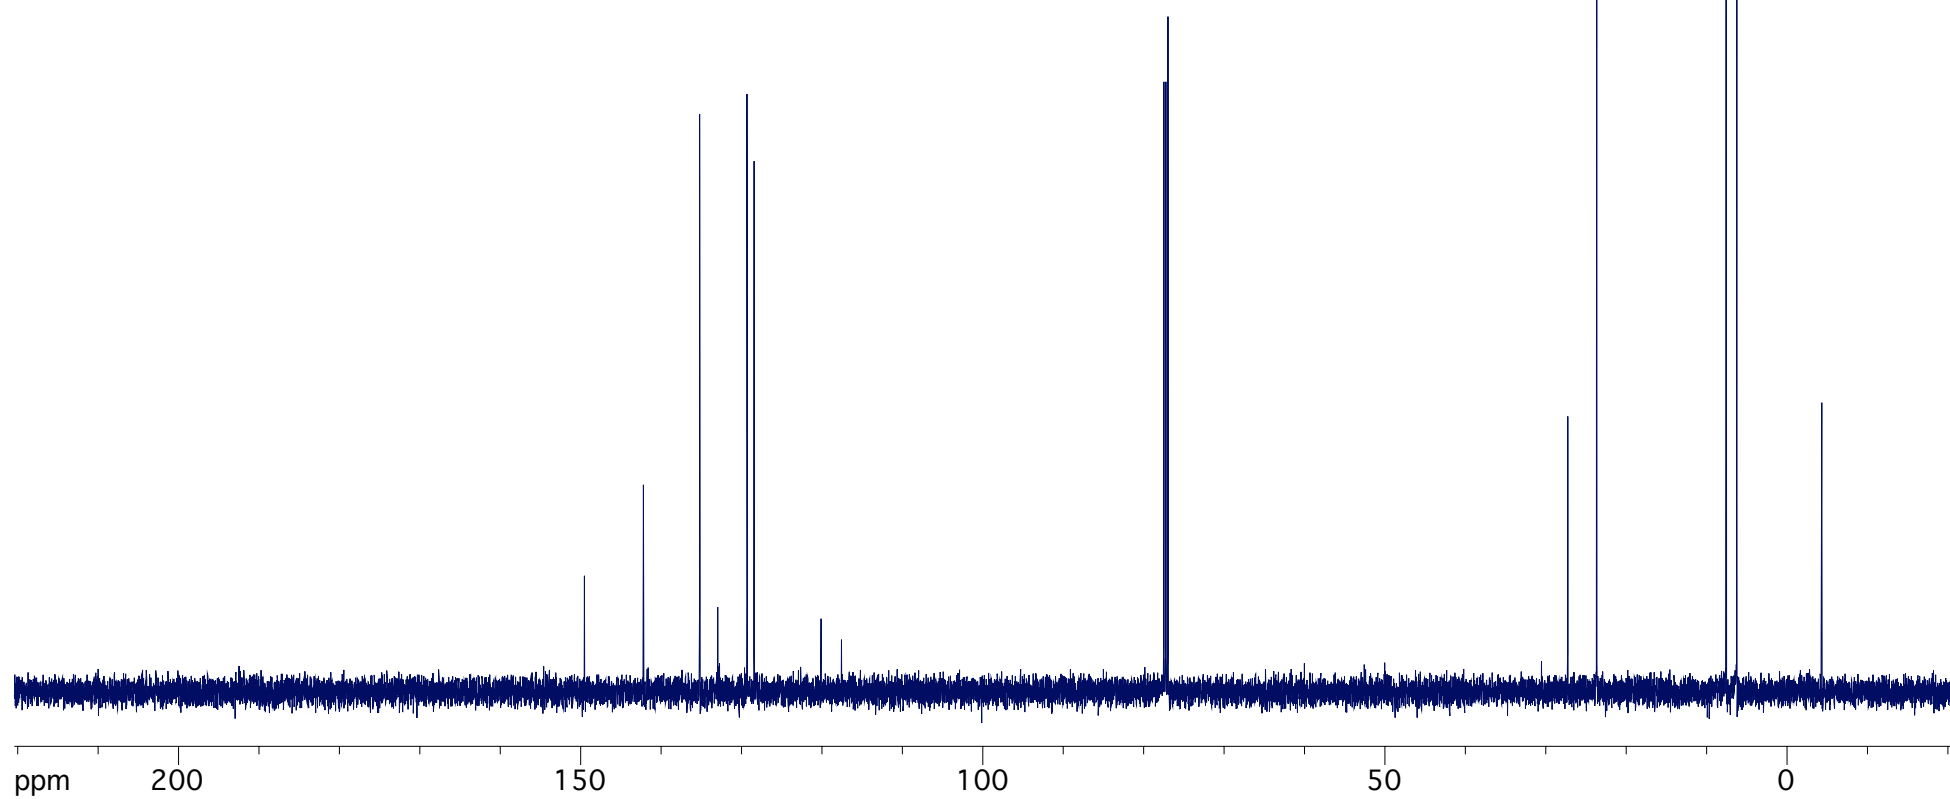

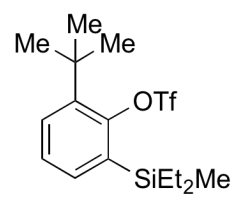**5q**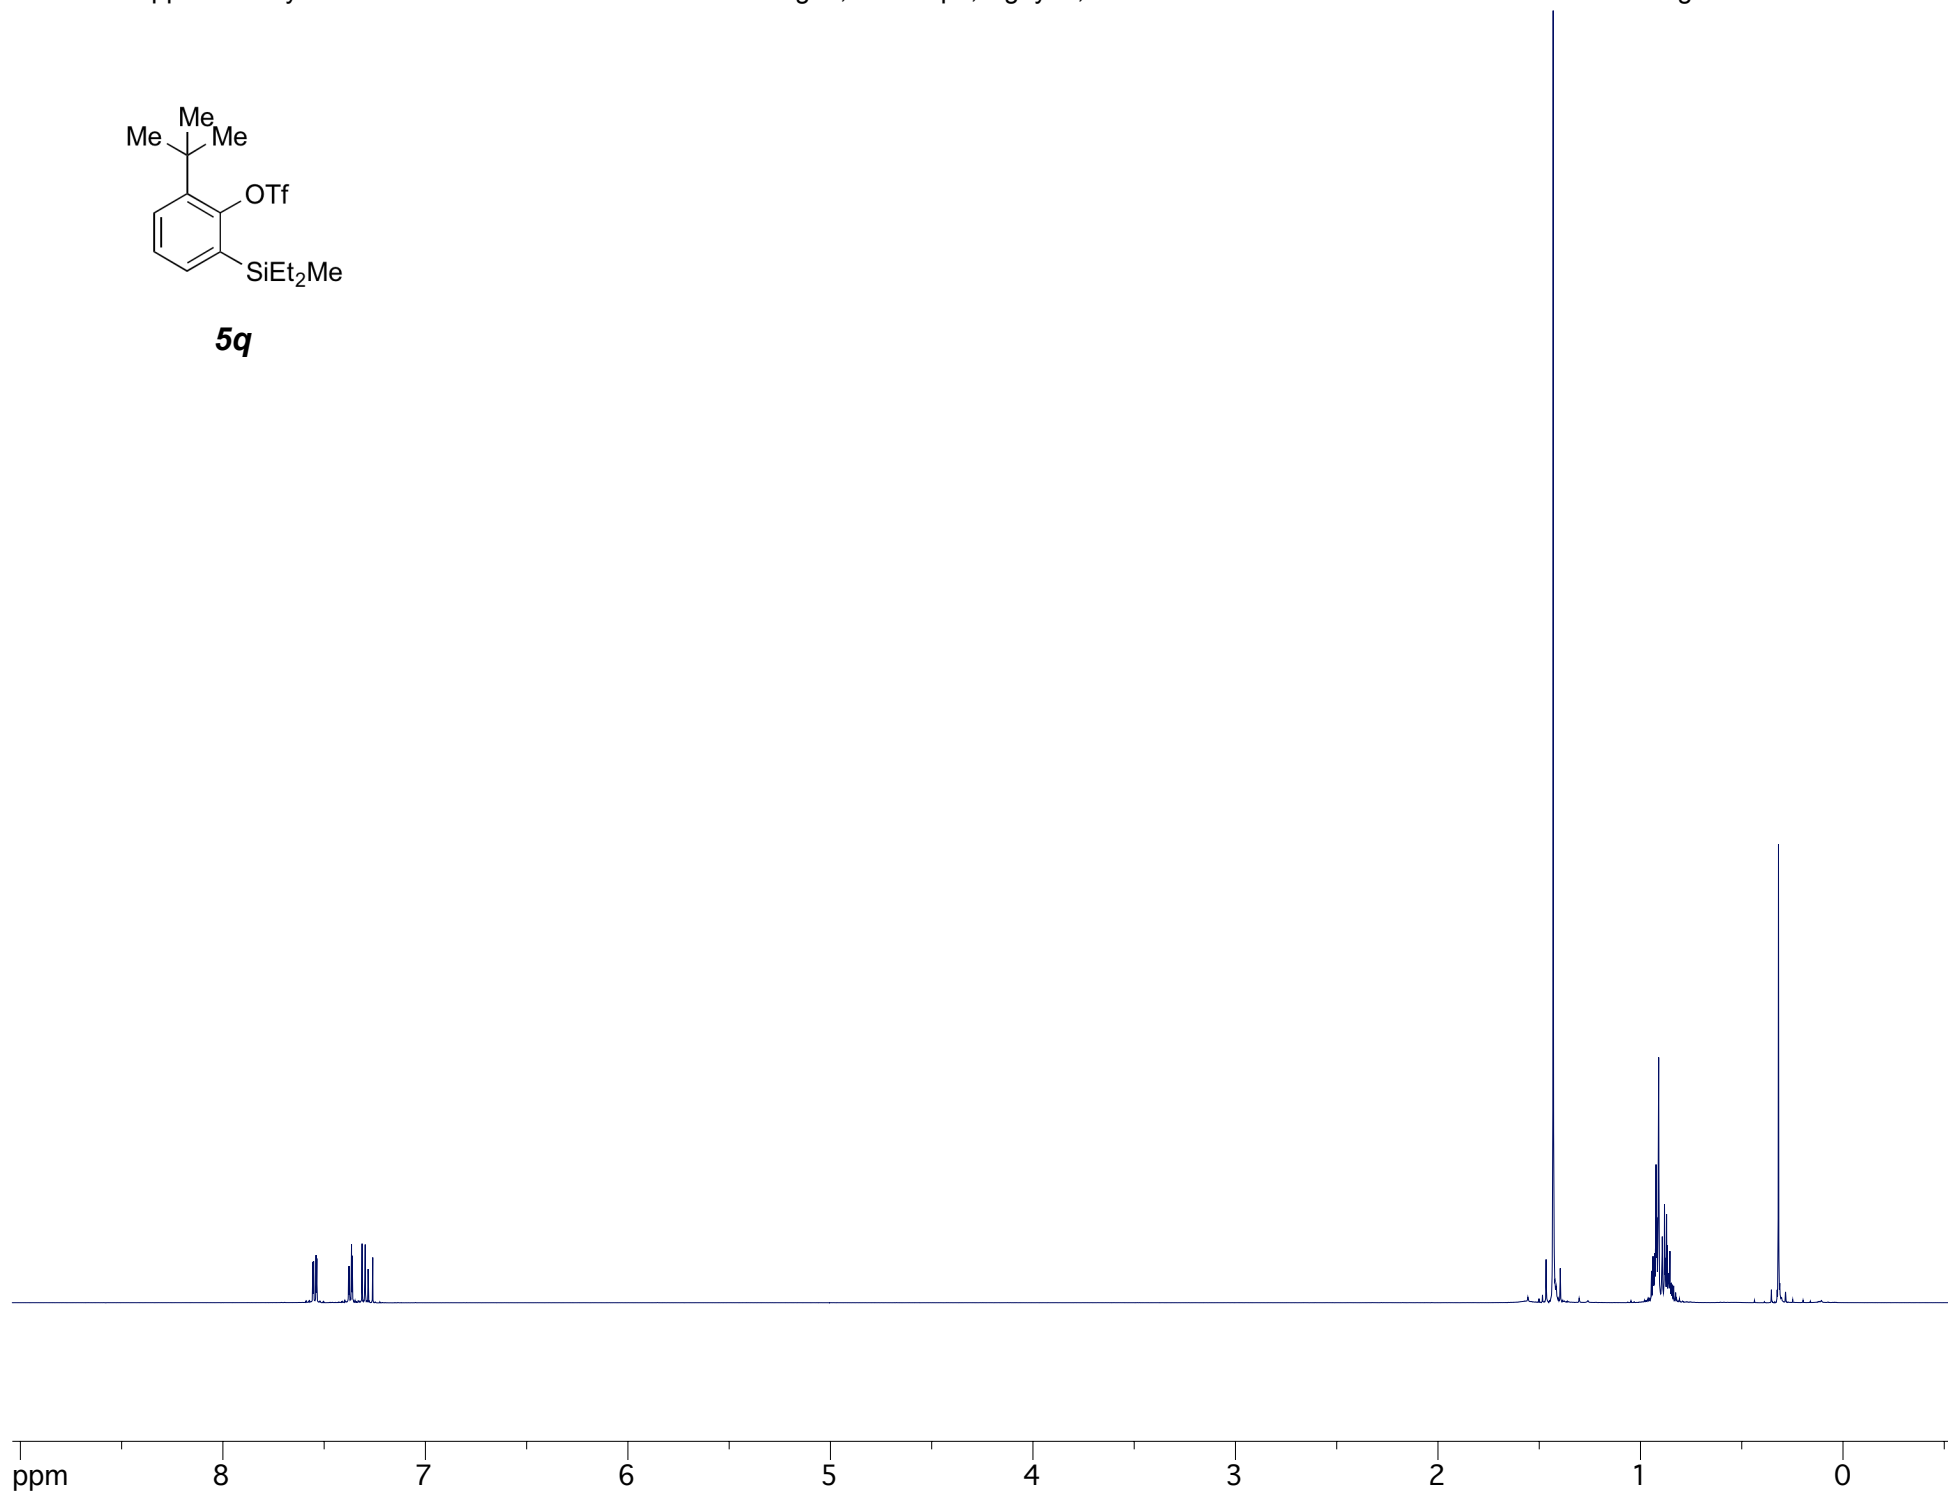

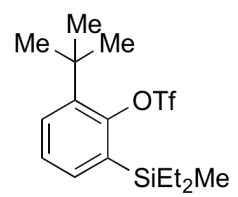**5q**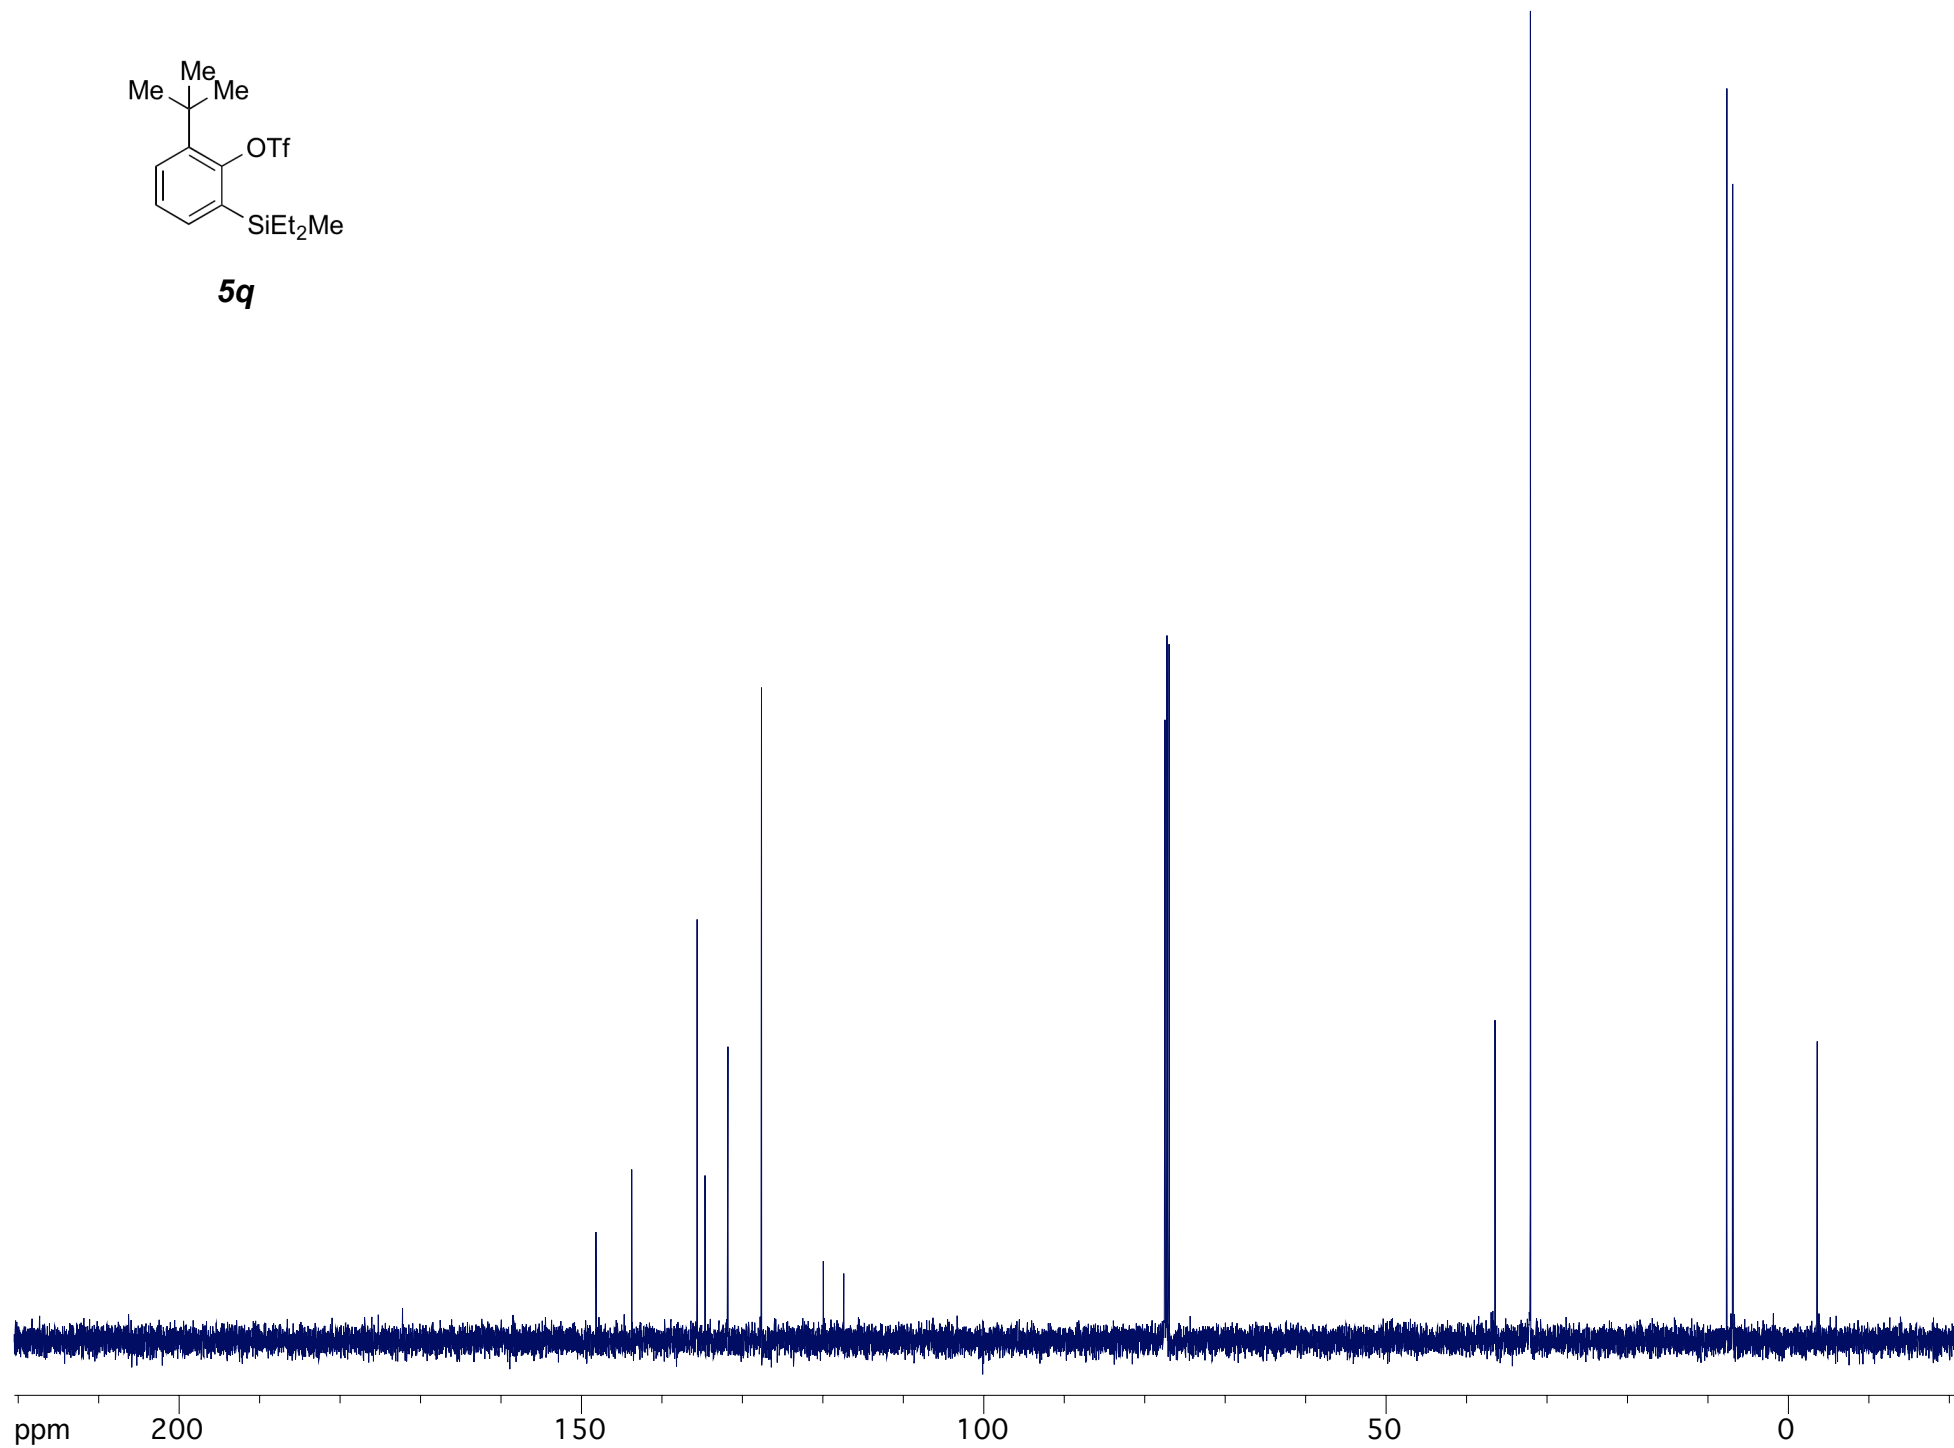

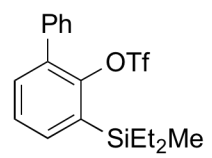**5r**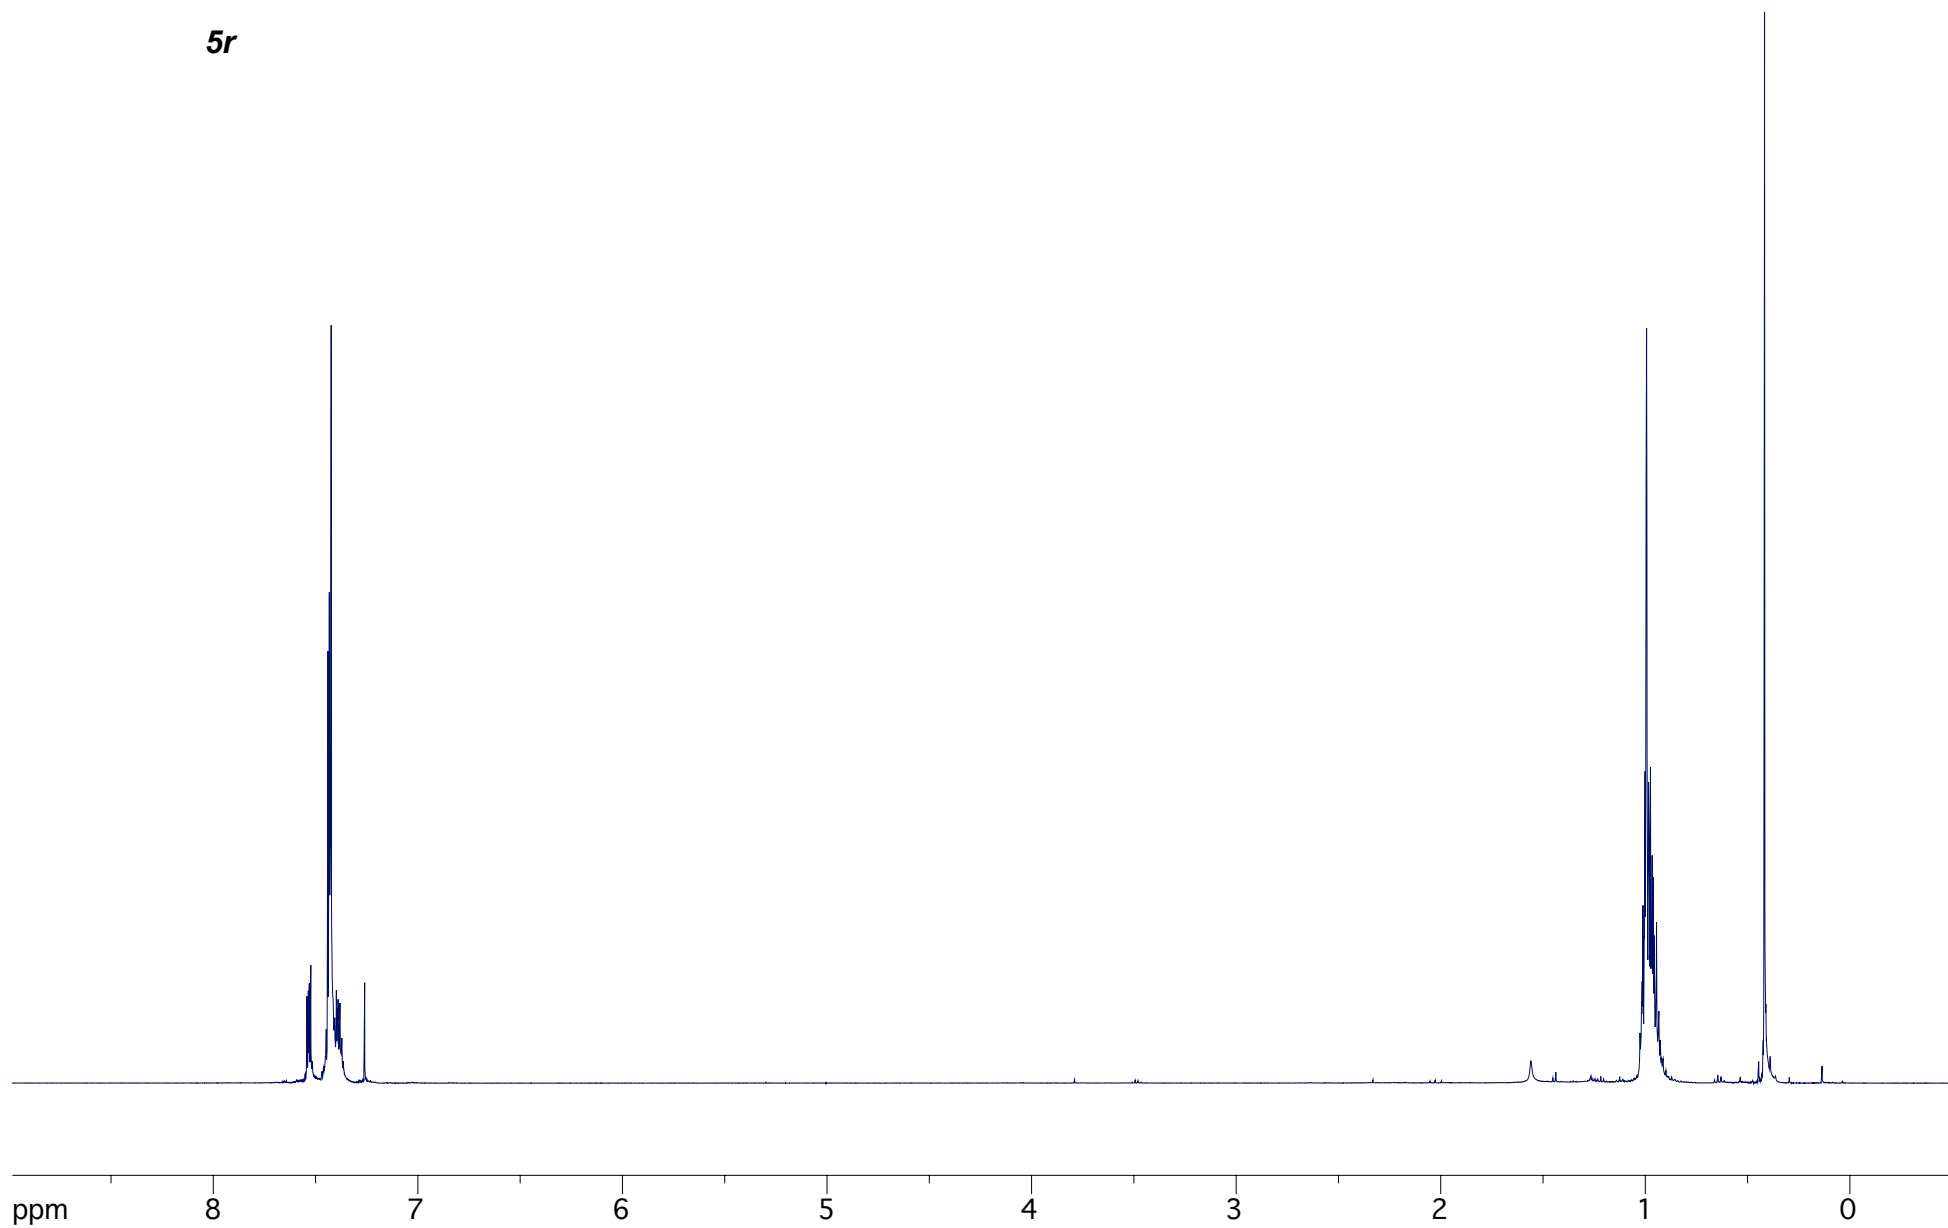

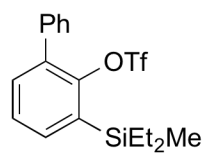**5r**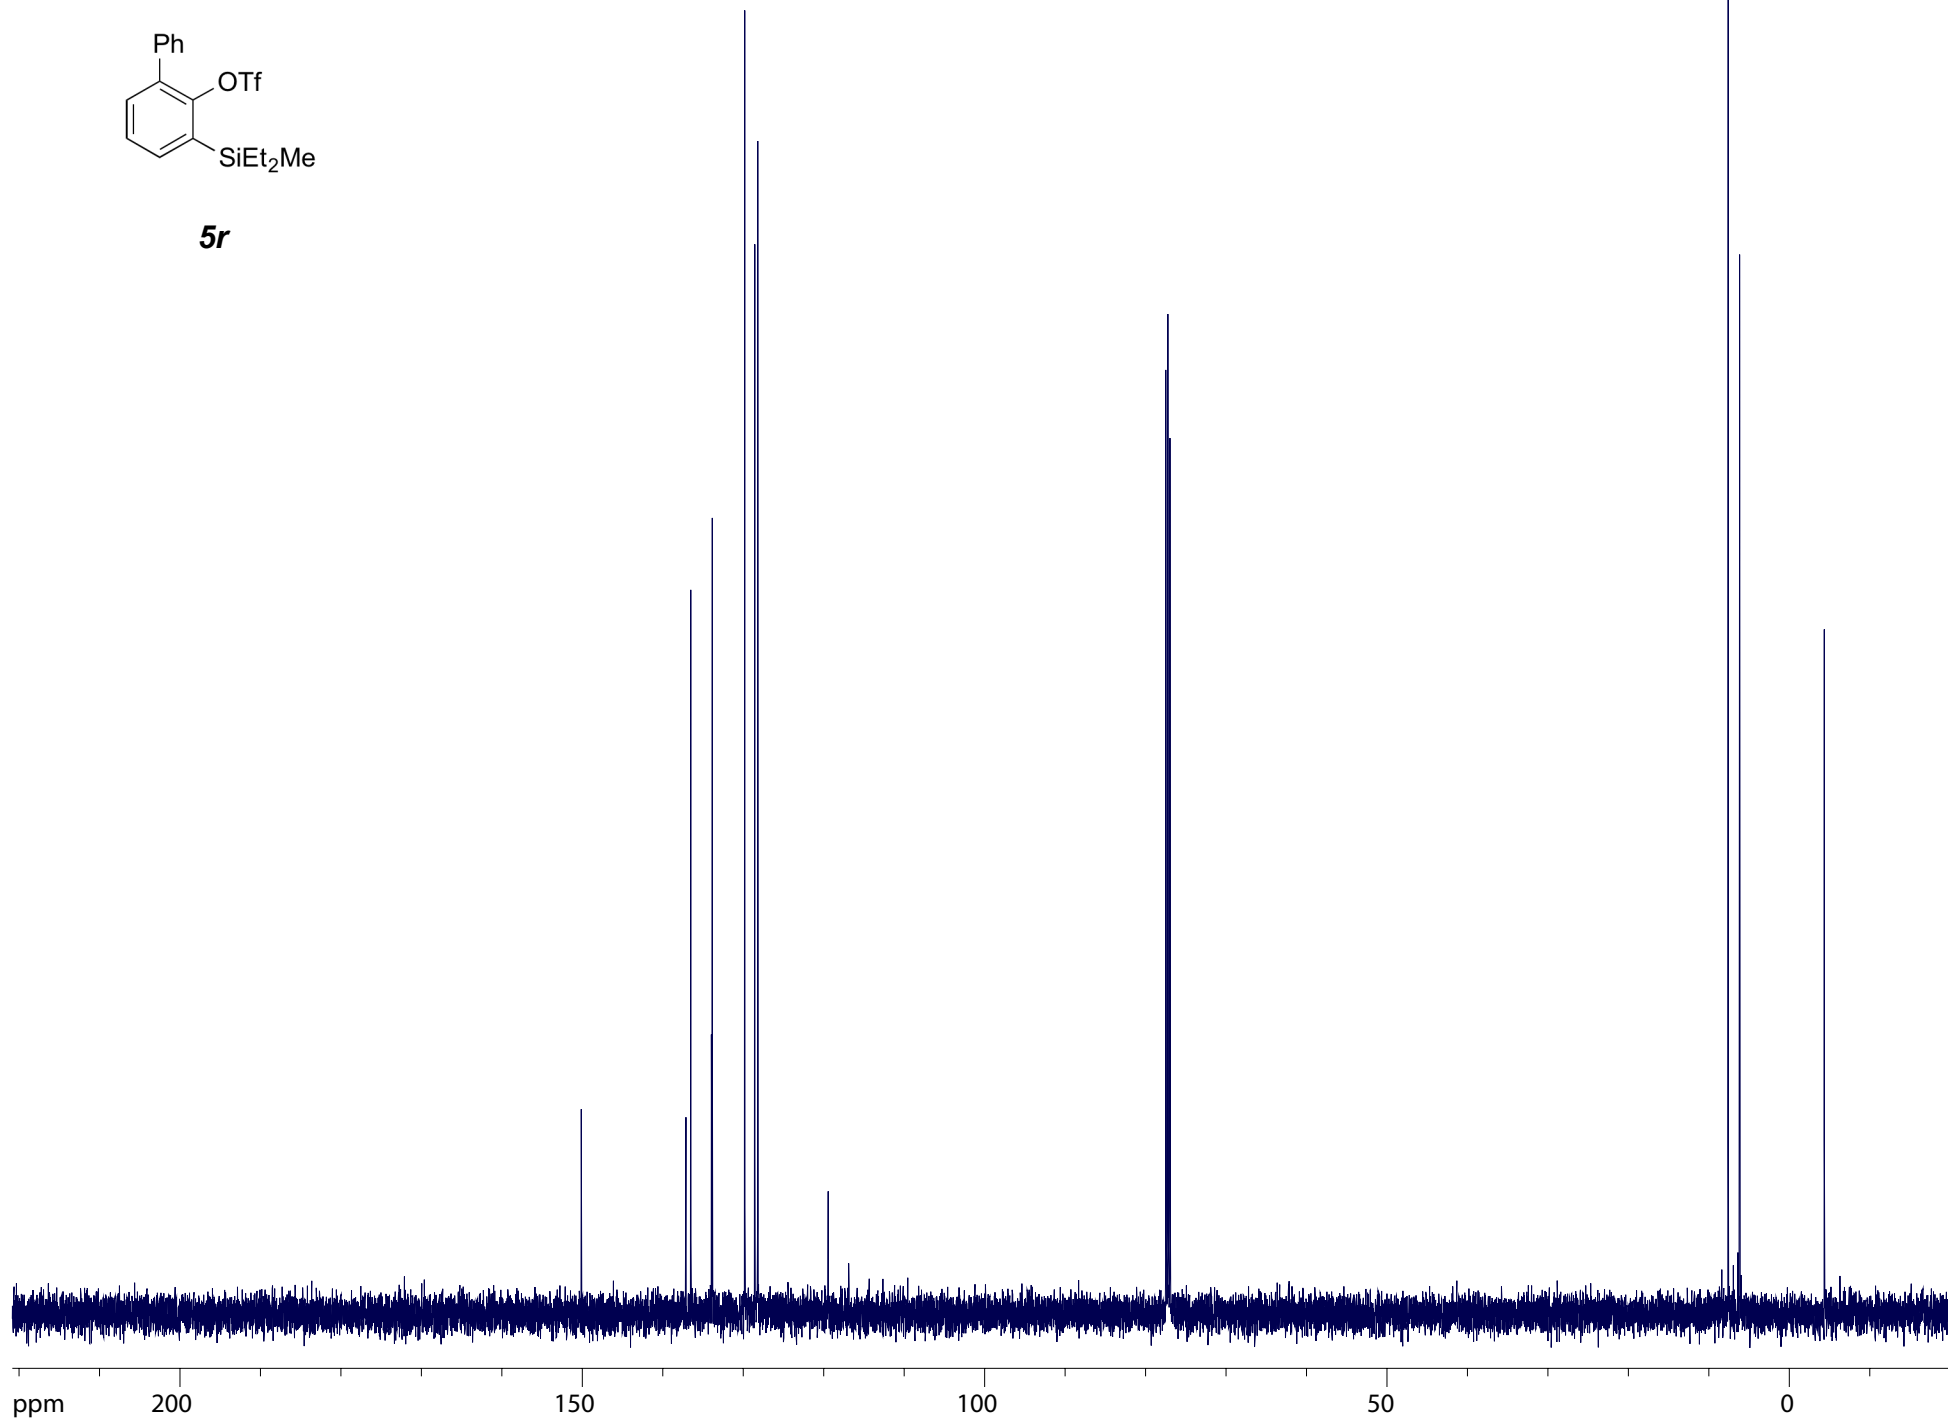

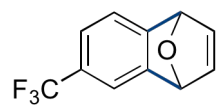**13d**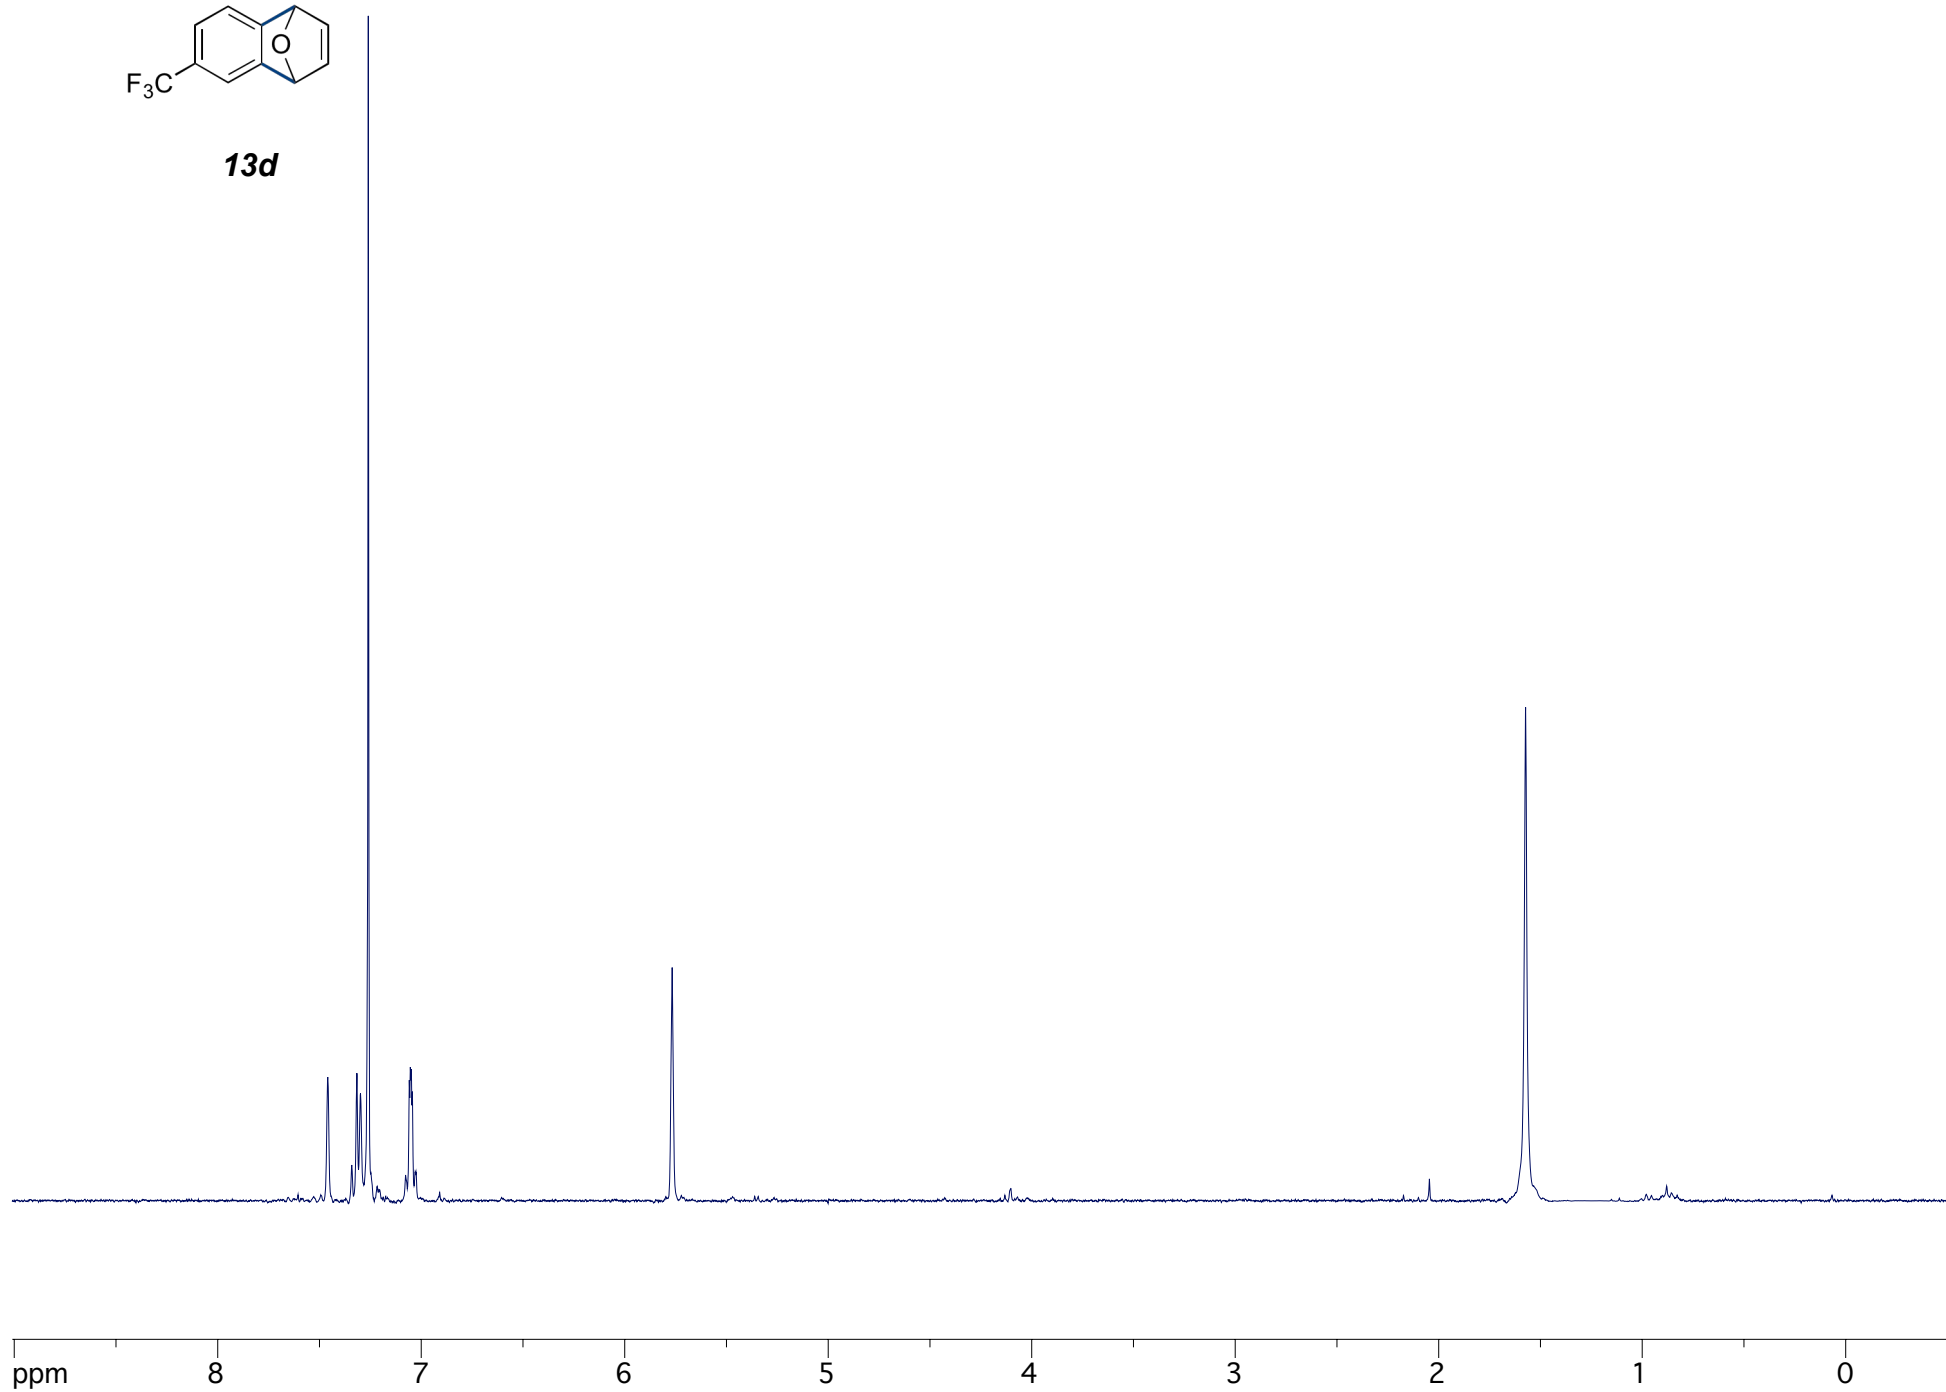



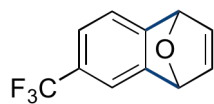**13d**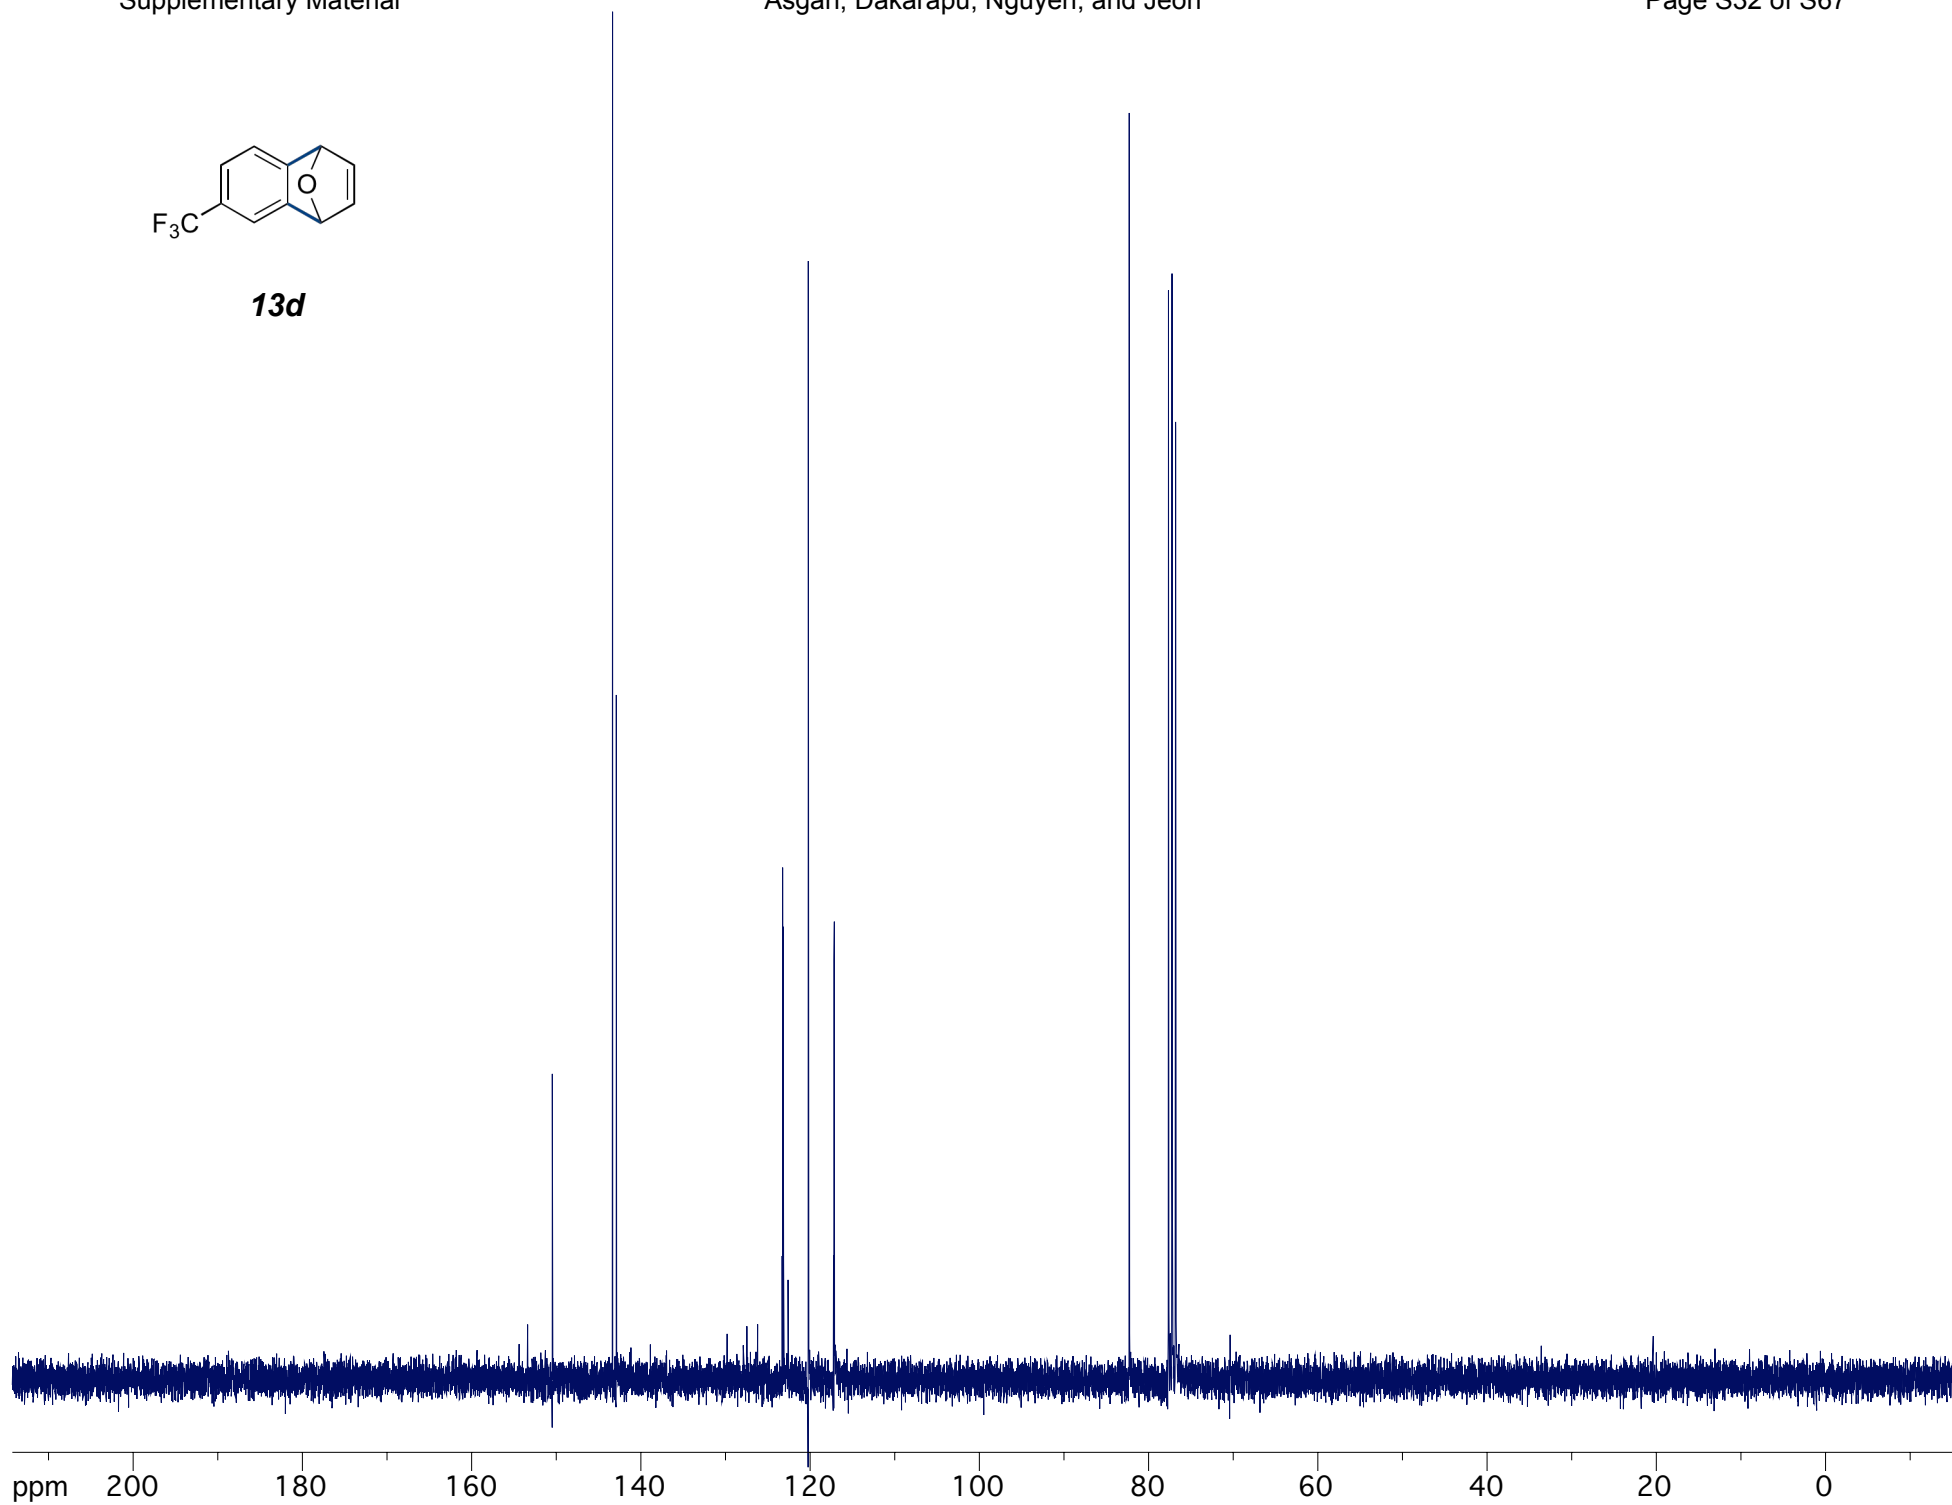

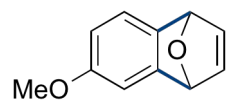**13e**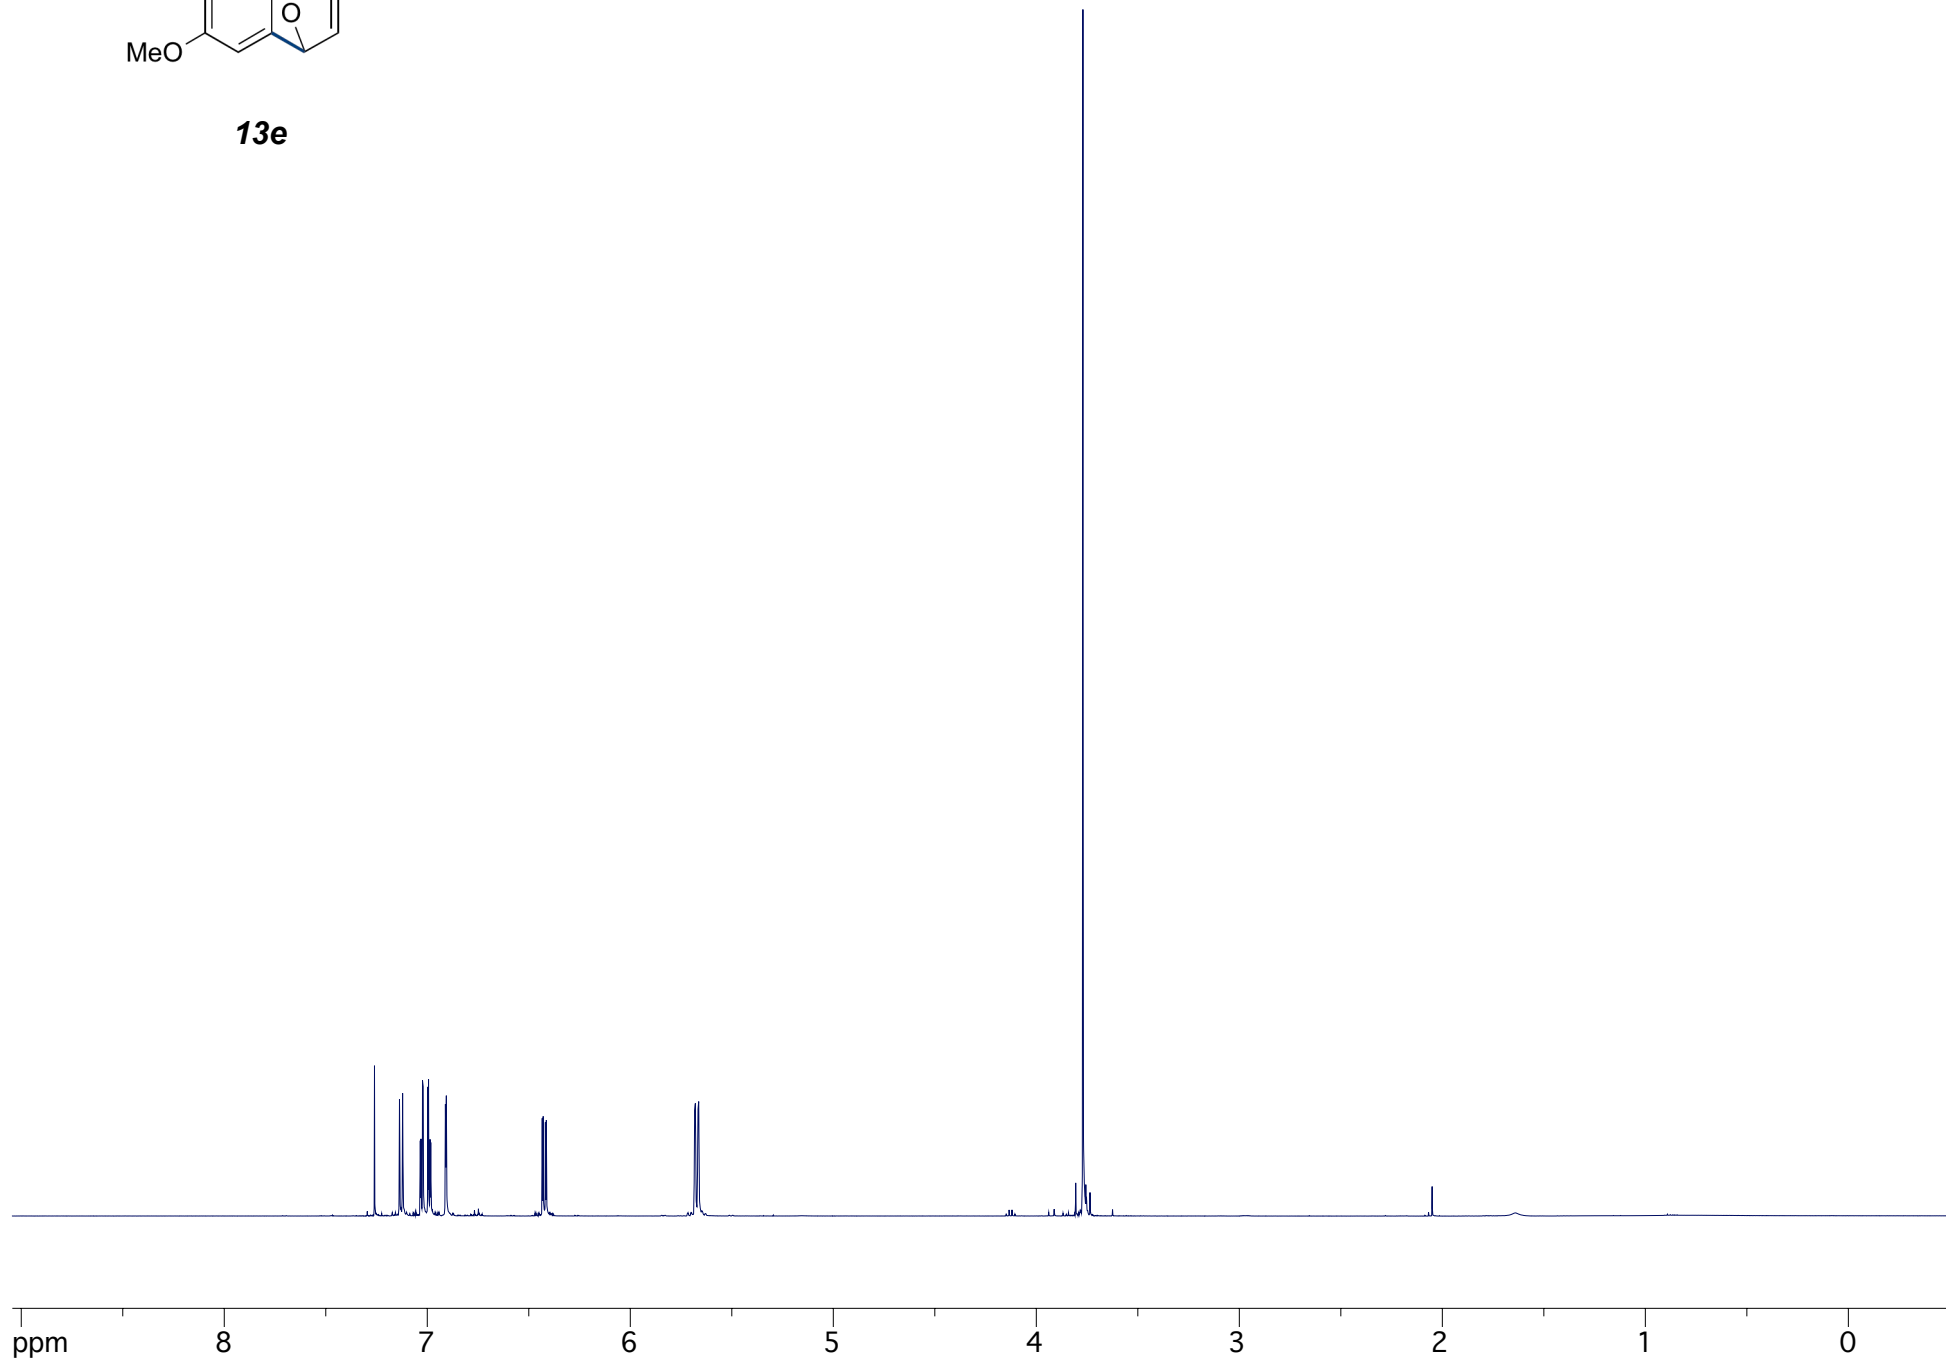

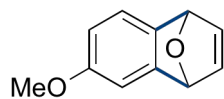**13e**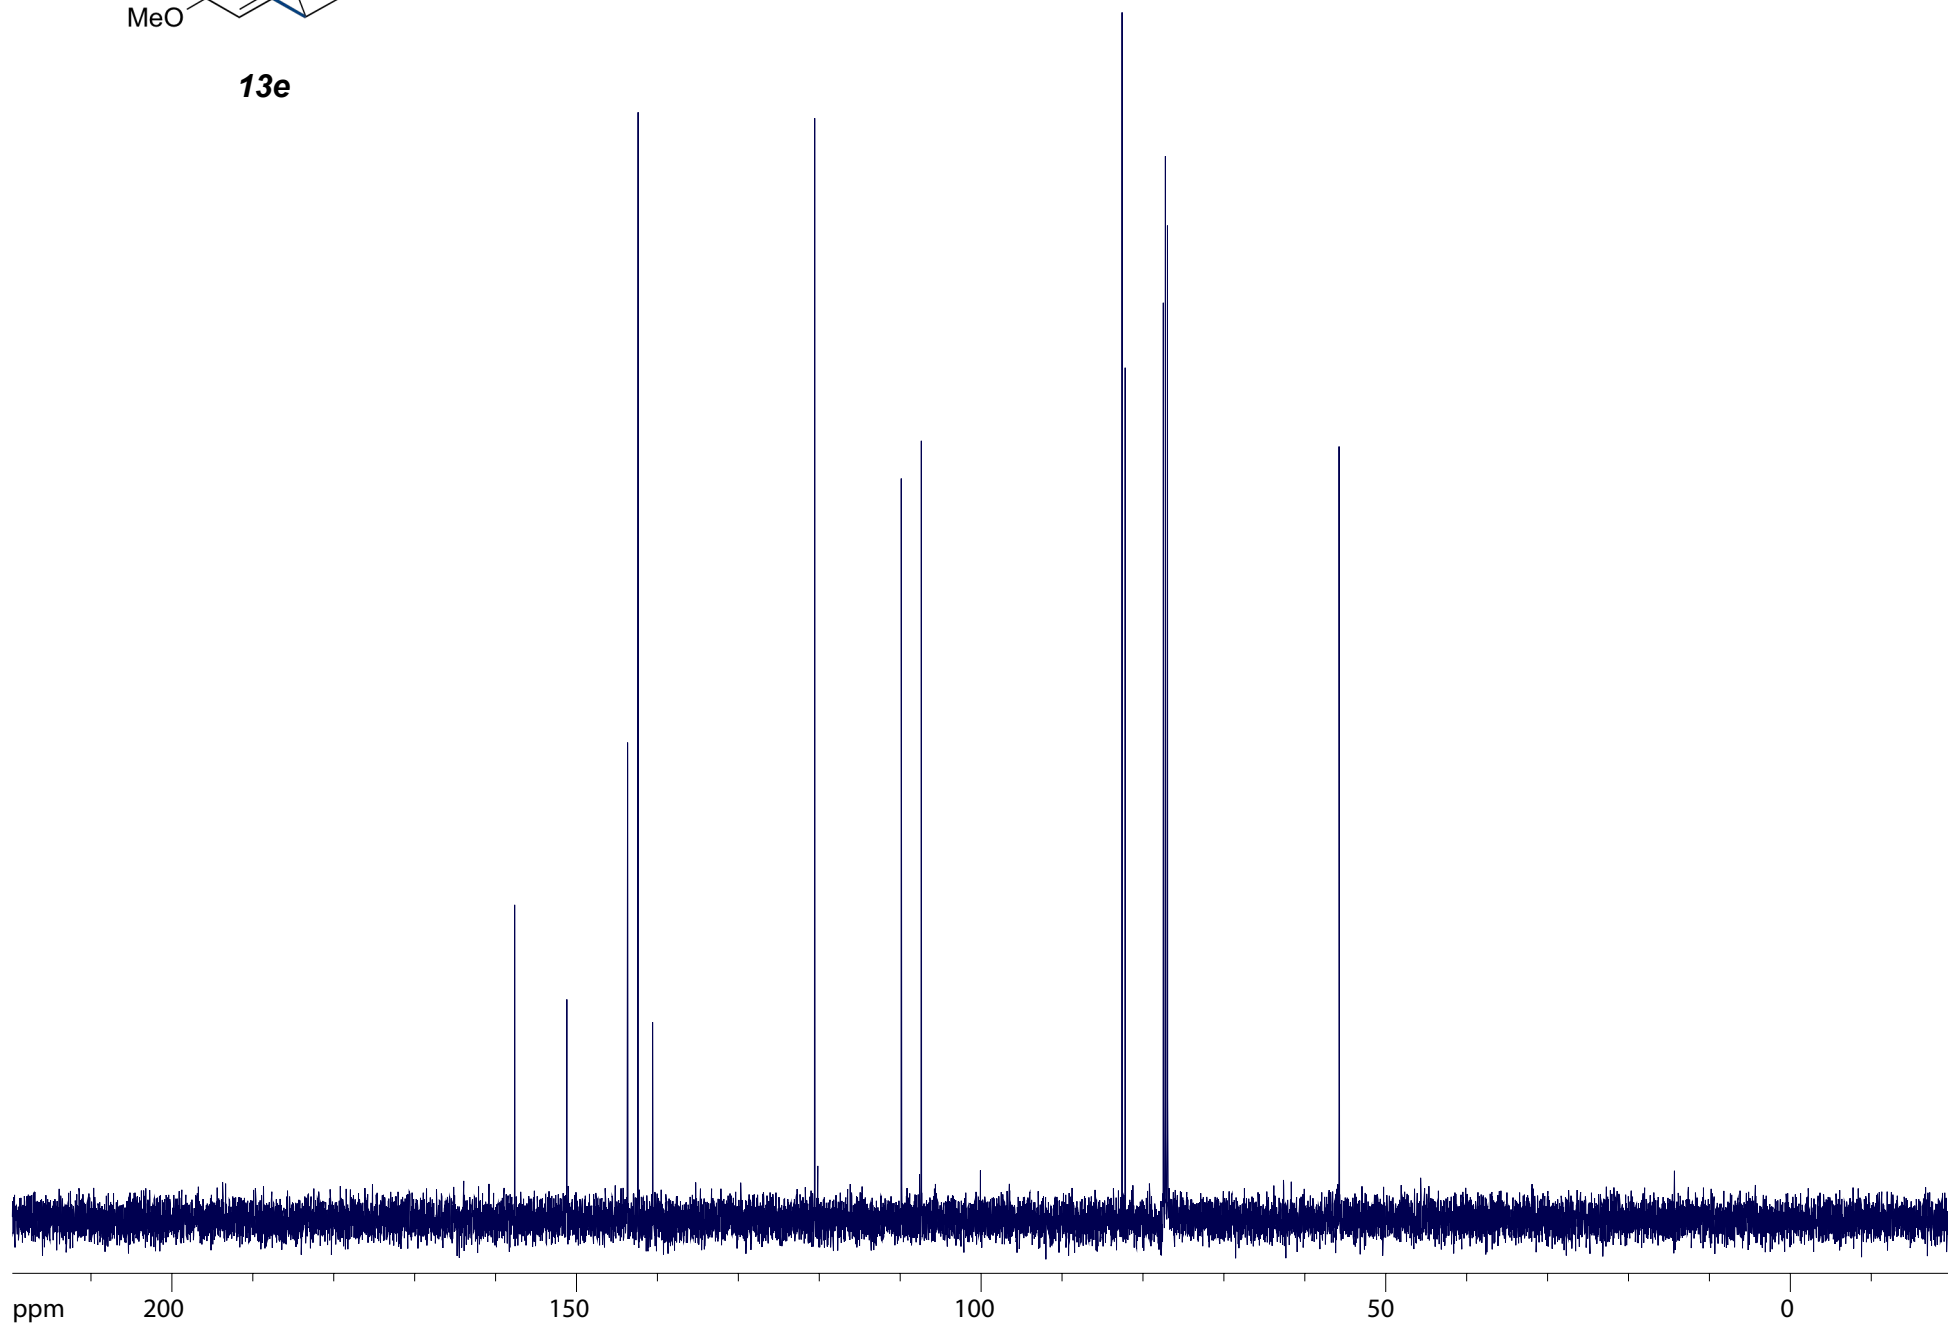

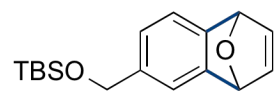**13f**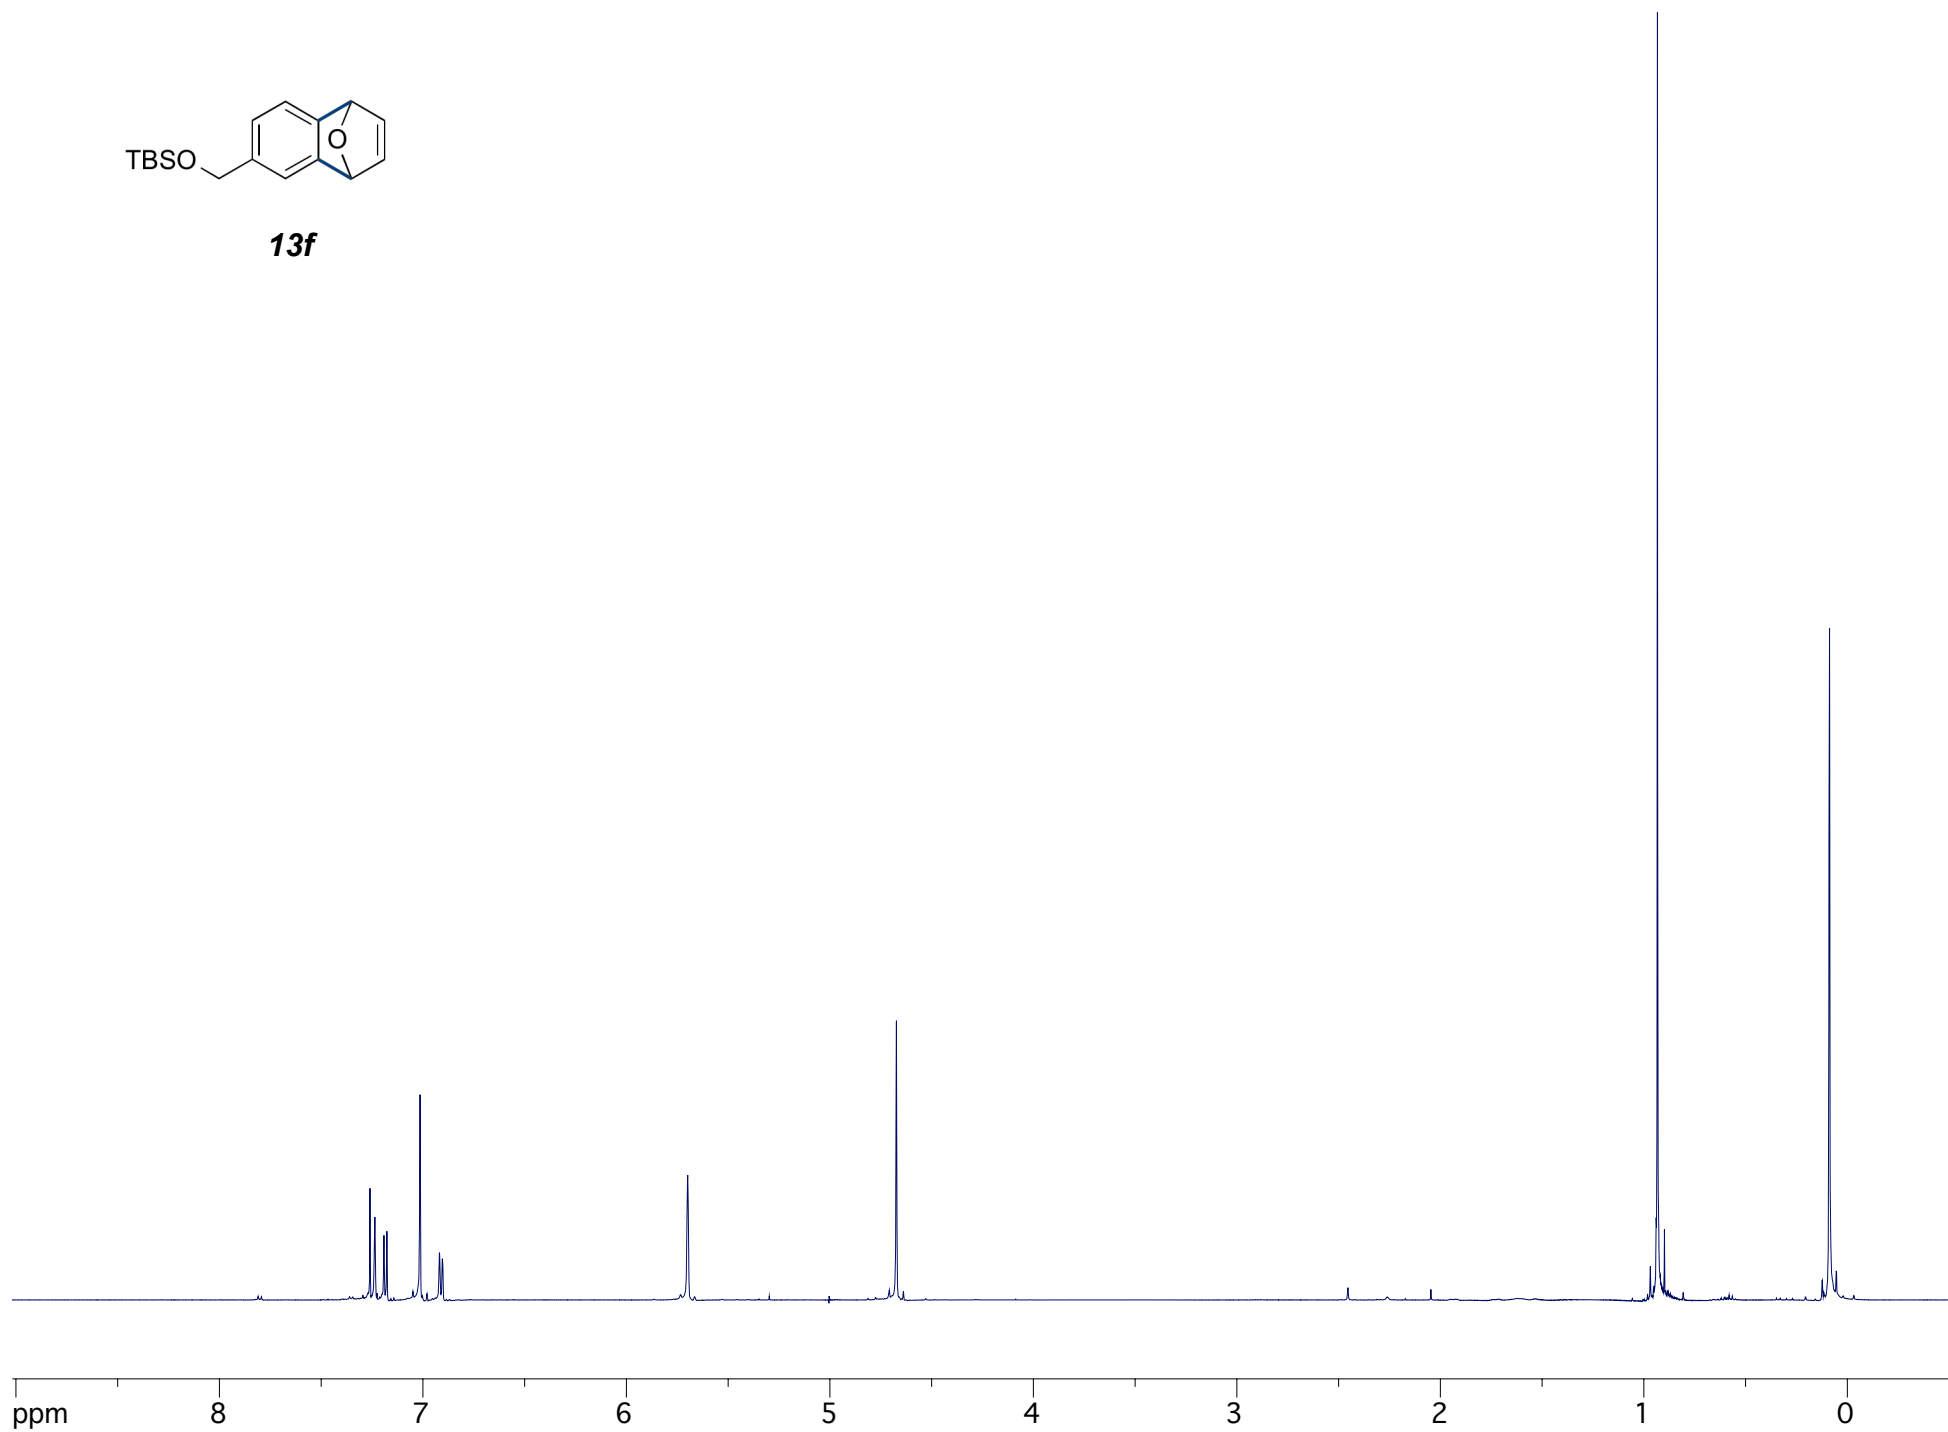



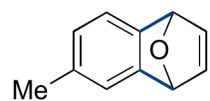**13g**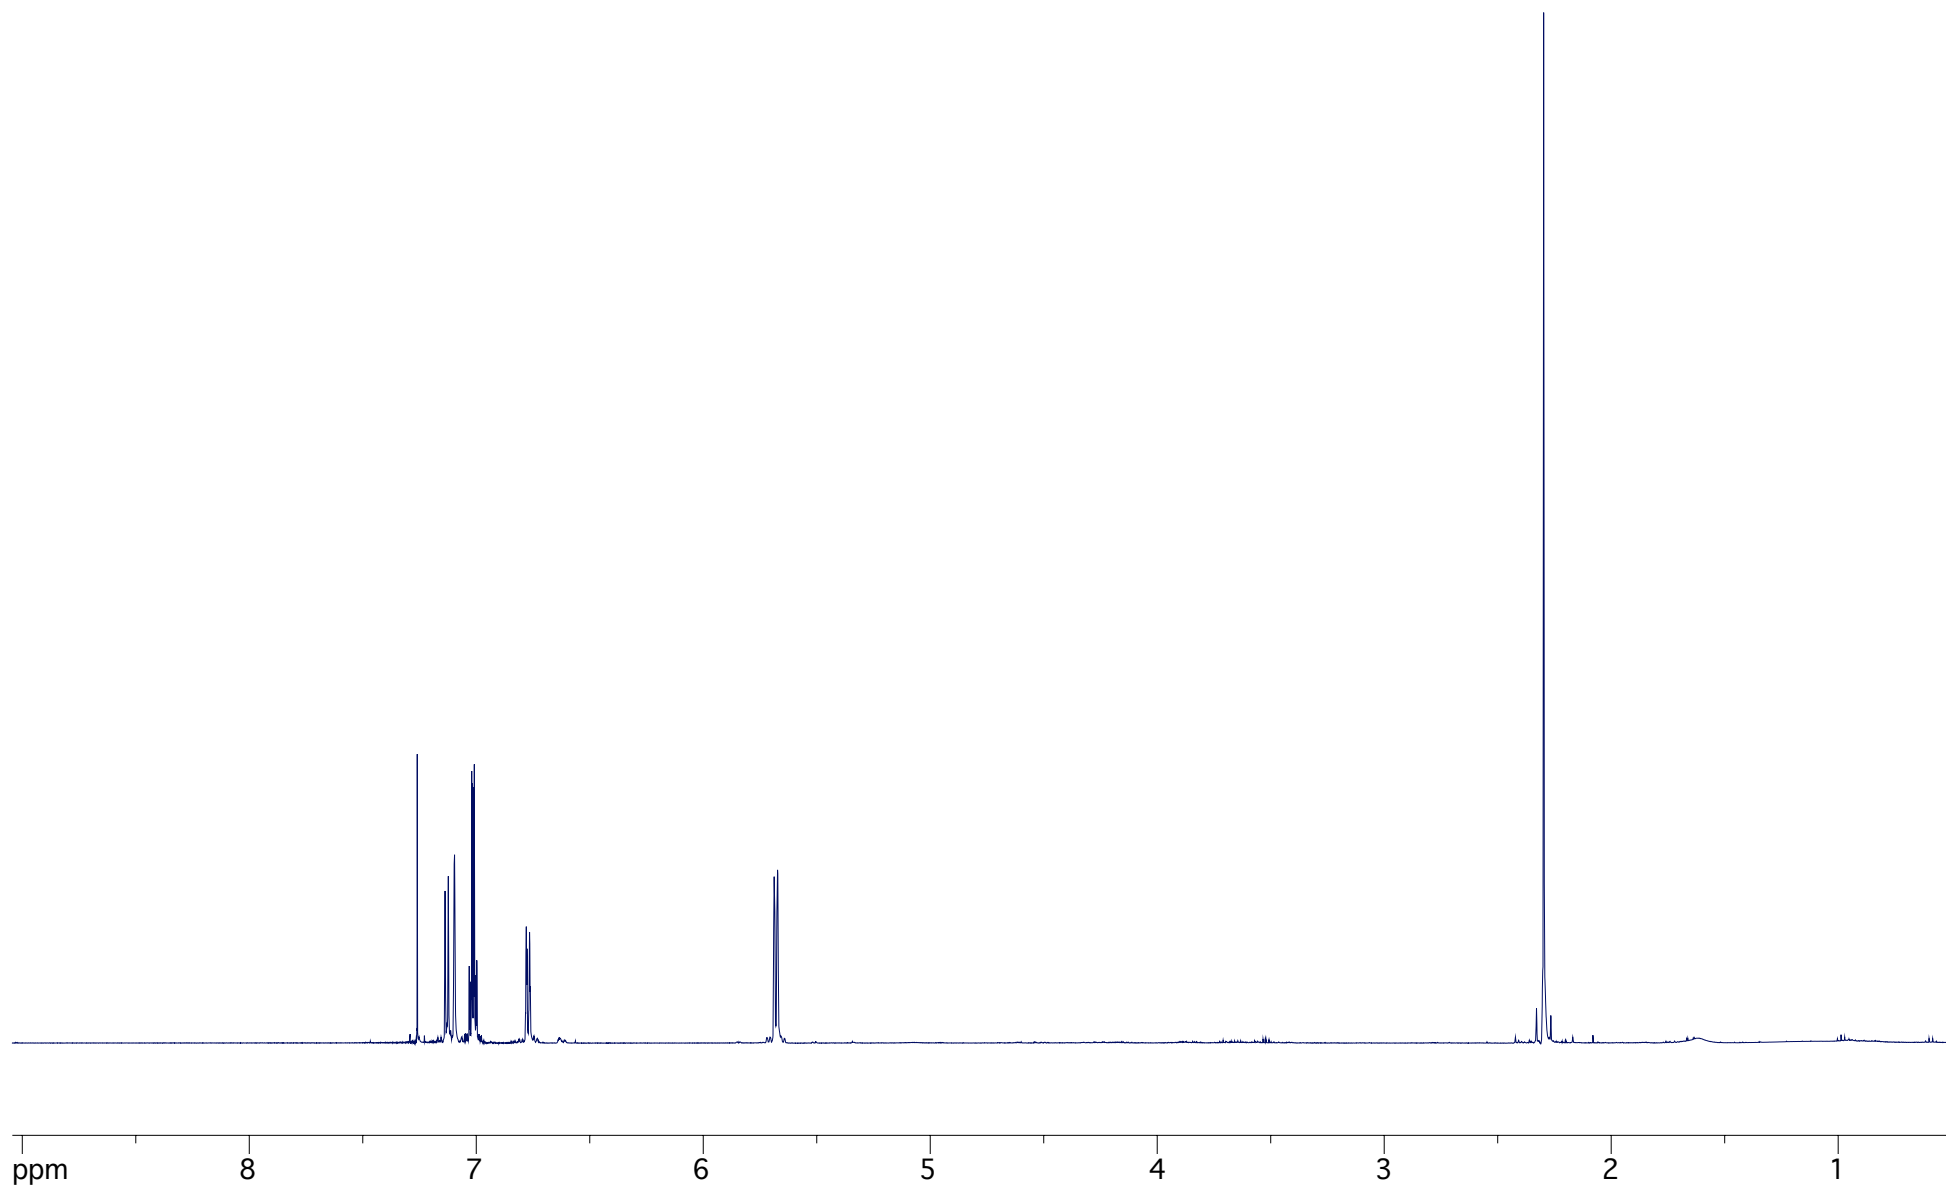

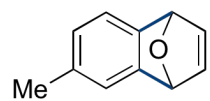**13g**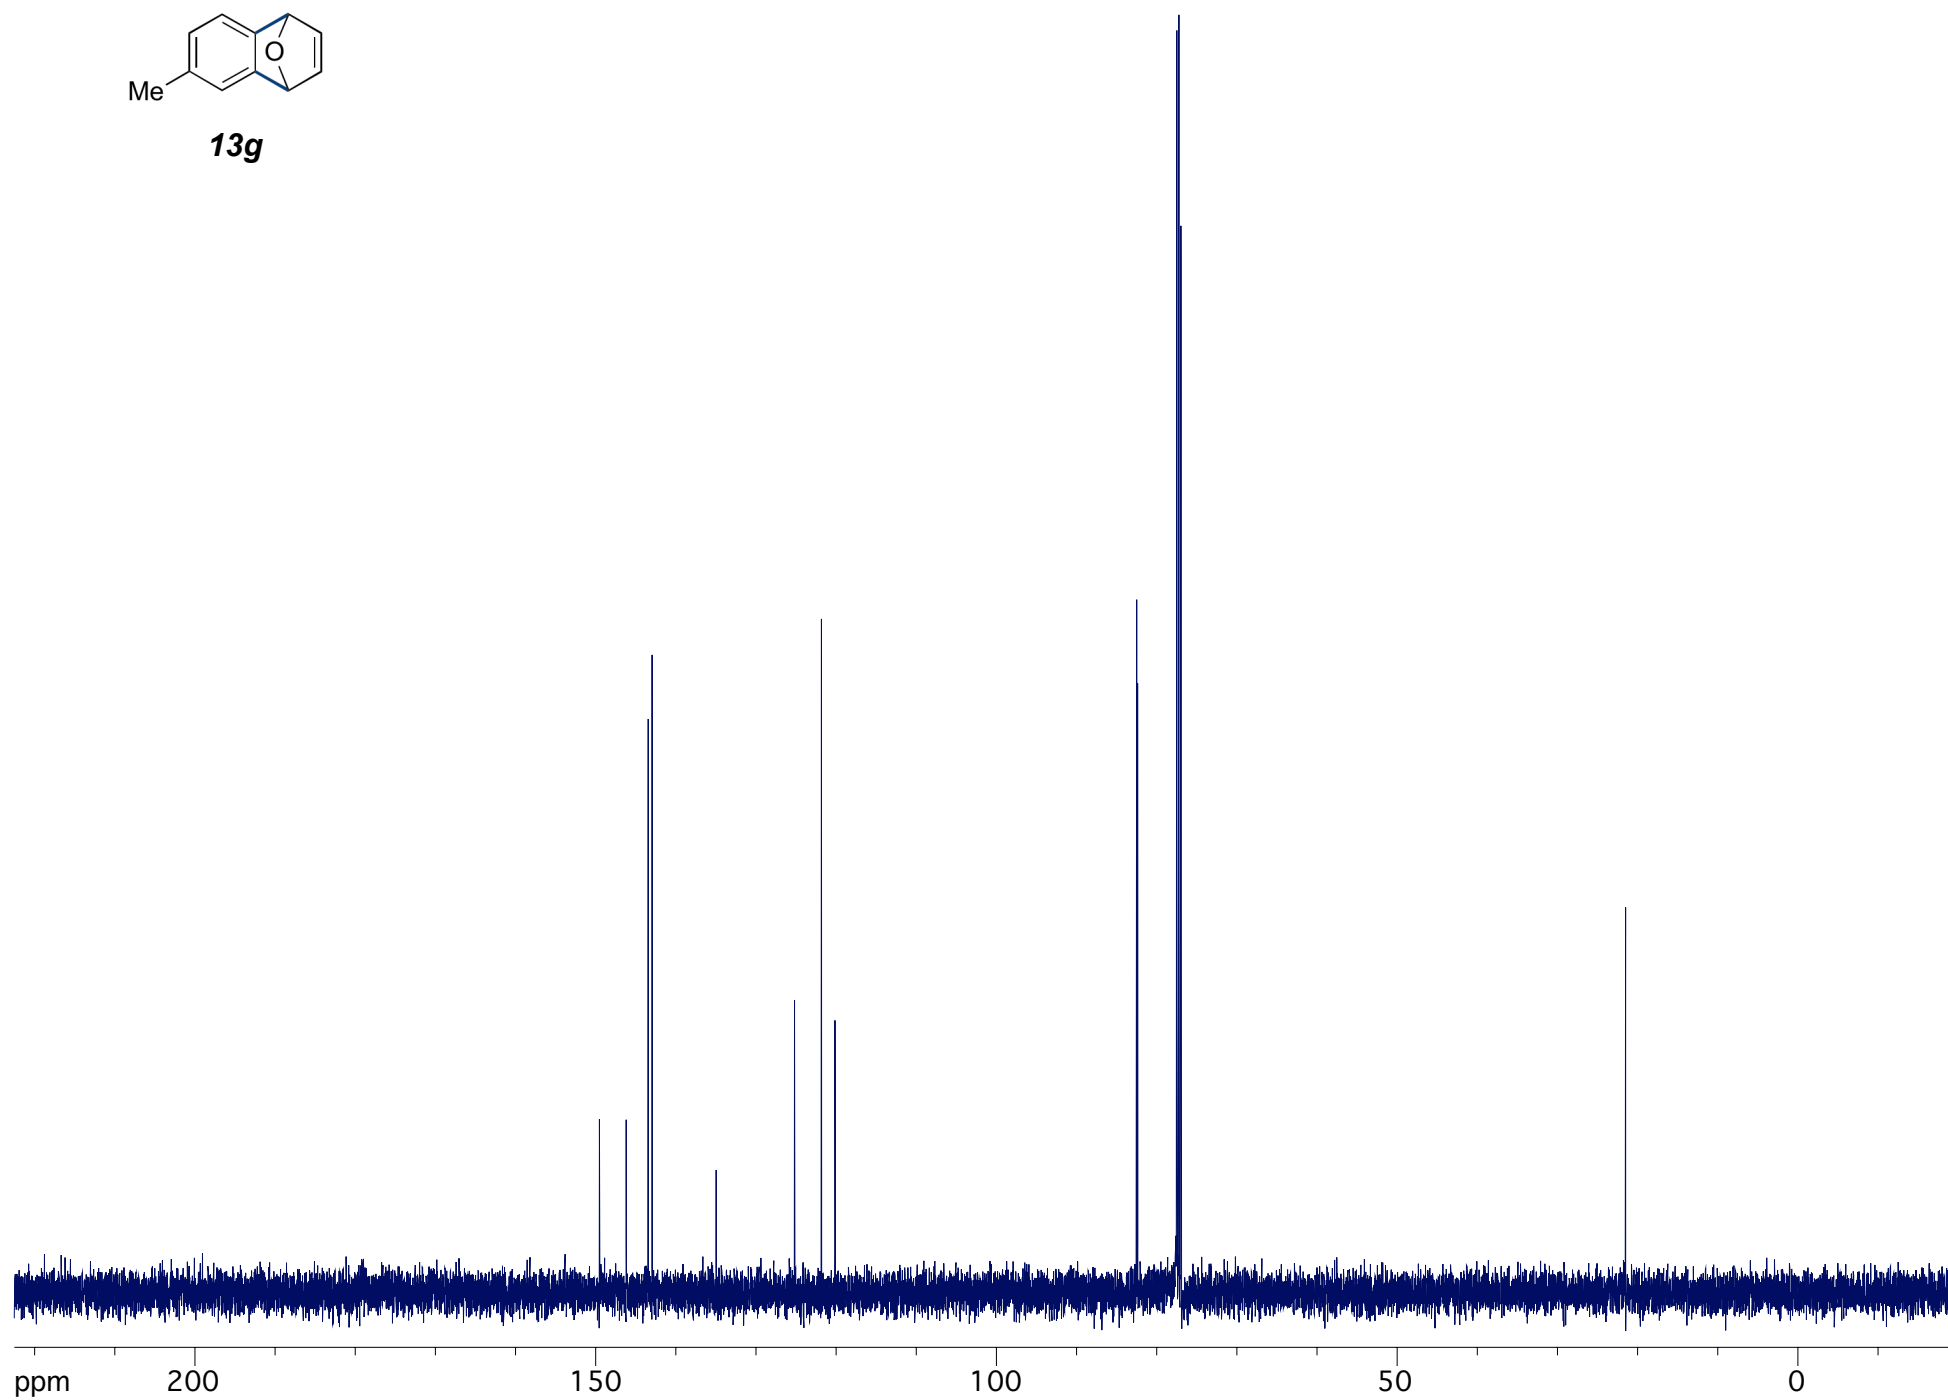

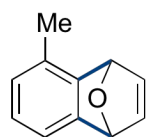**13h**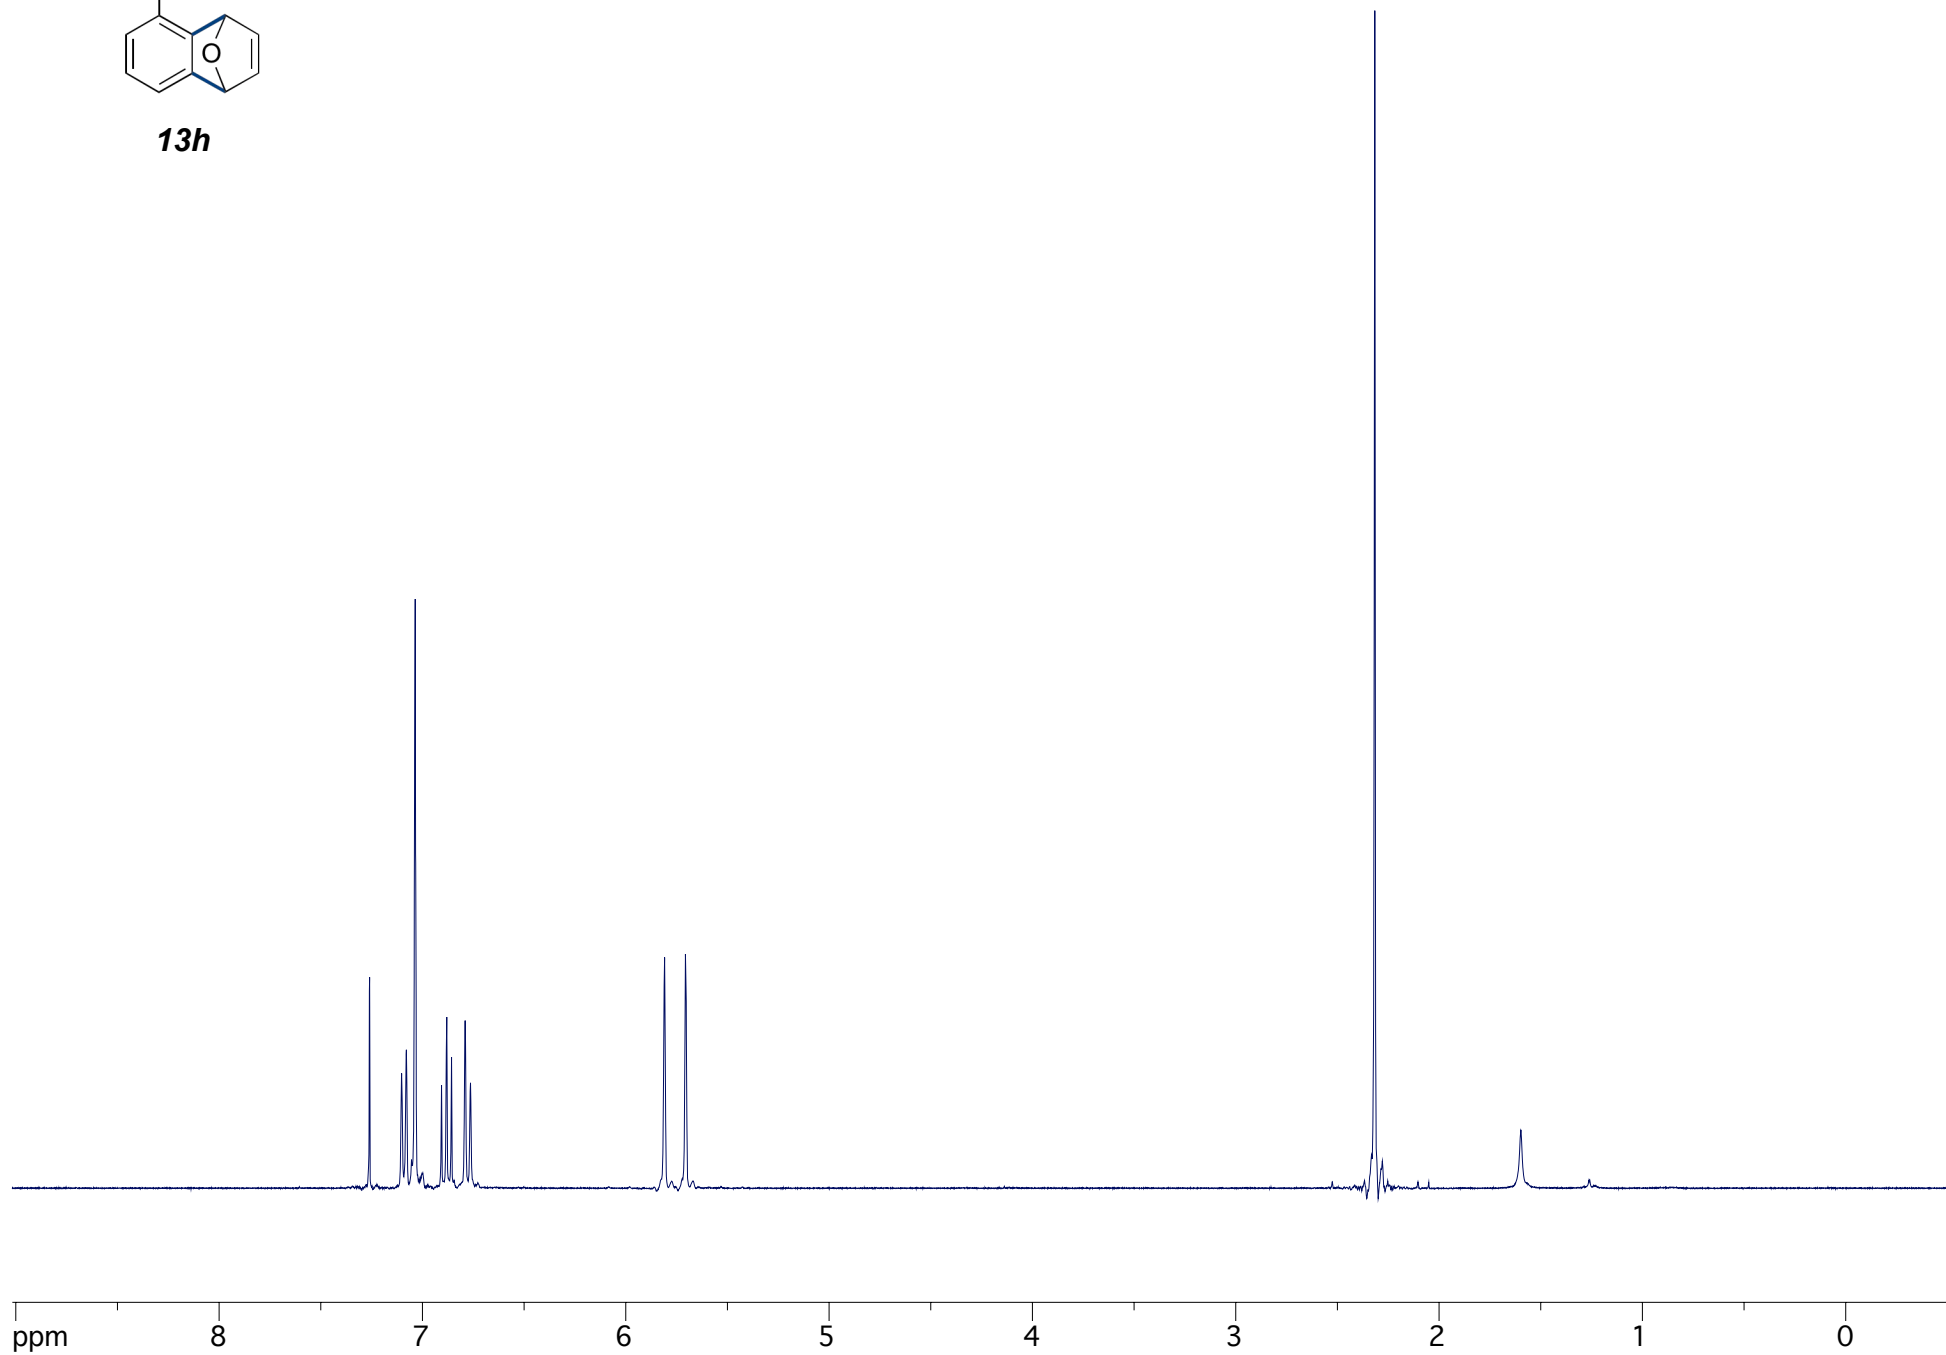



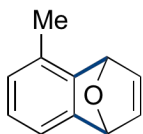**13h**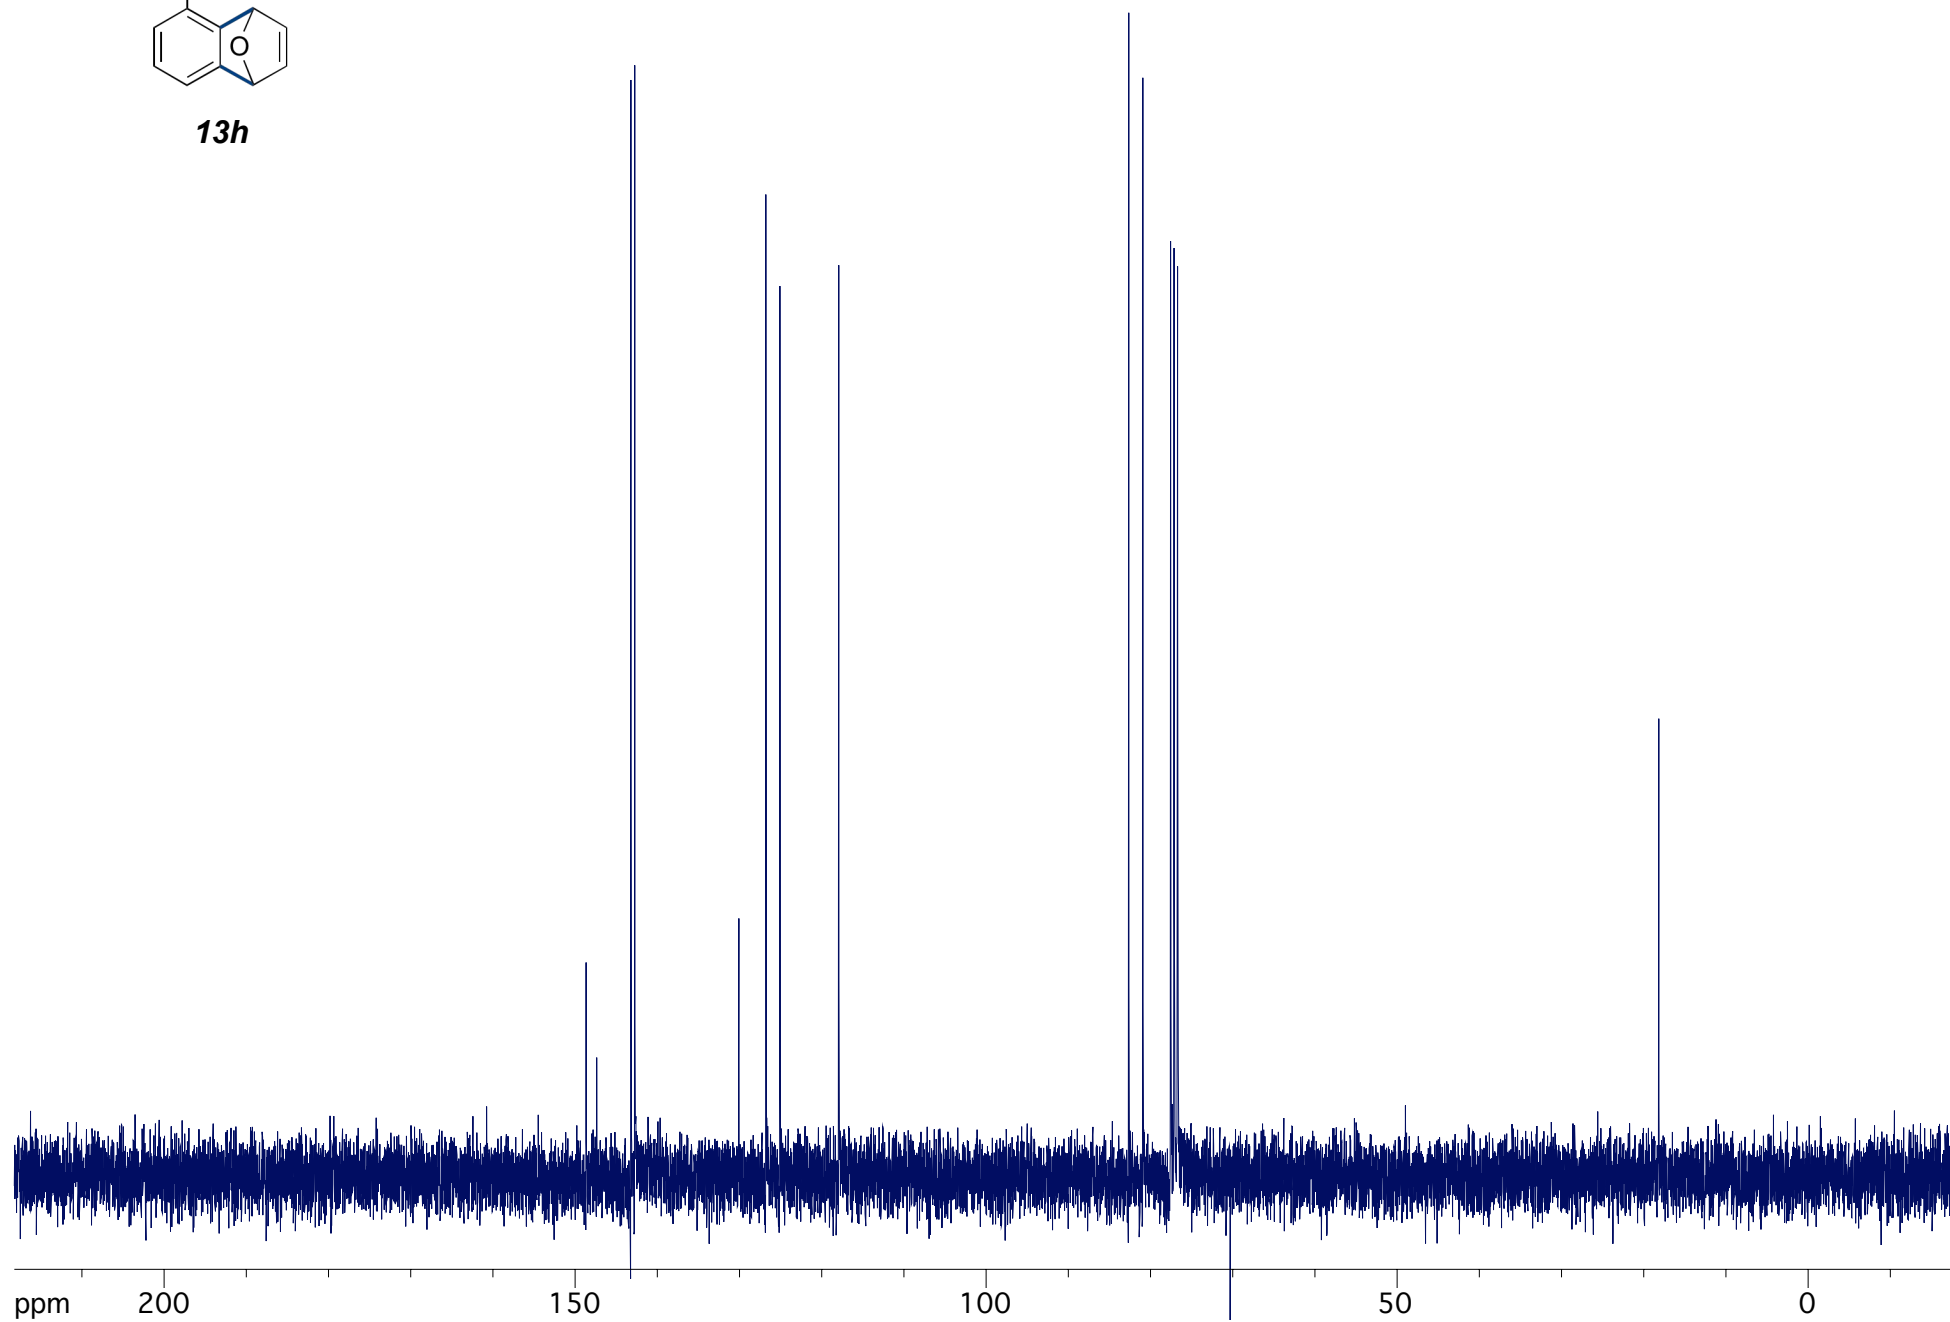

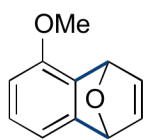**13i**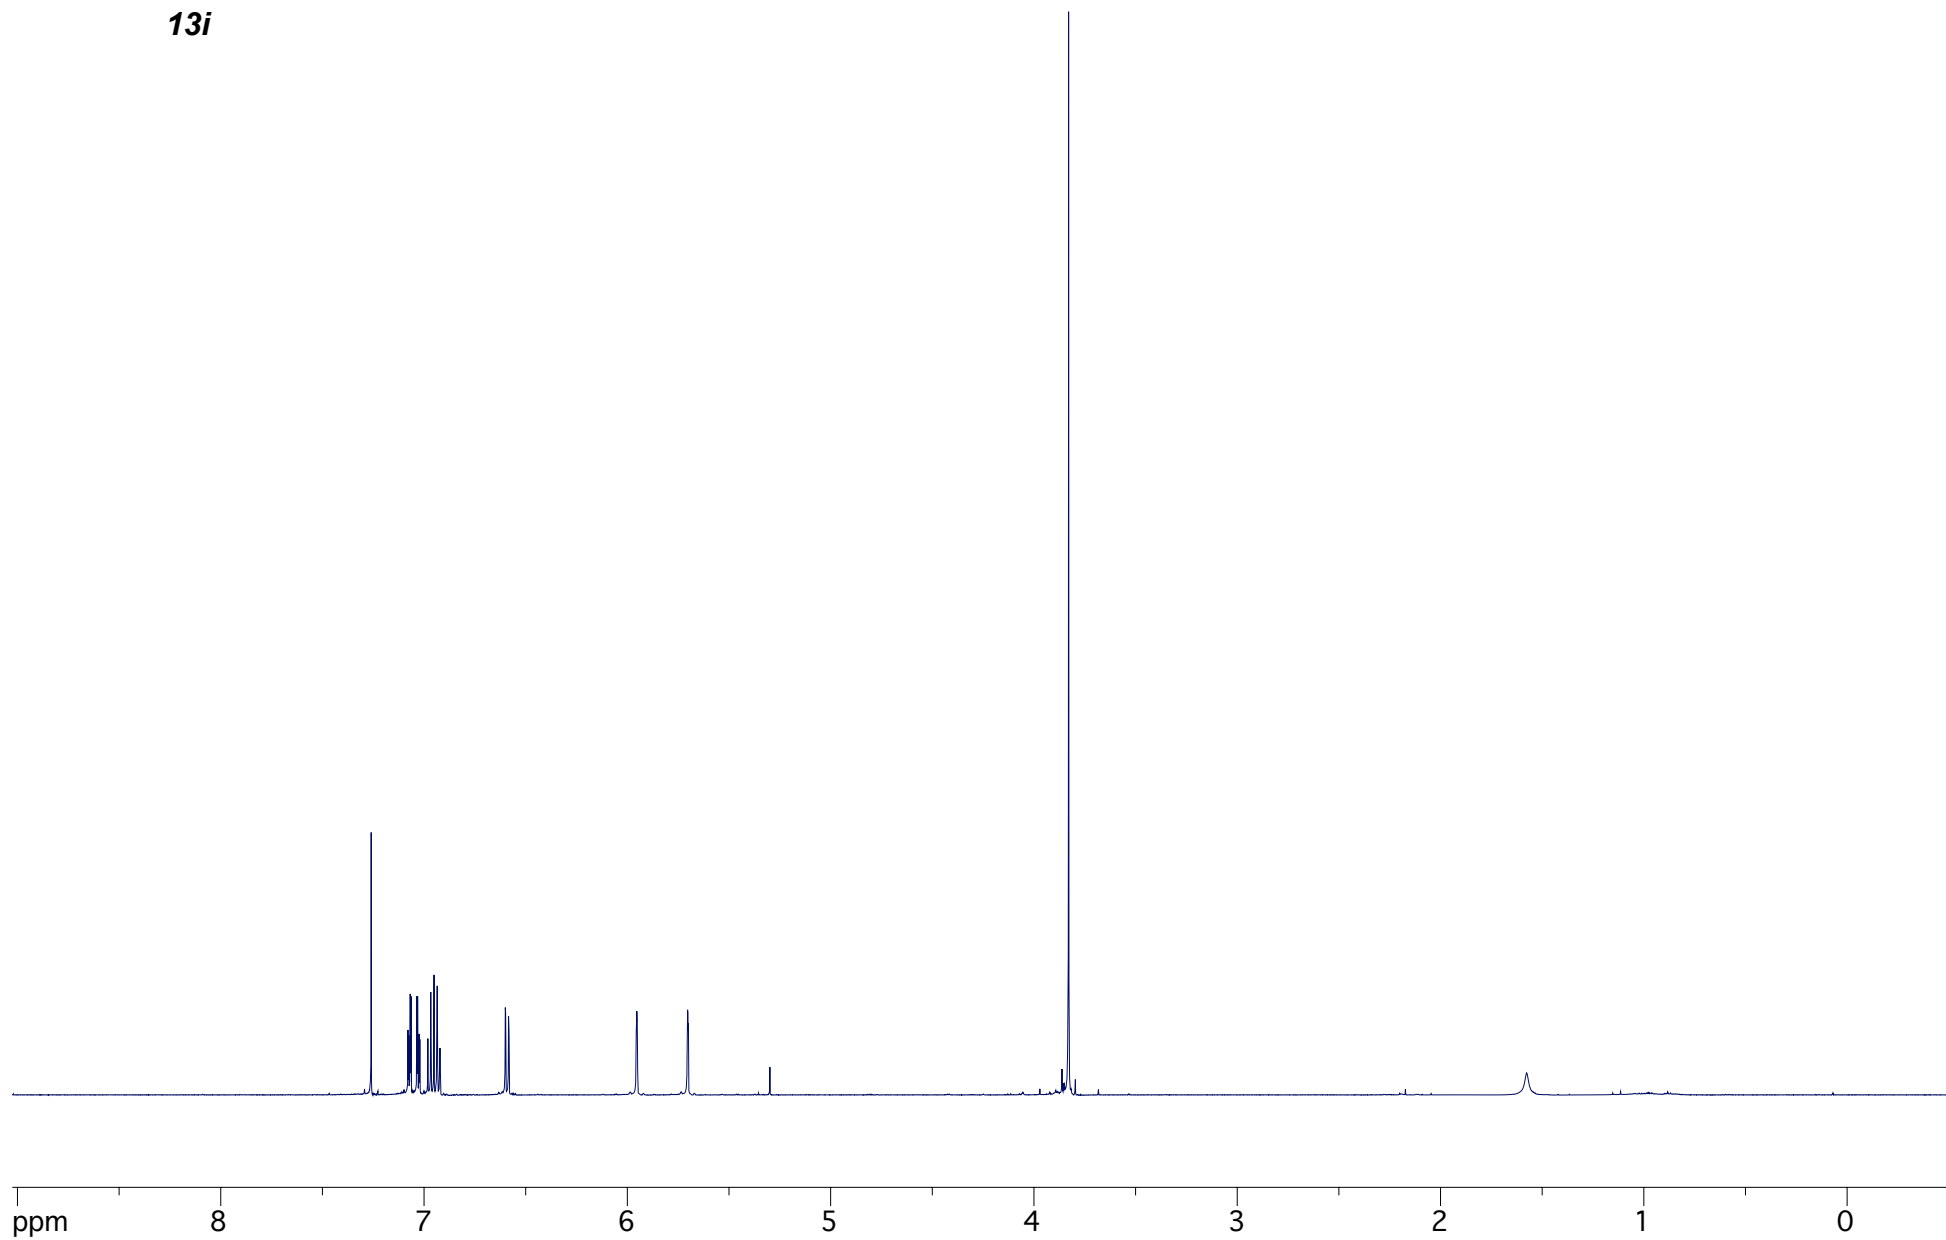

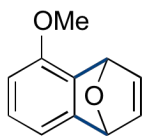**13i**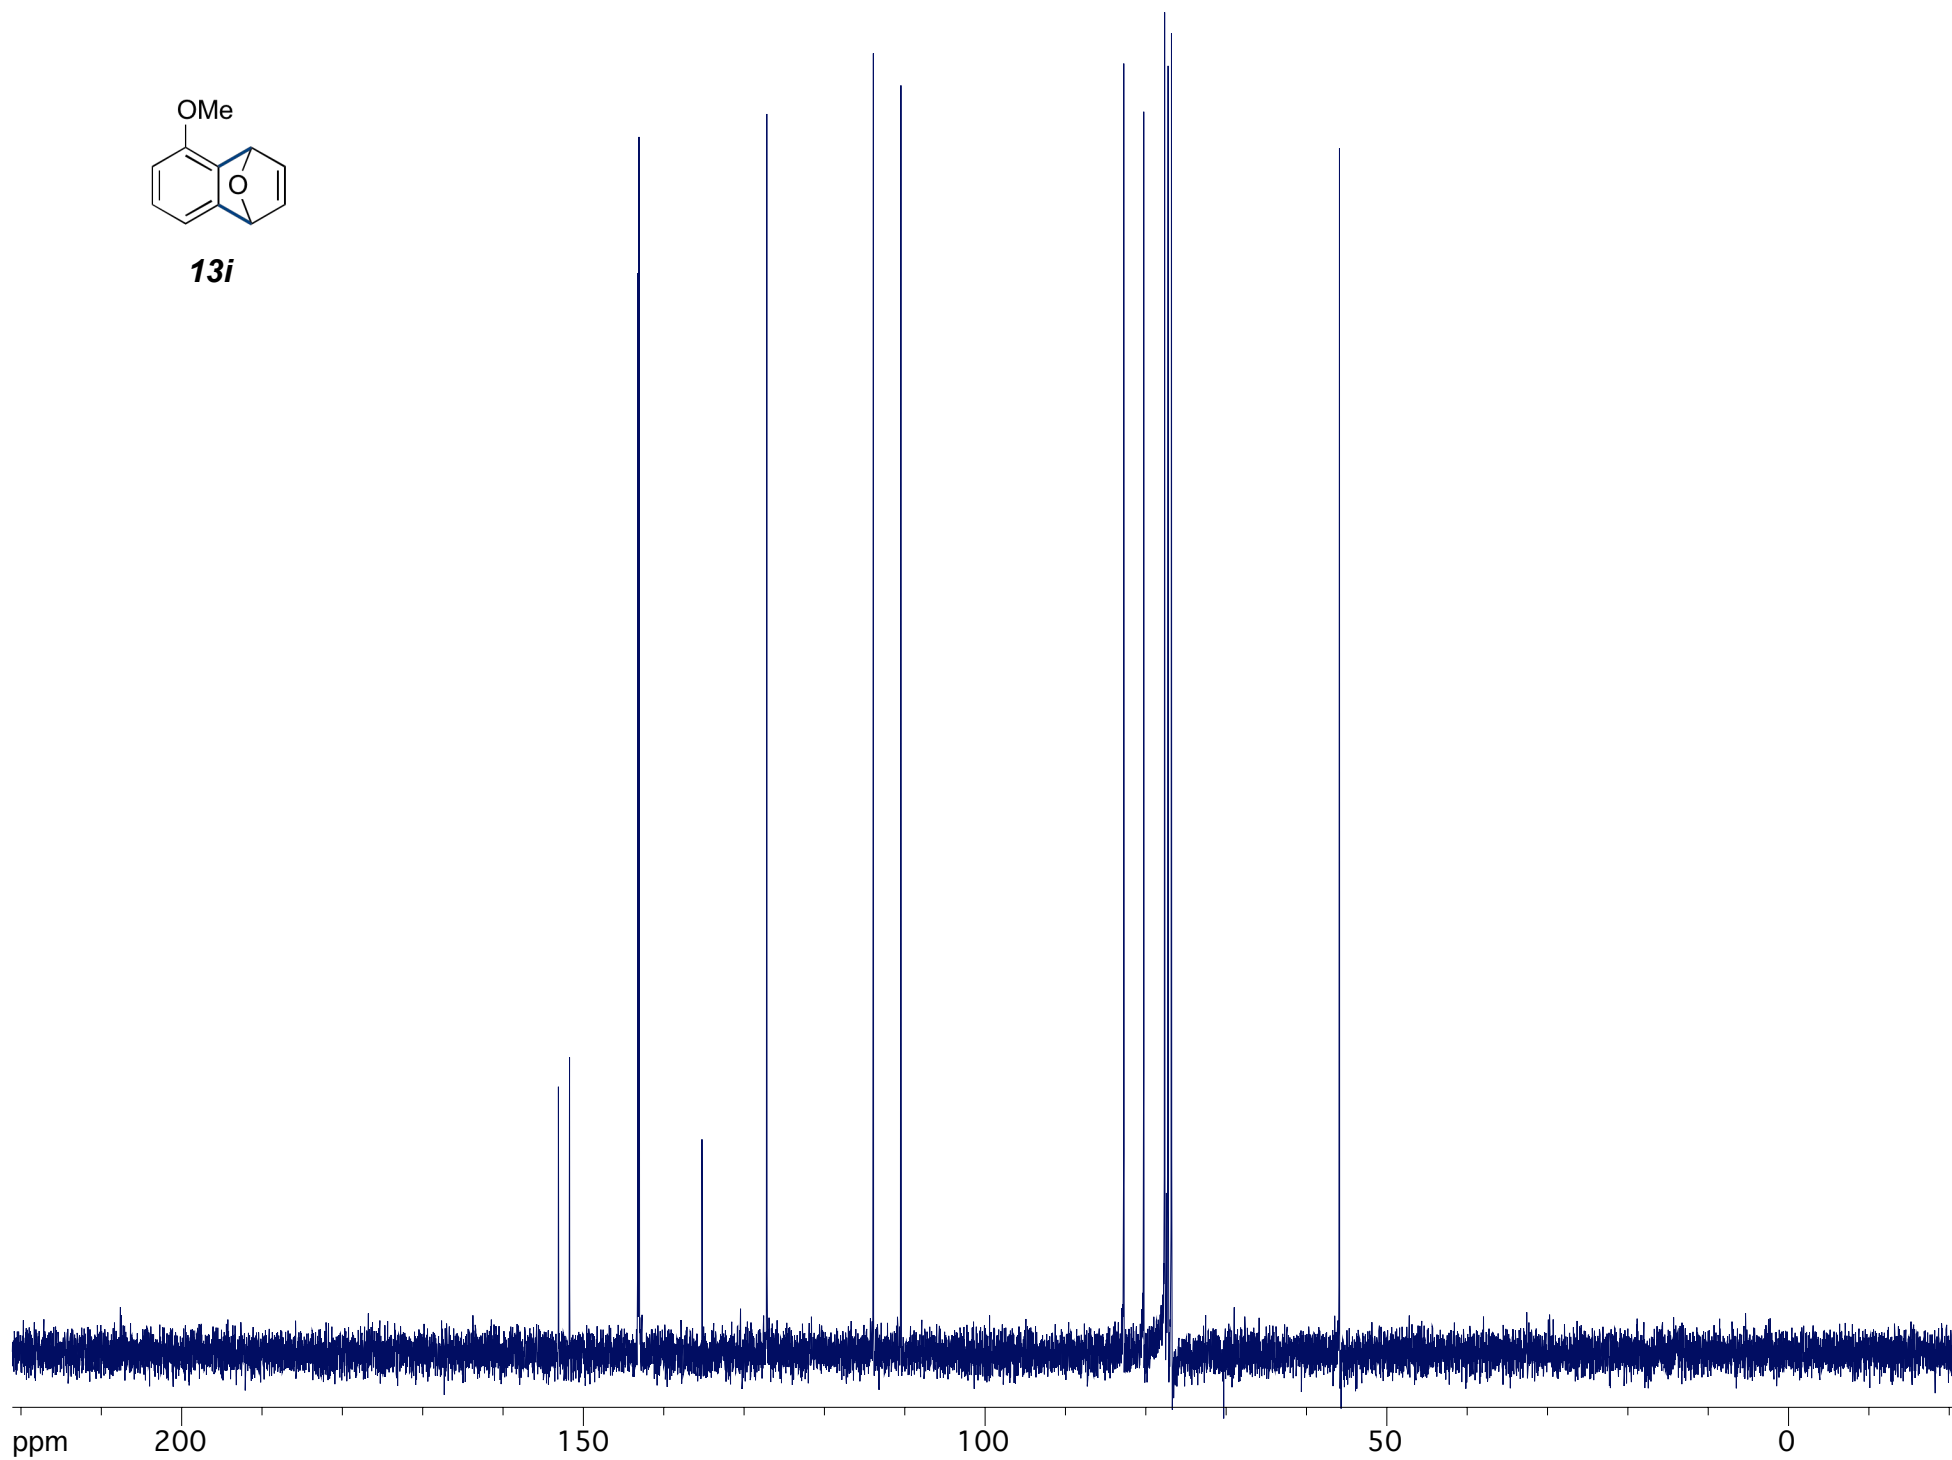

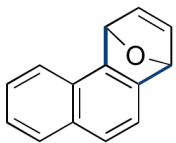

**13j**

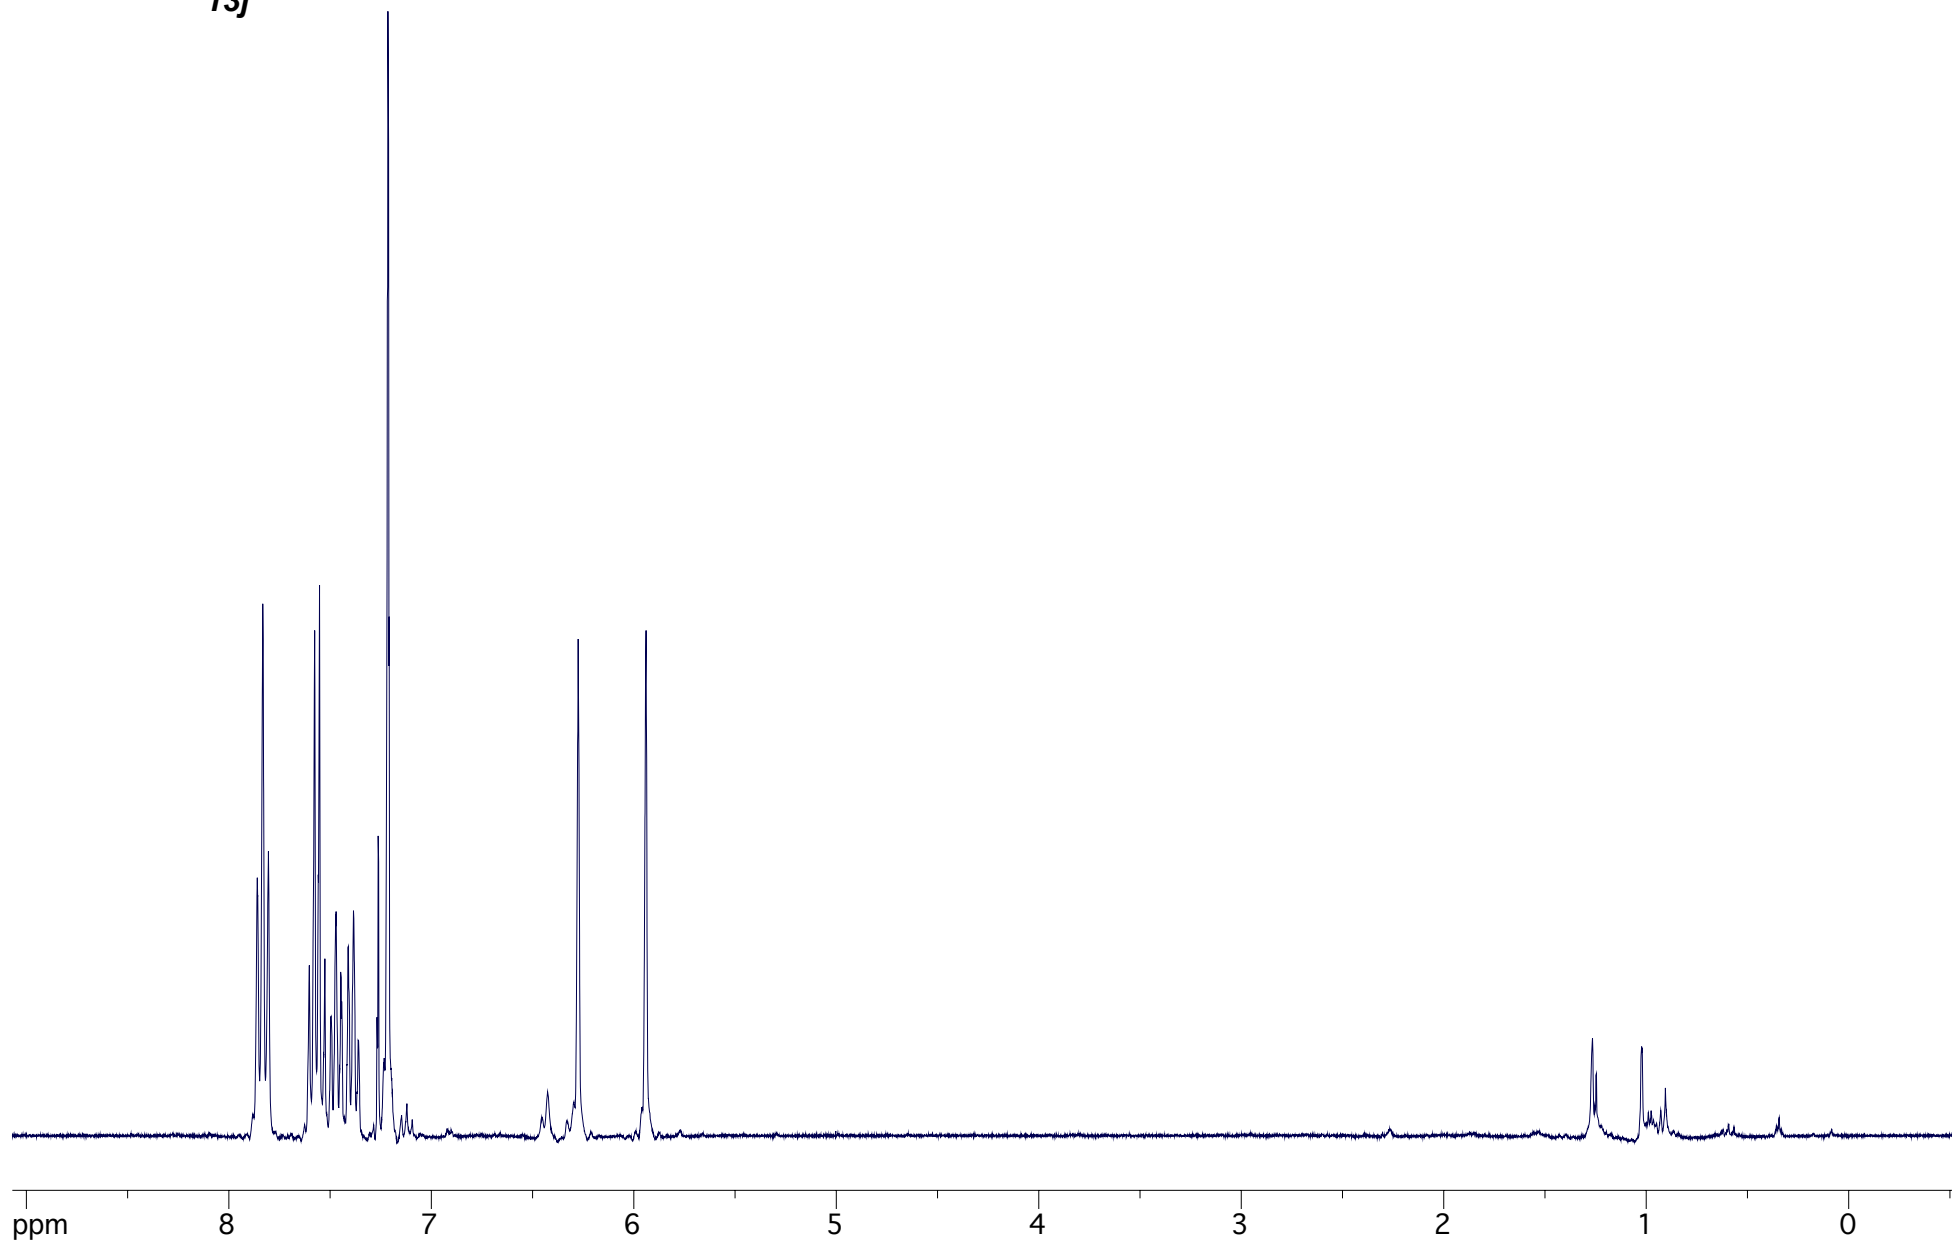

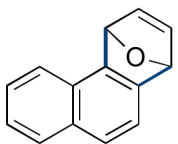**13j**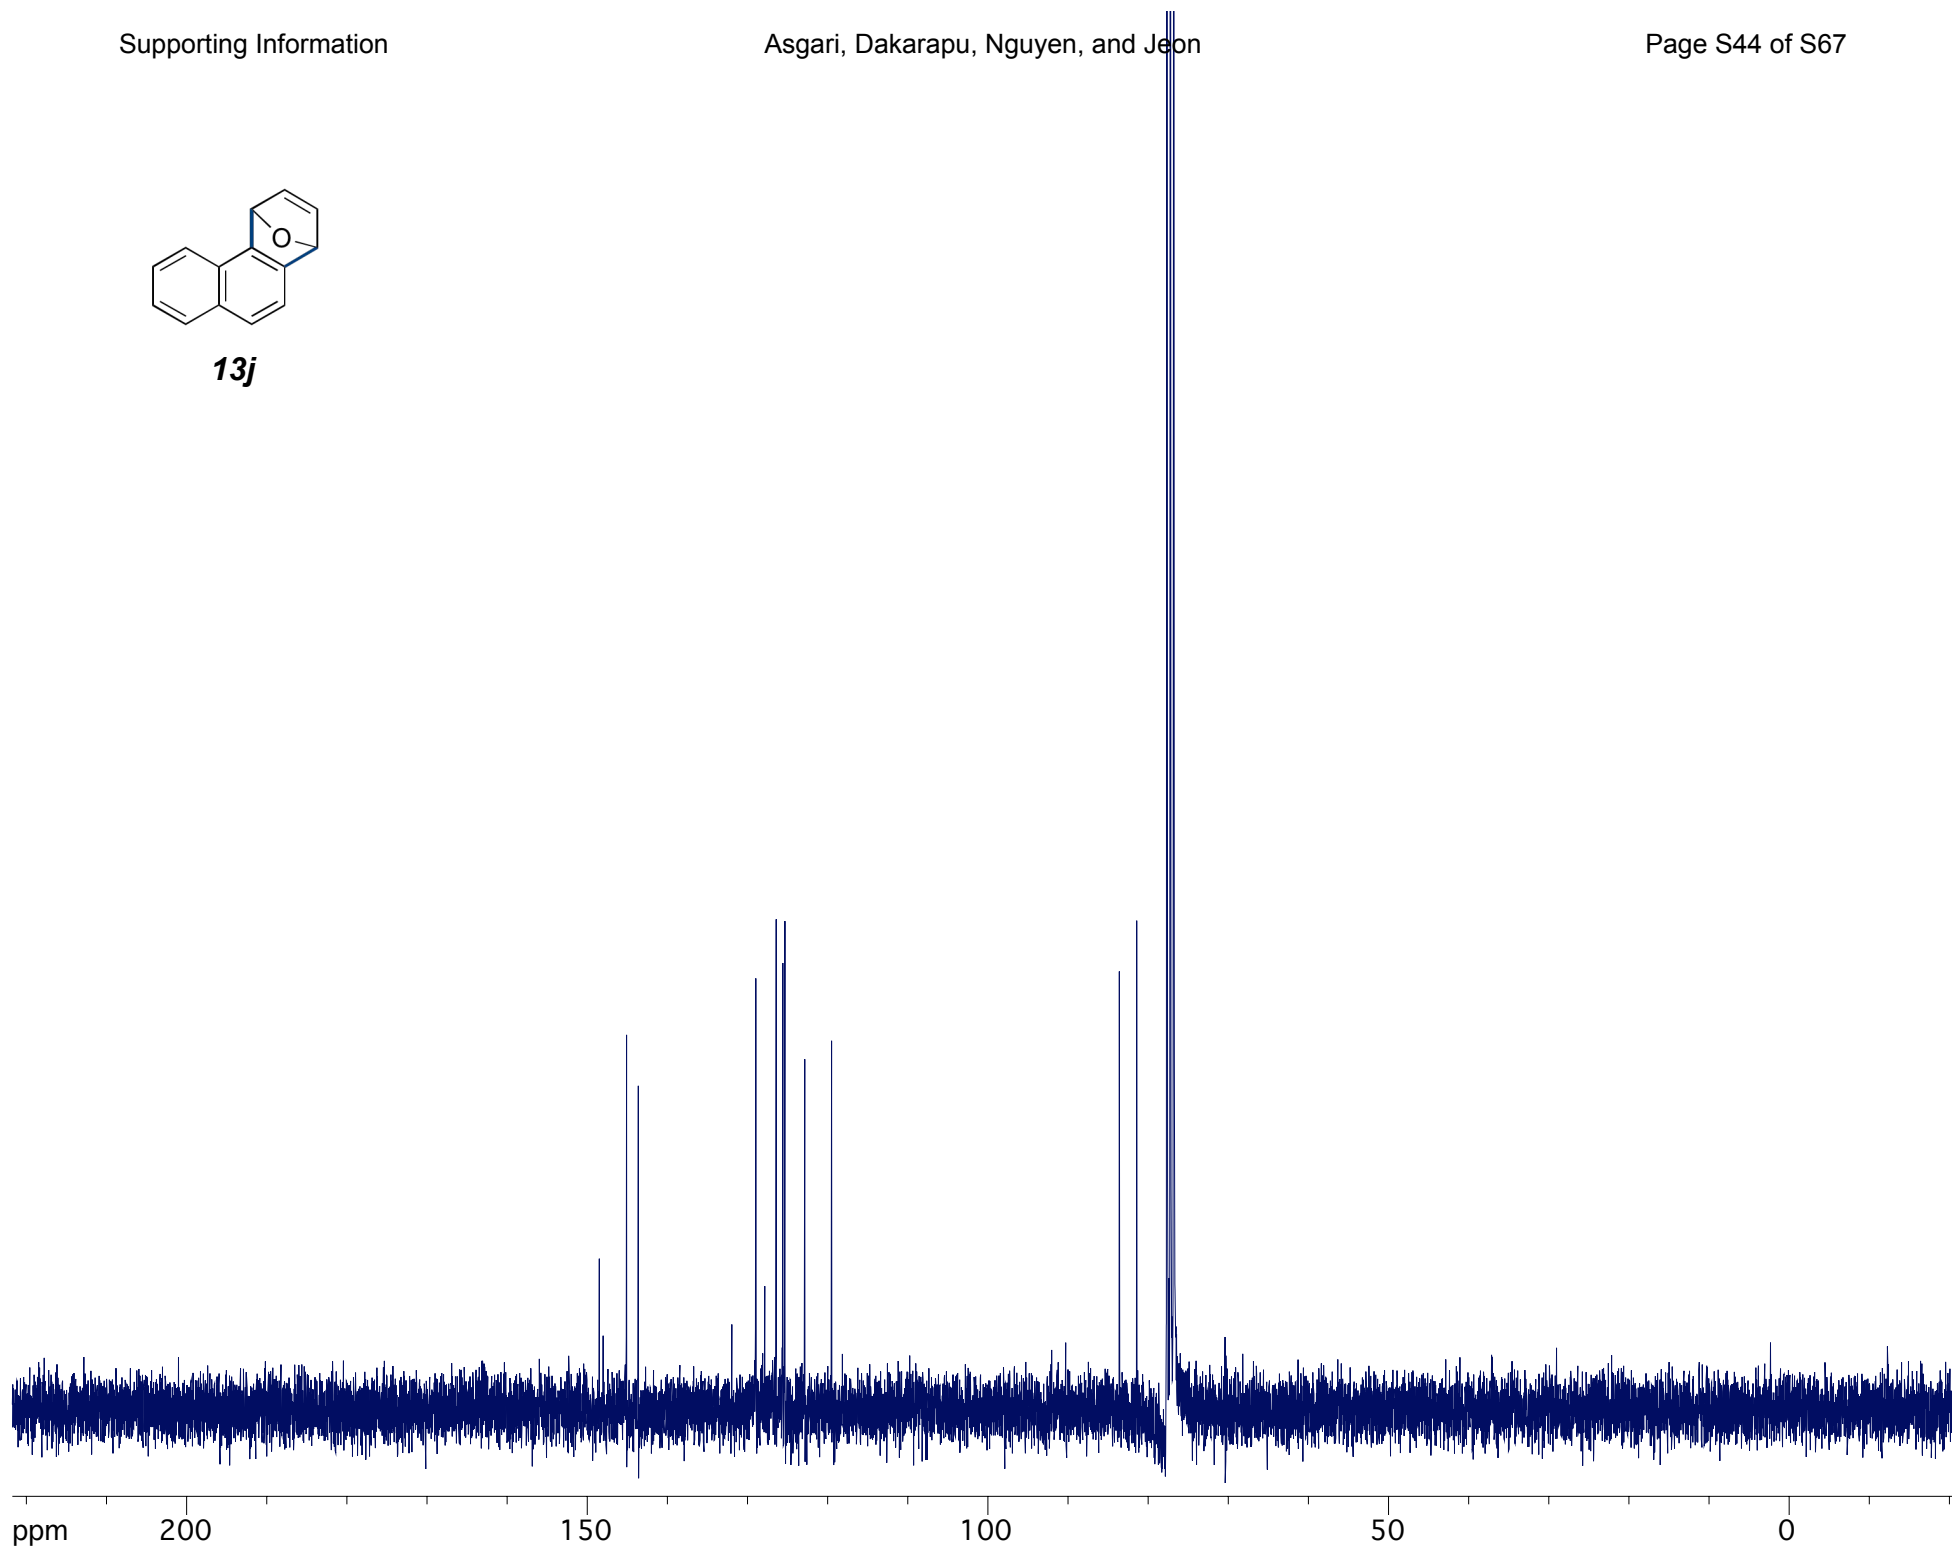

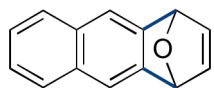**13k**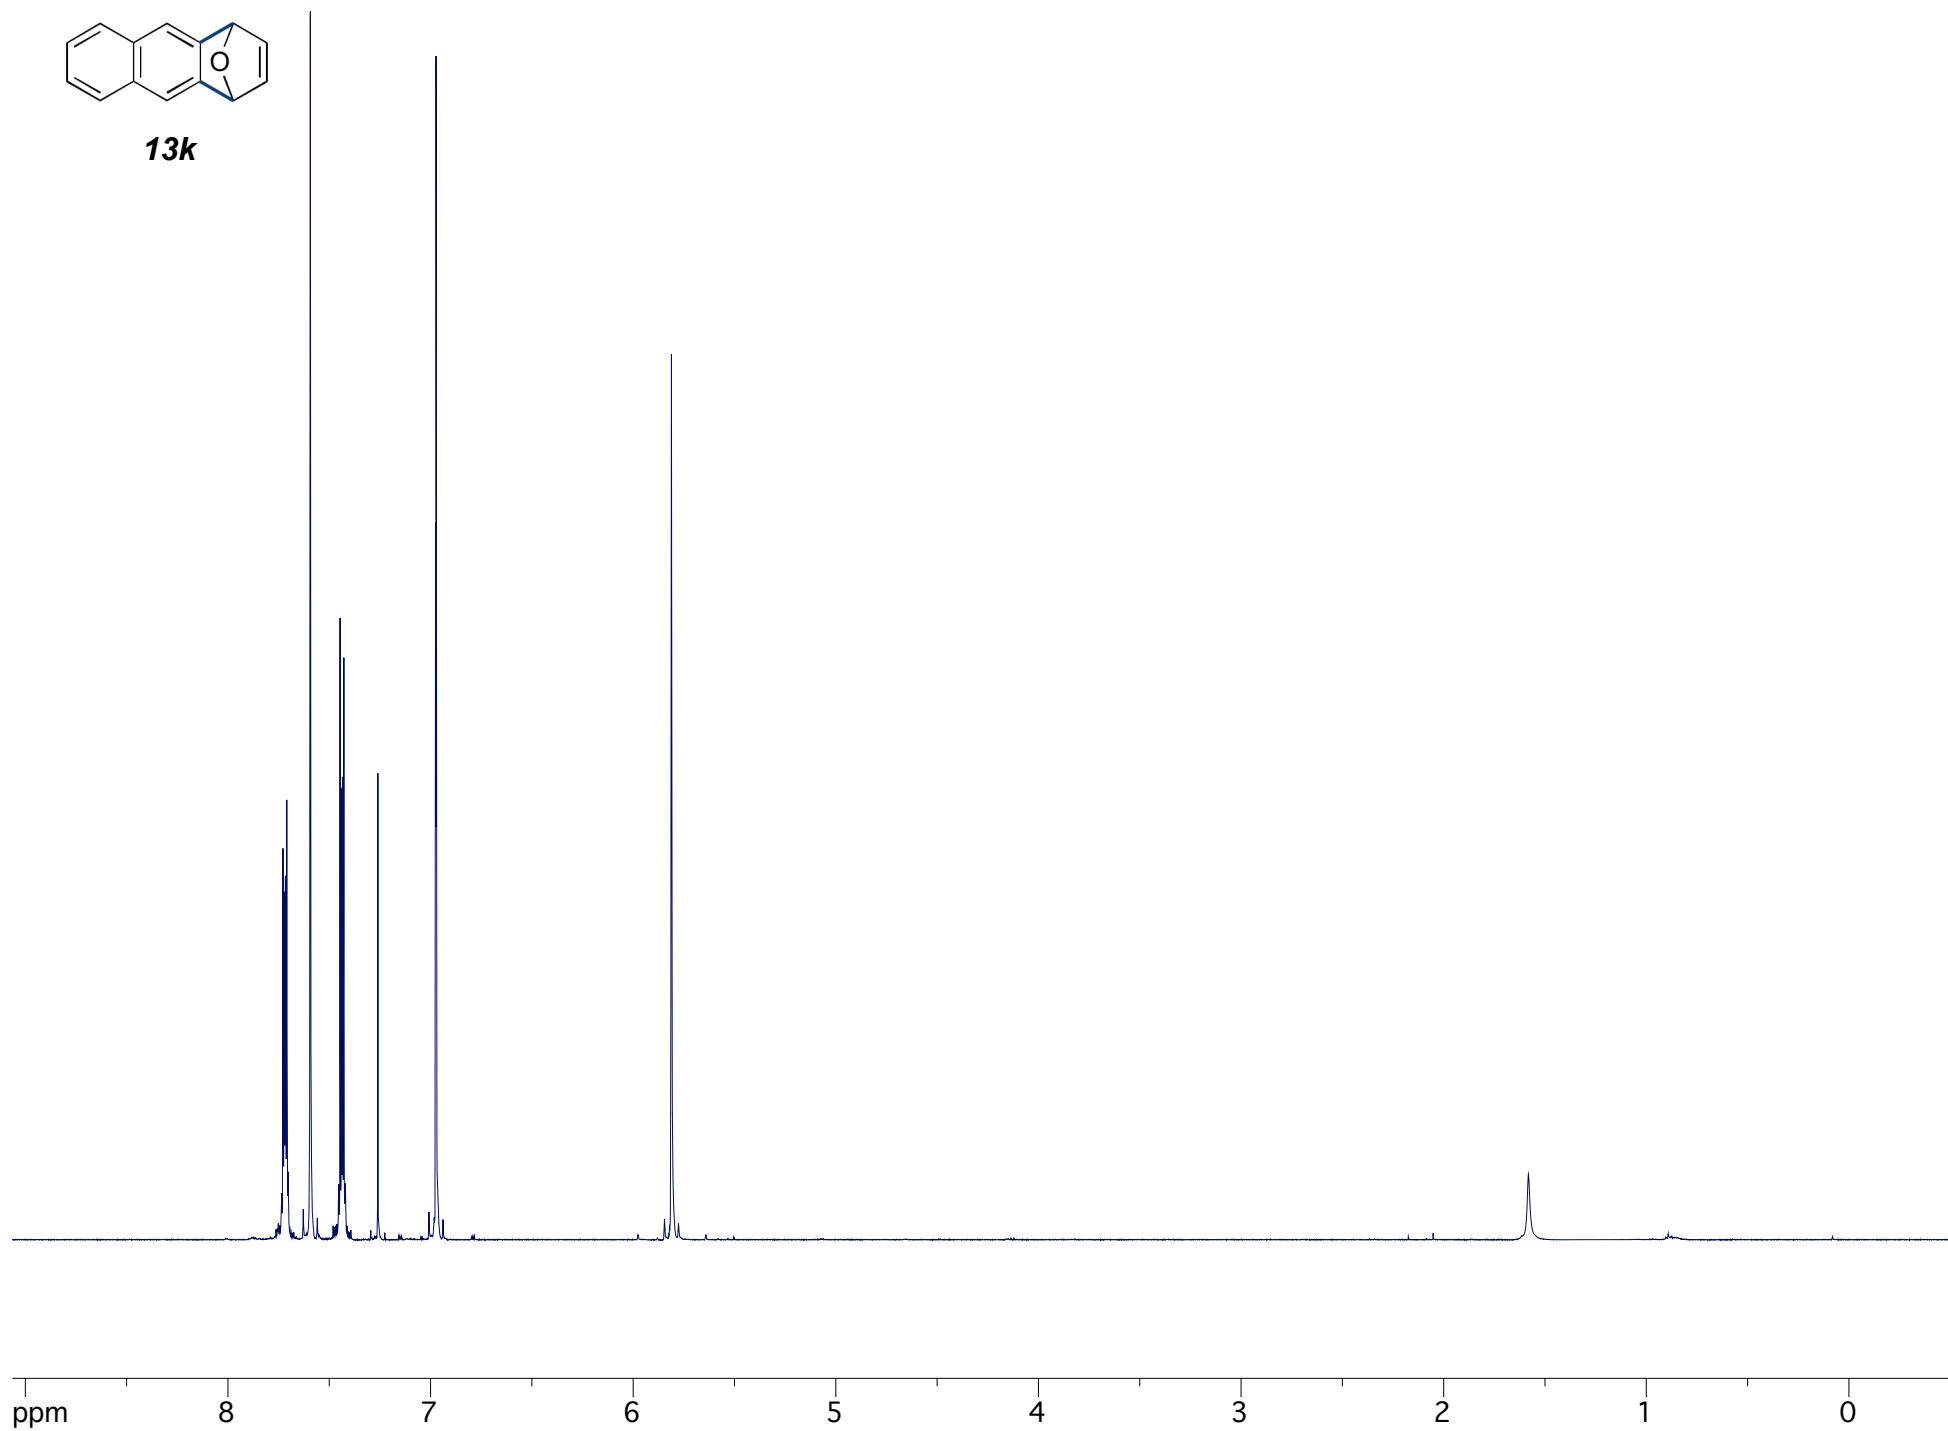

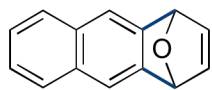**13k**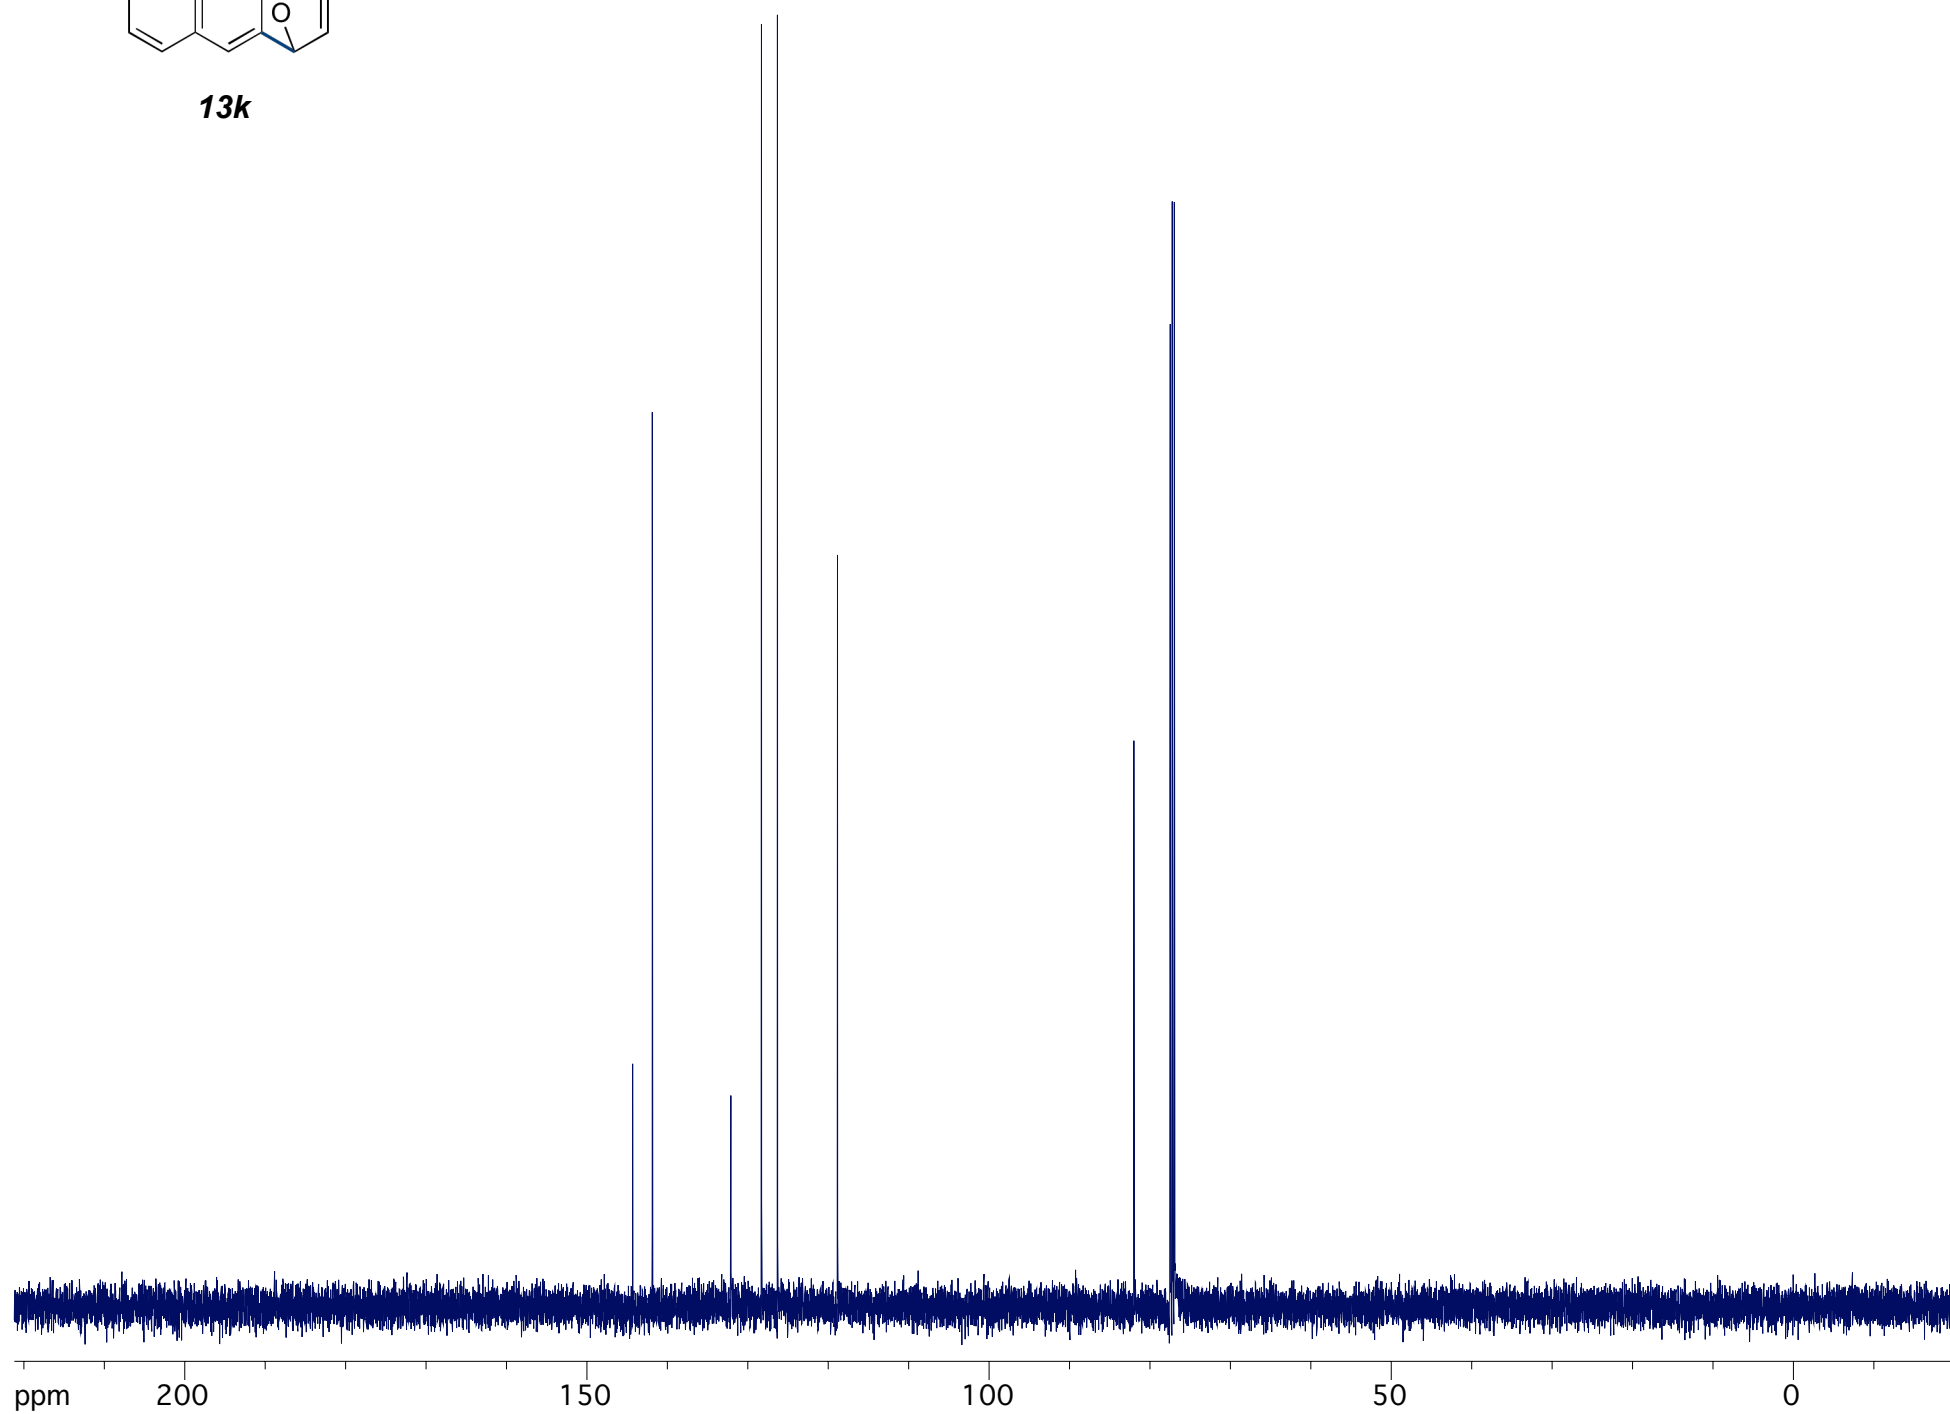

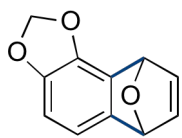**13I**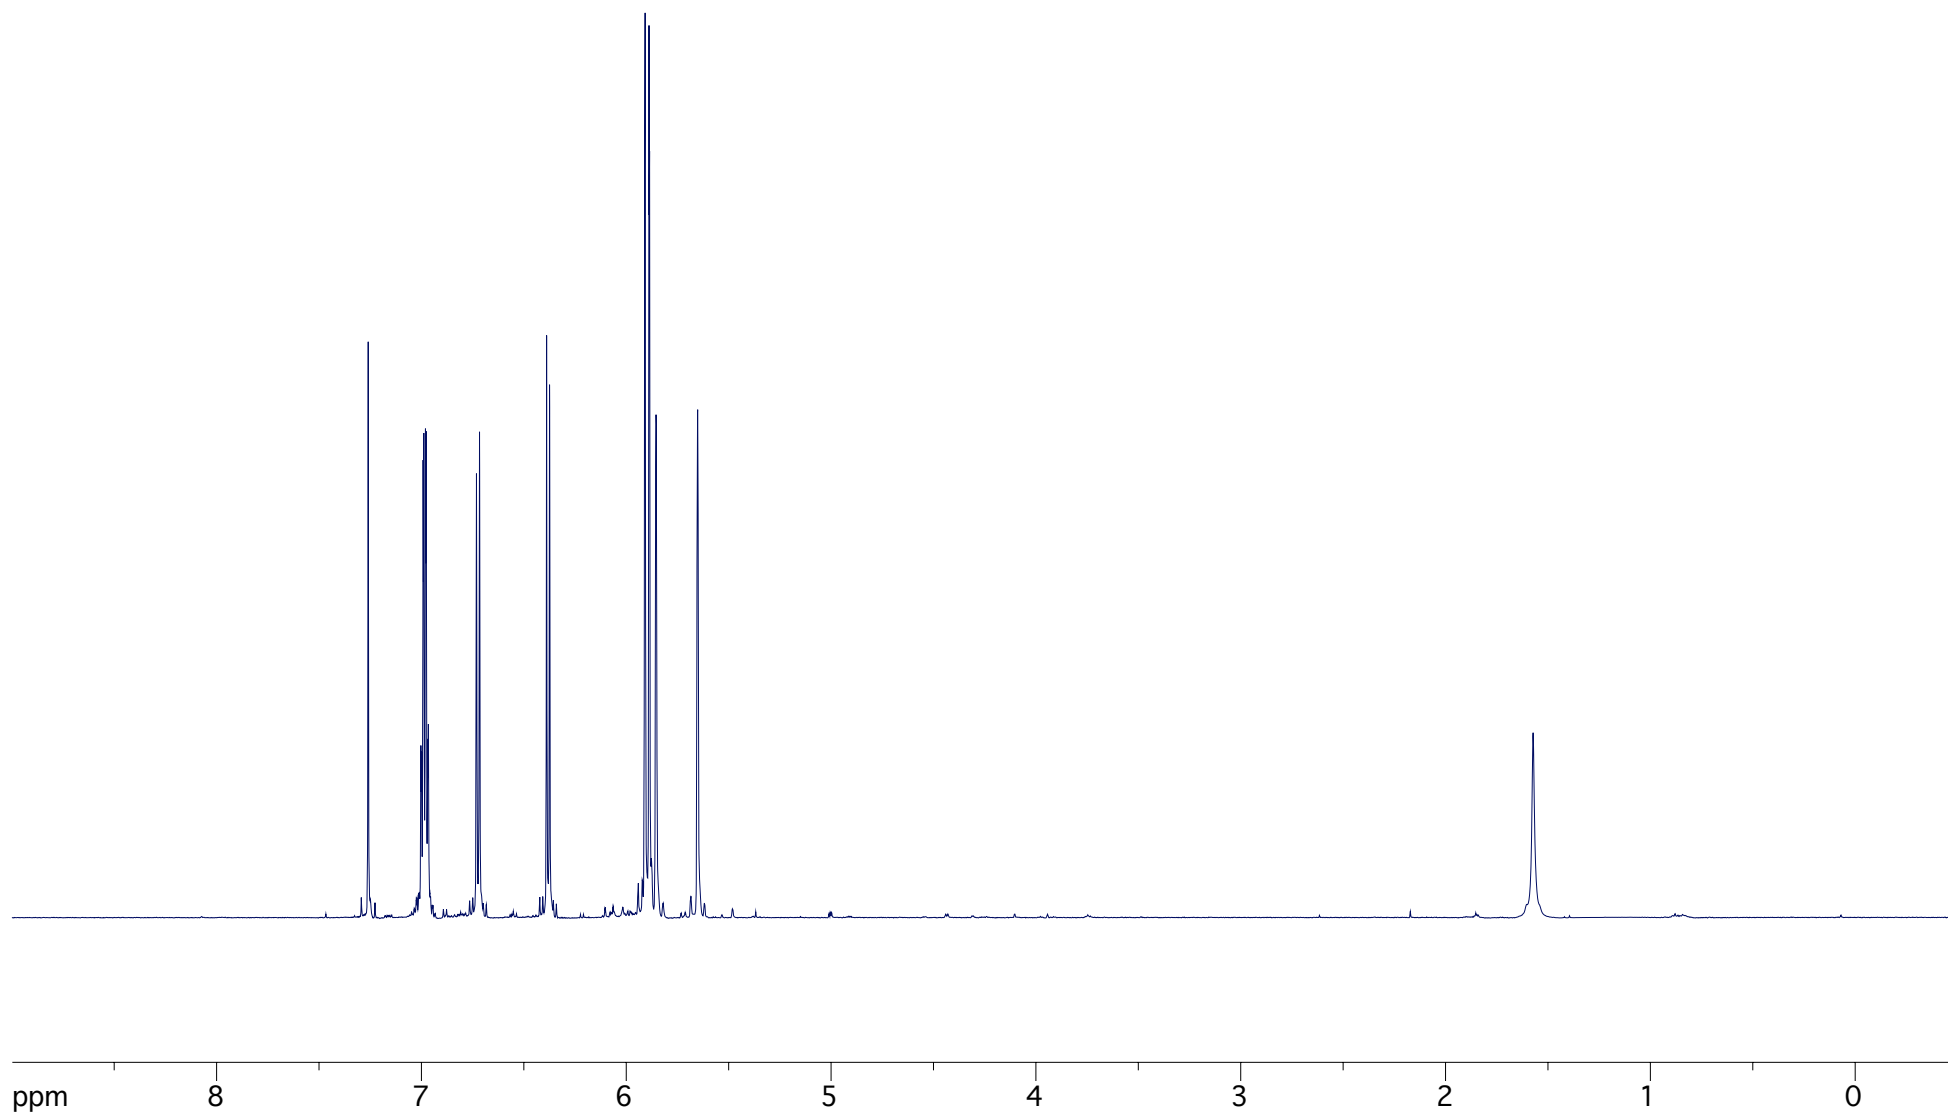



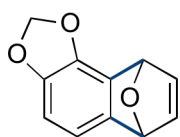**13I**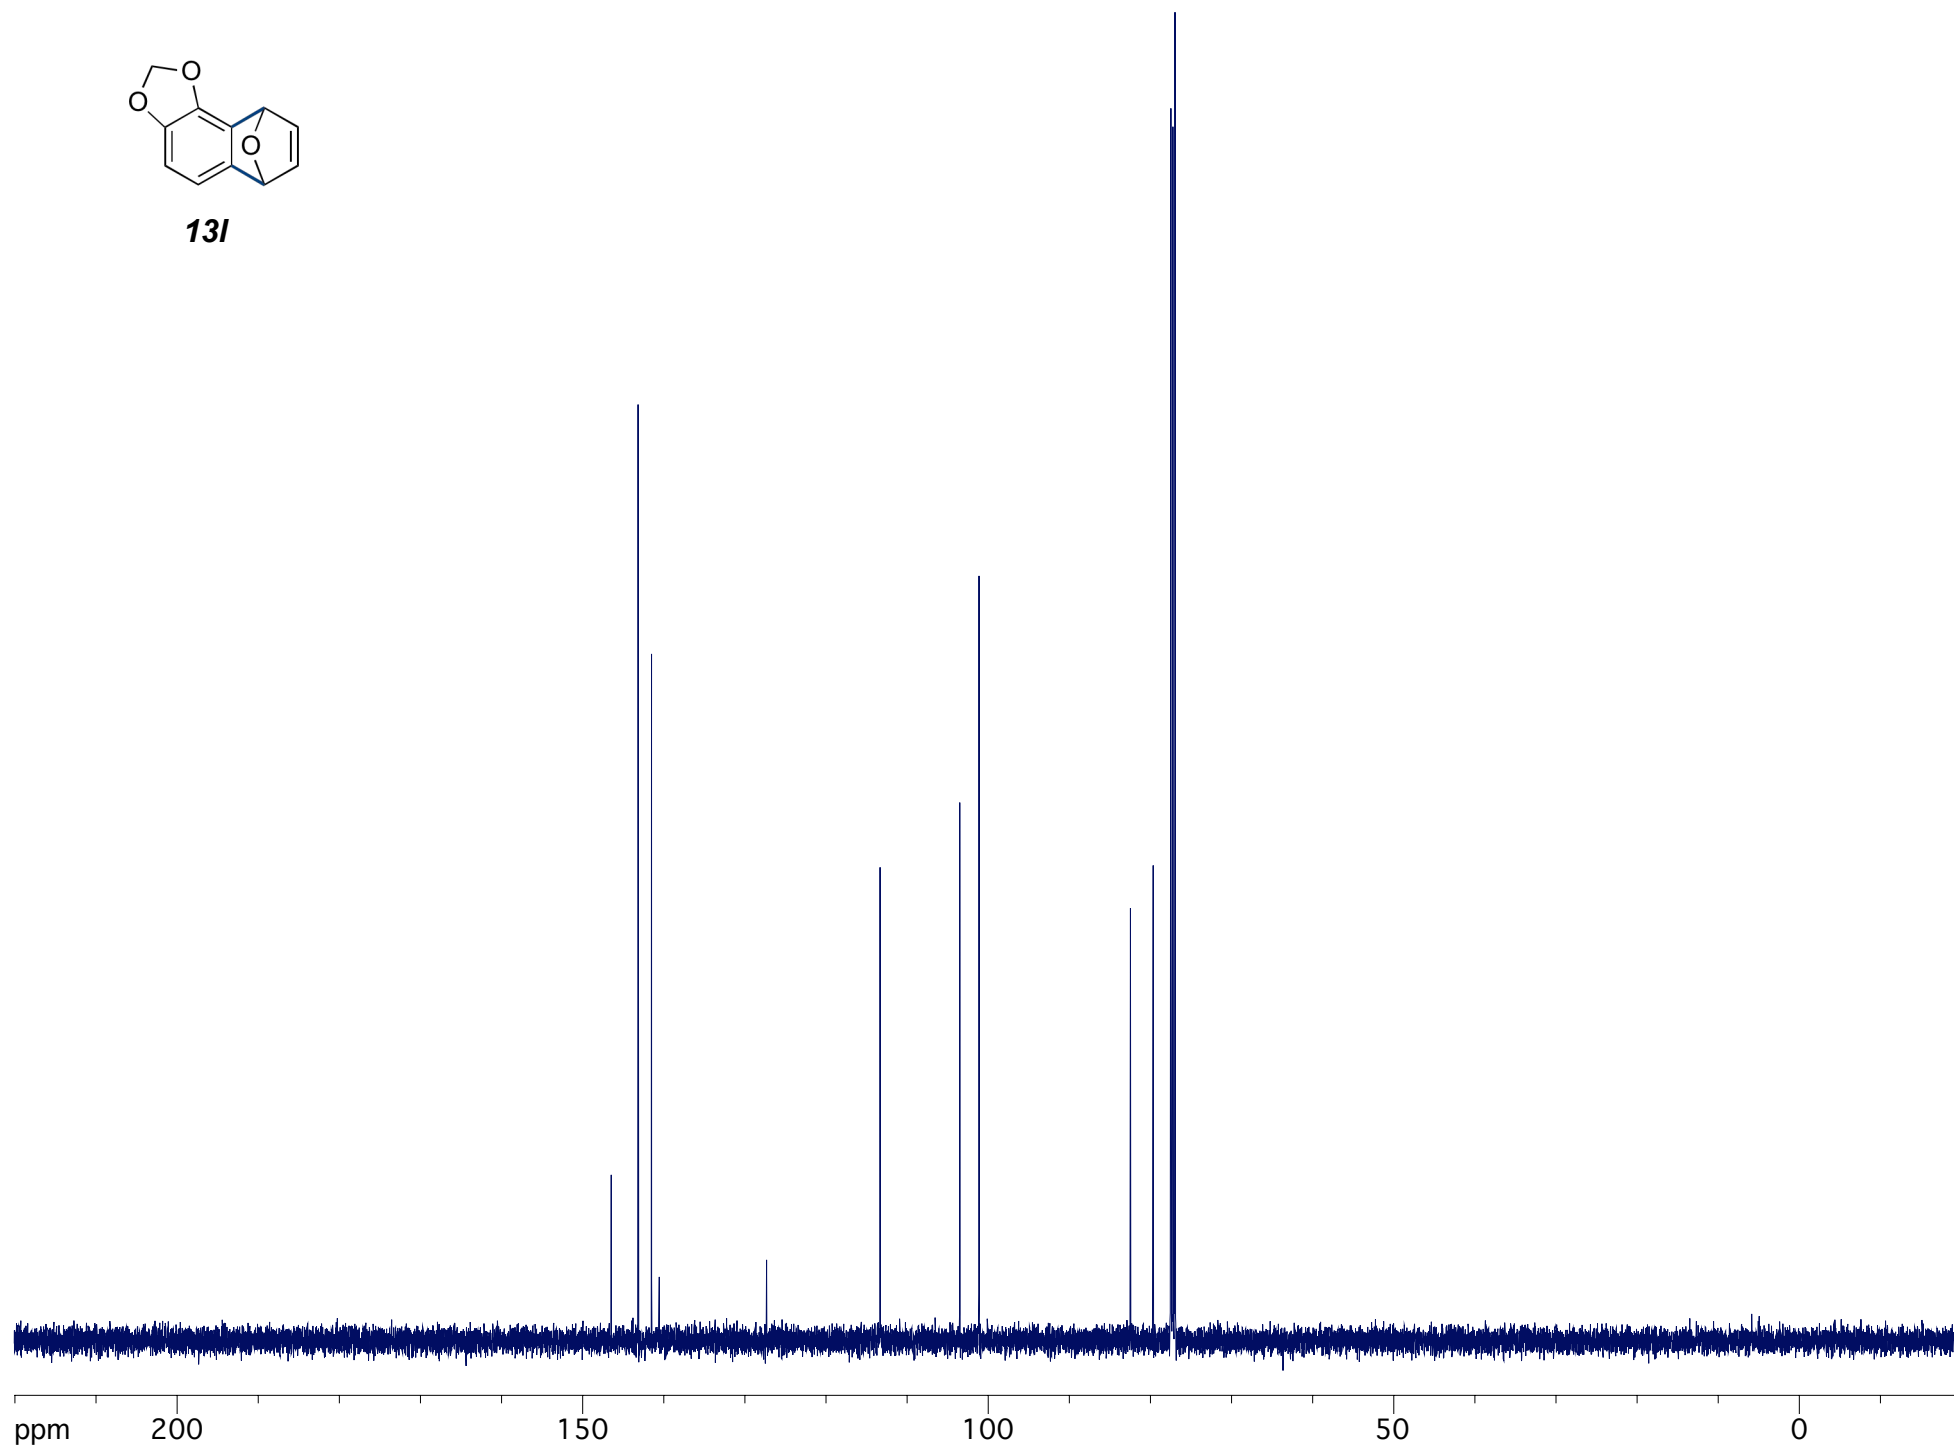

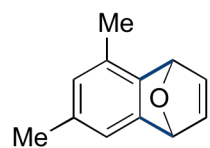**13m**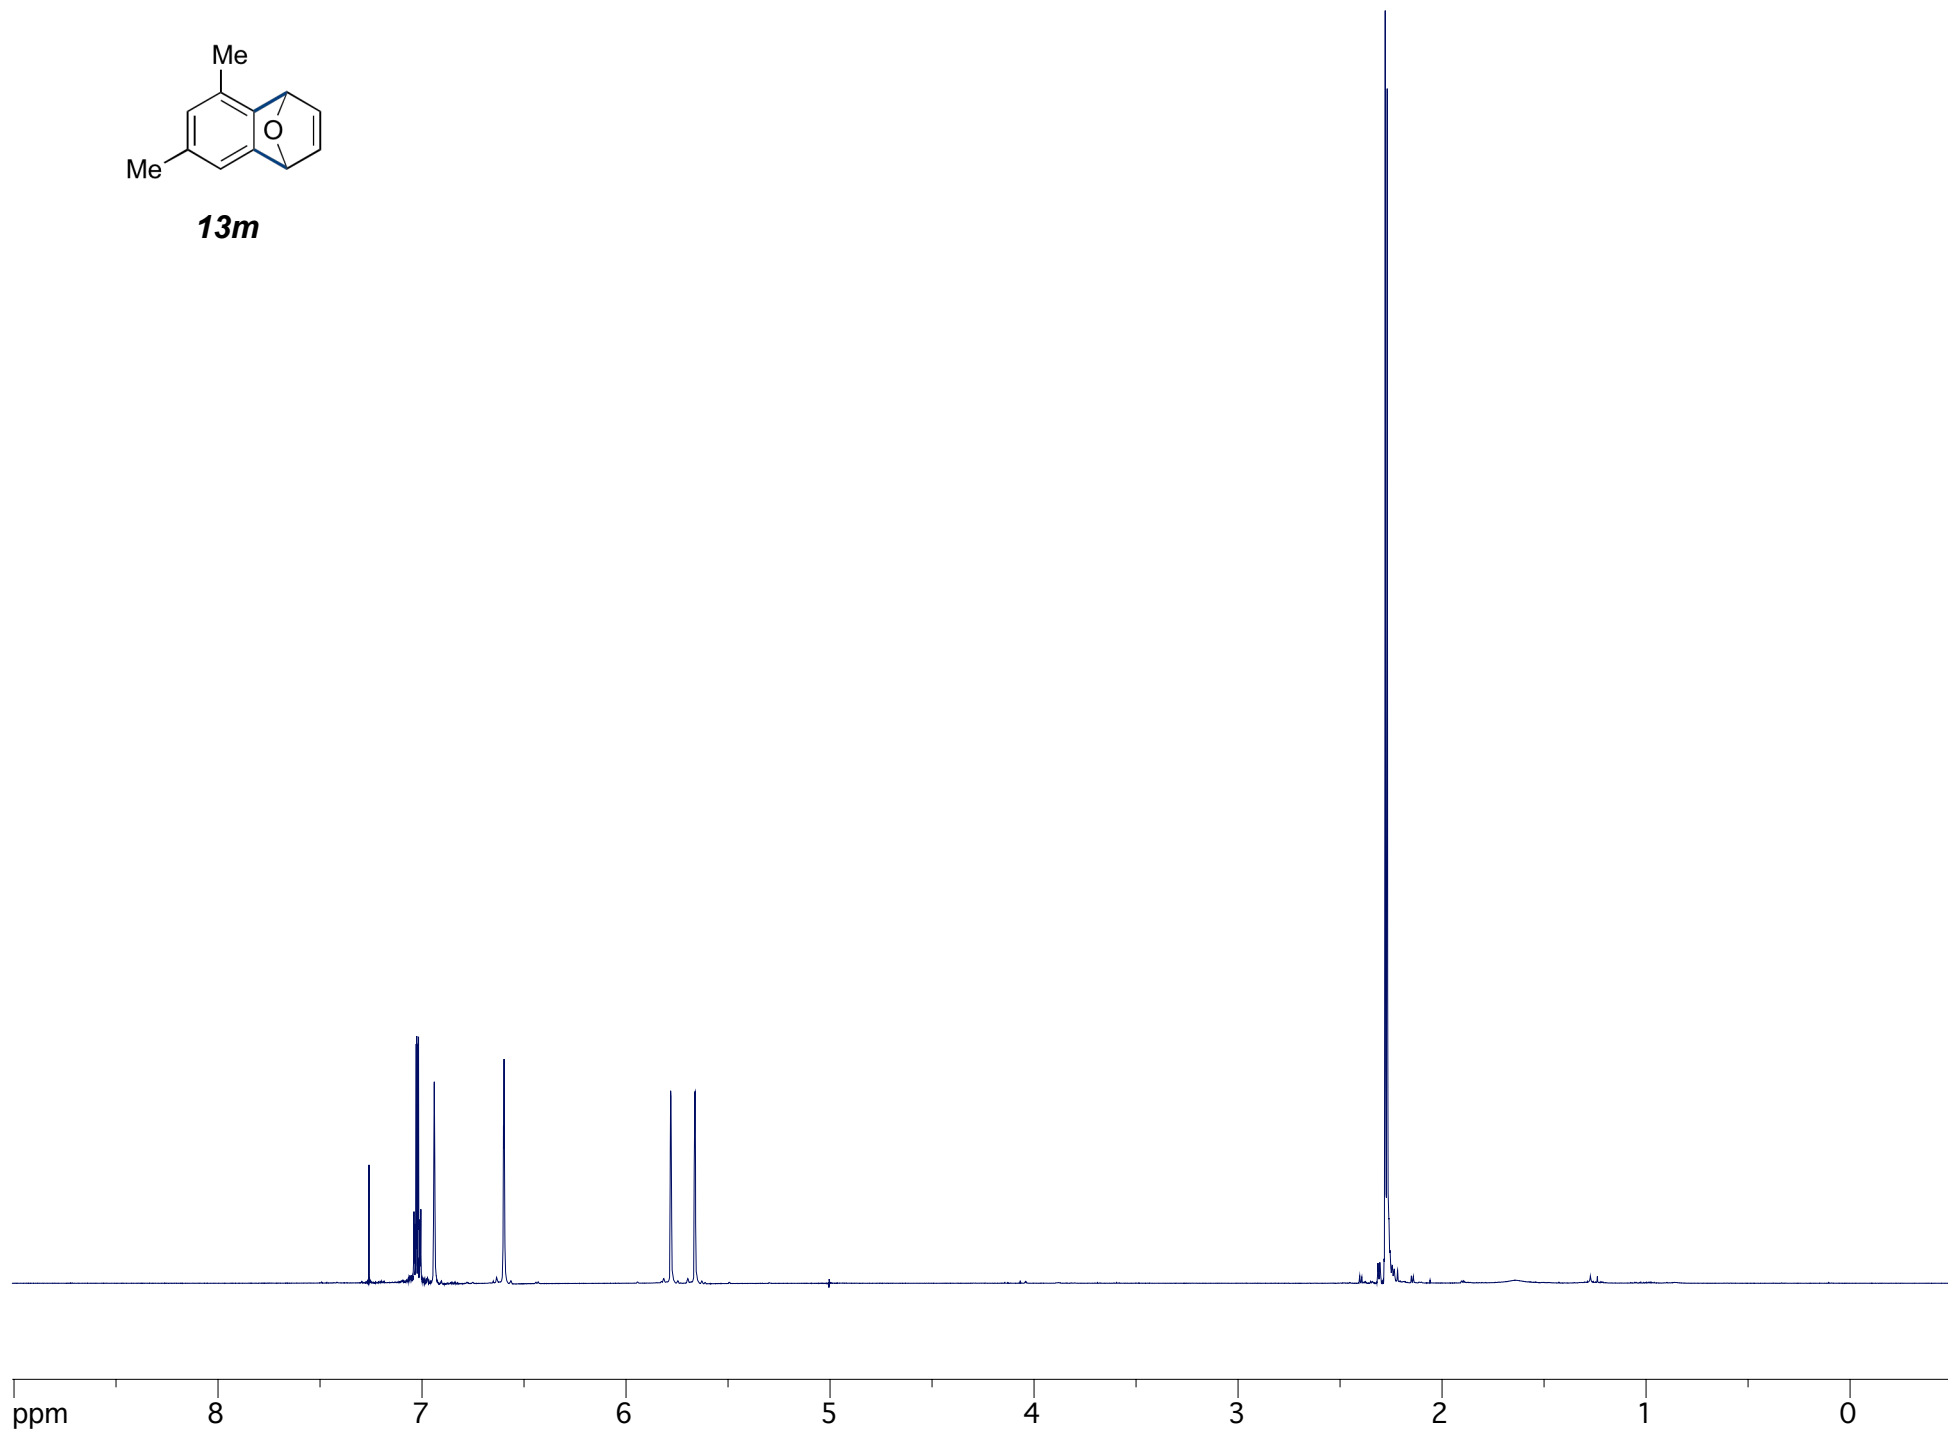

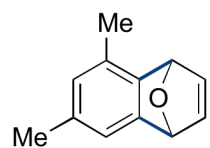**13m**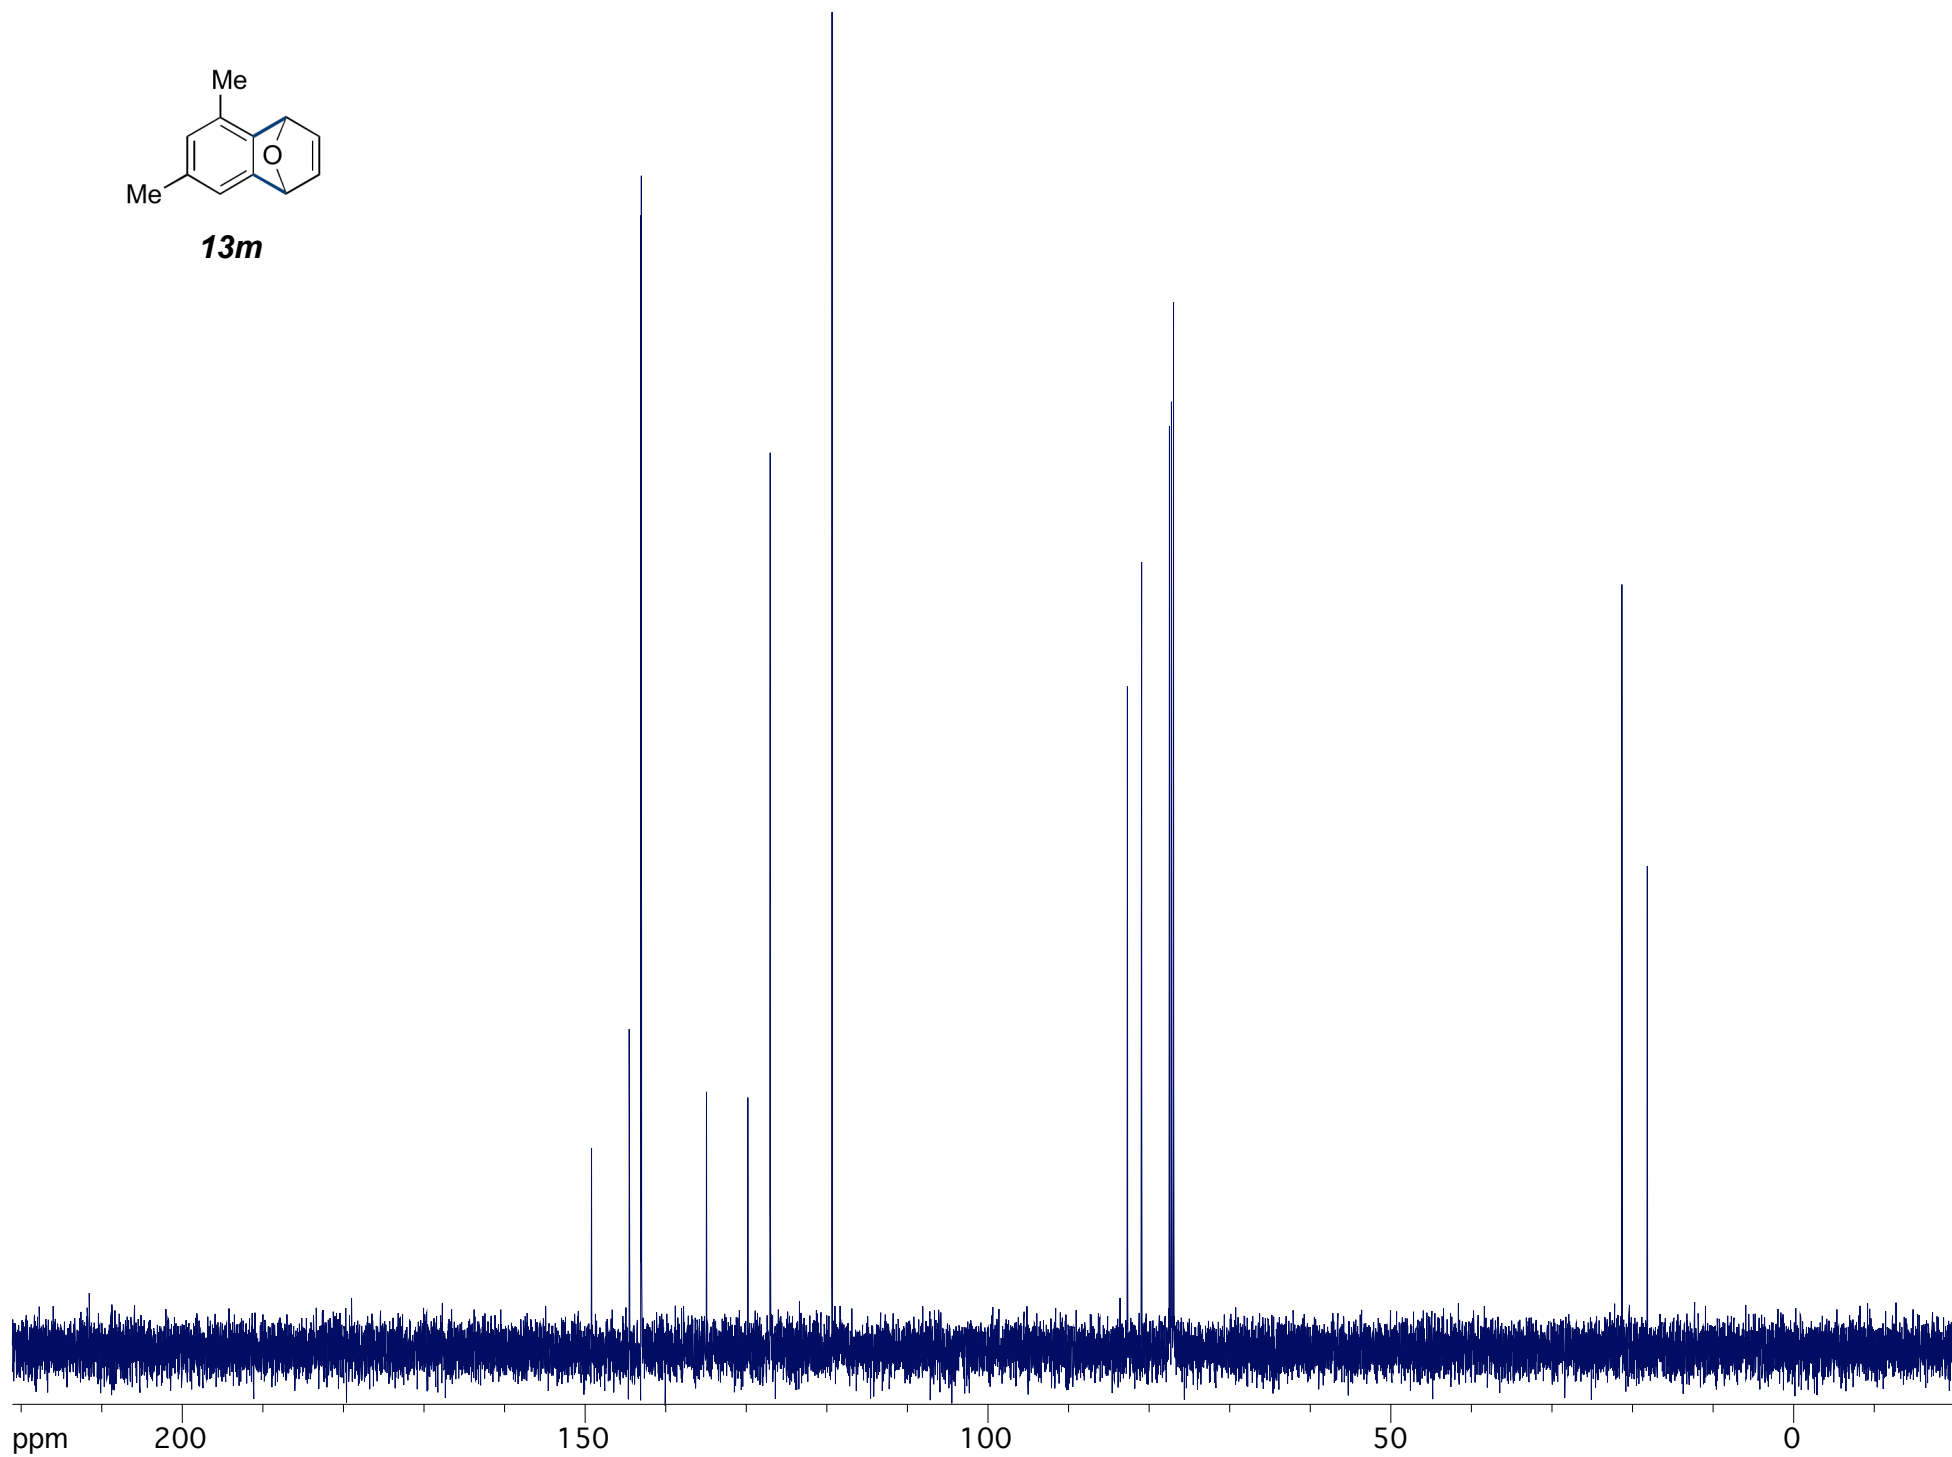

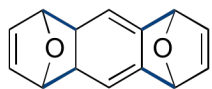**13n**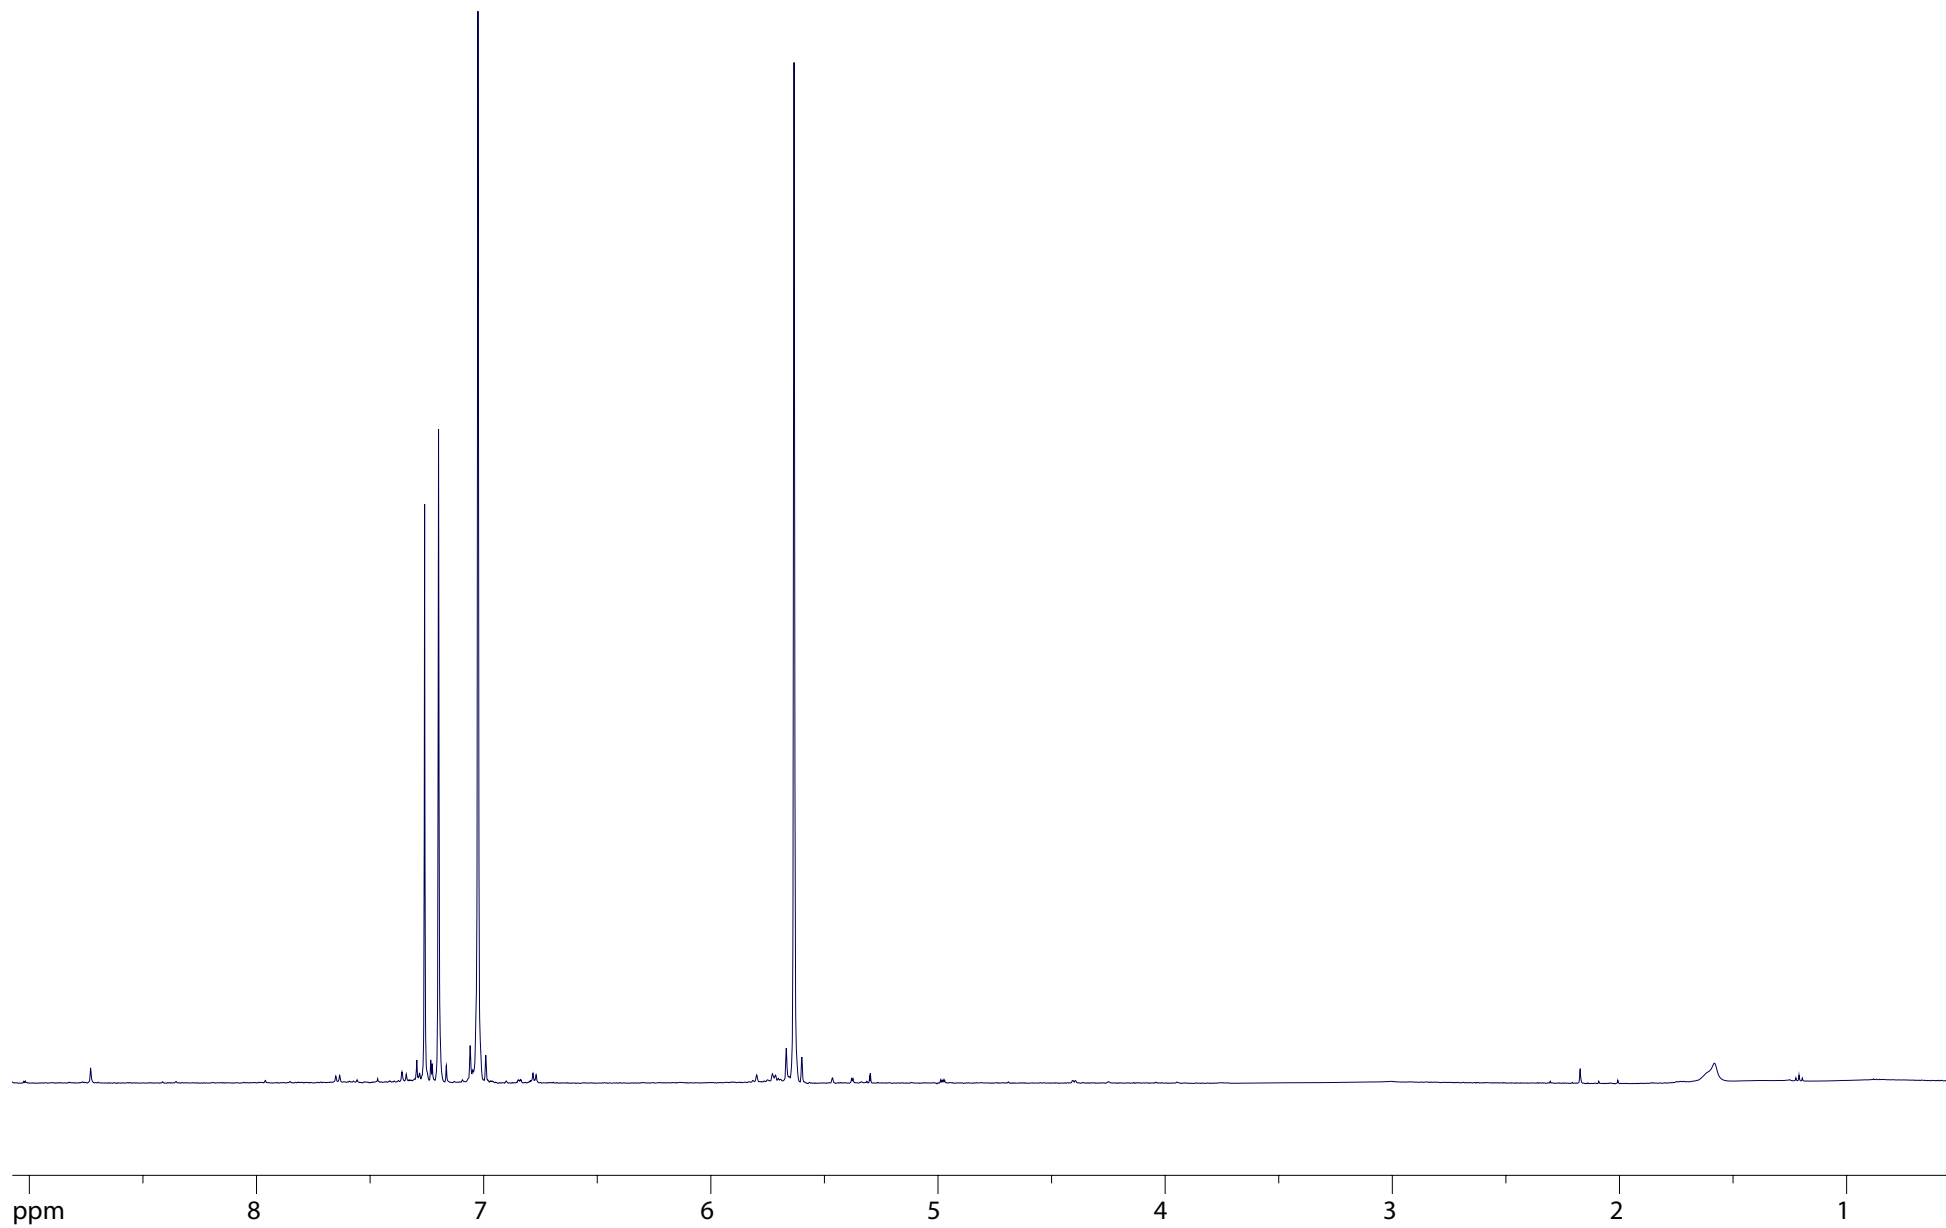

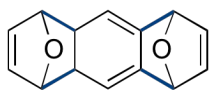**13n**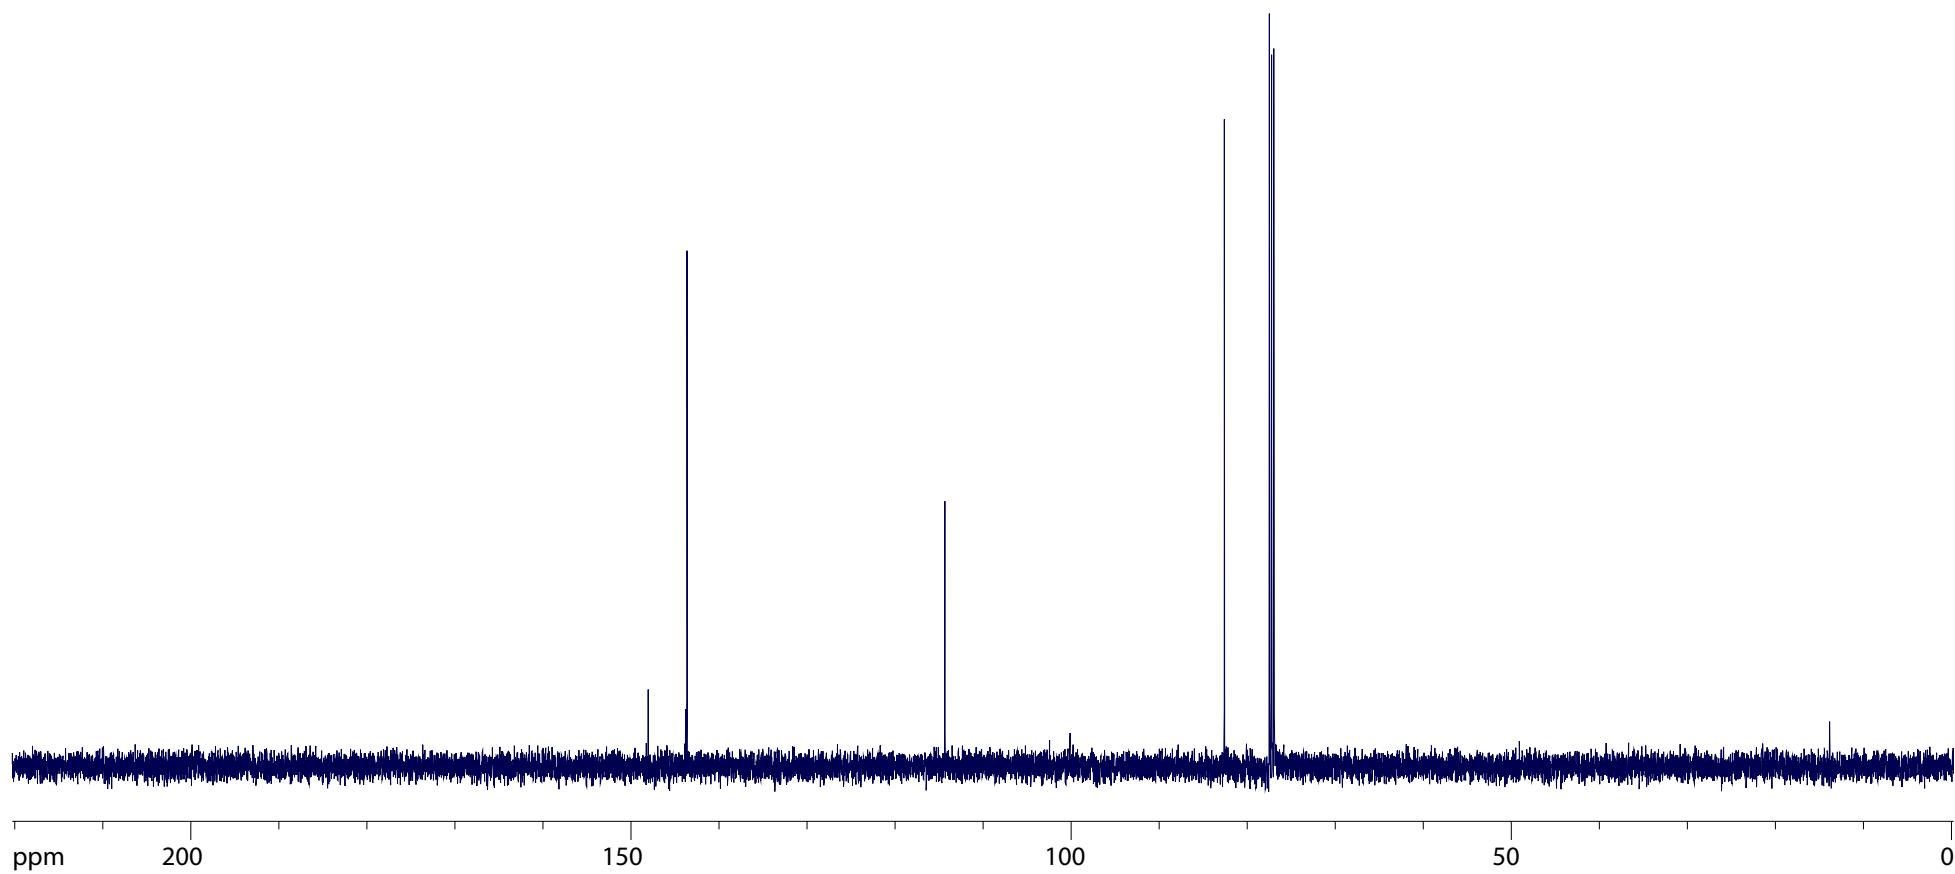

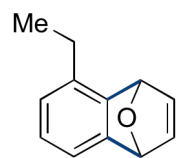**13o**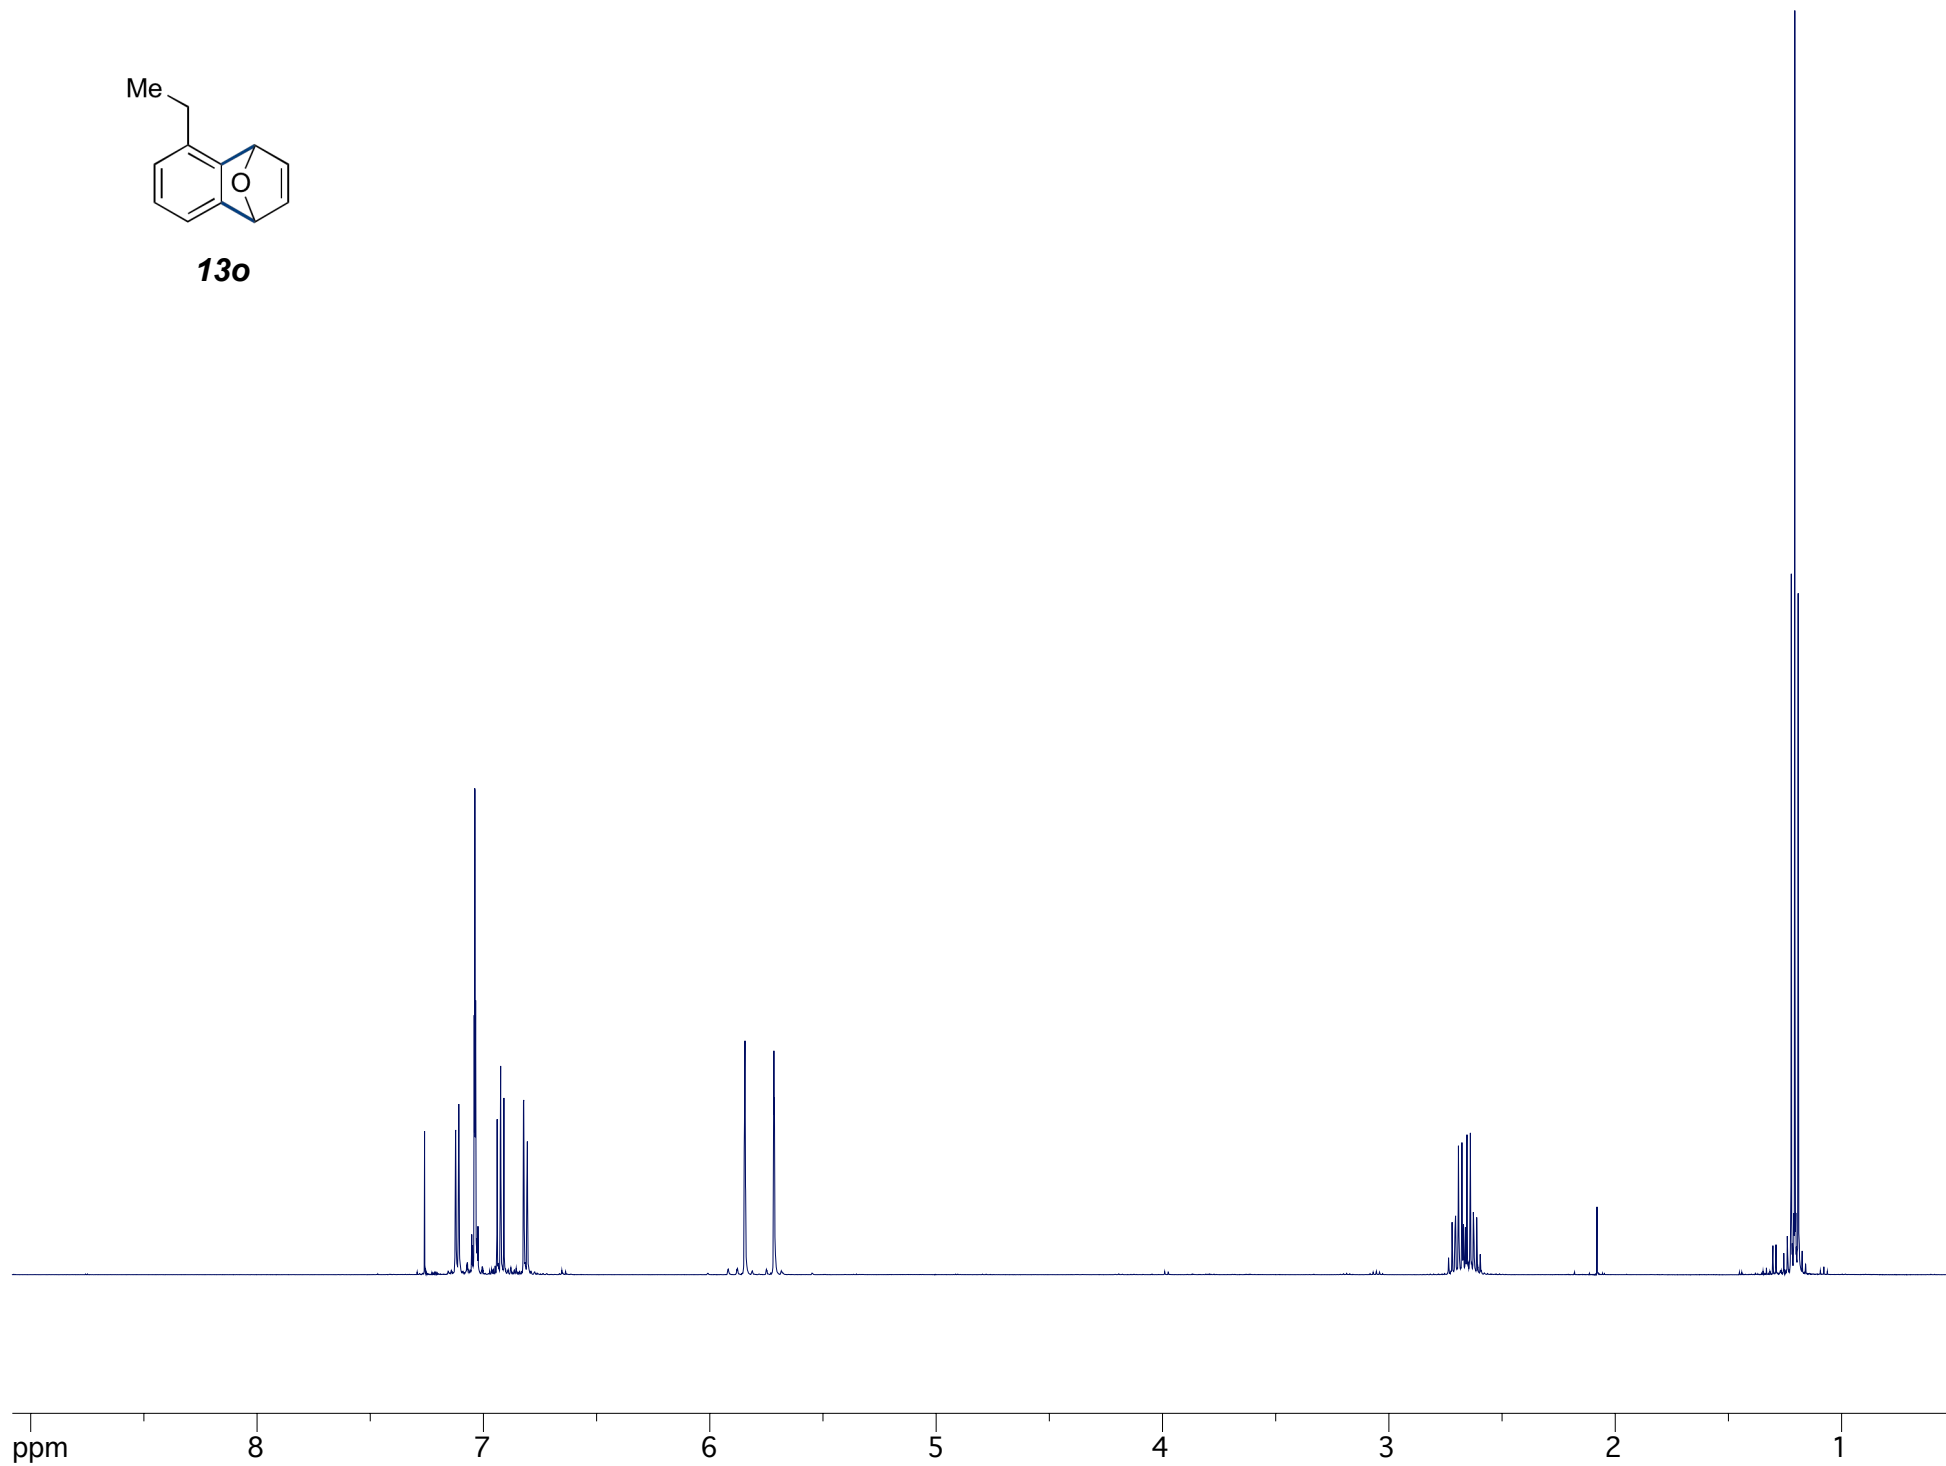

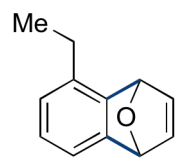**13o**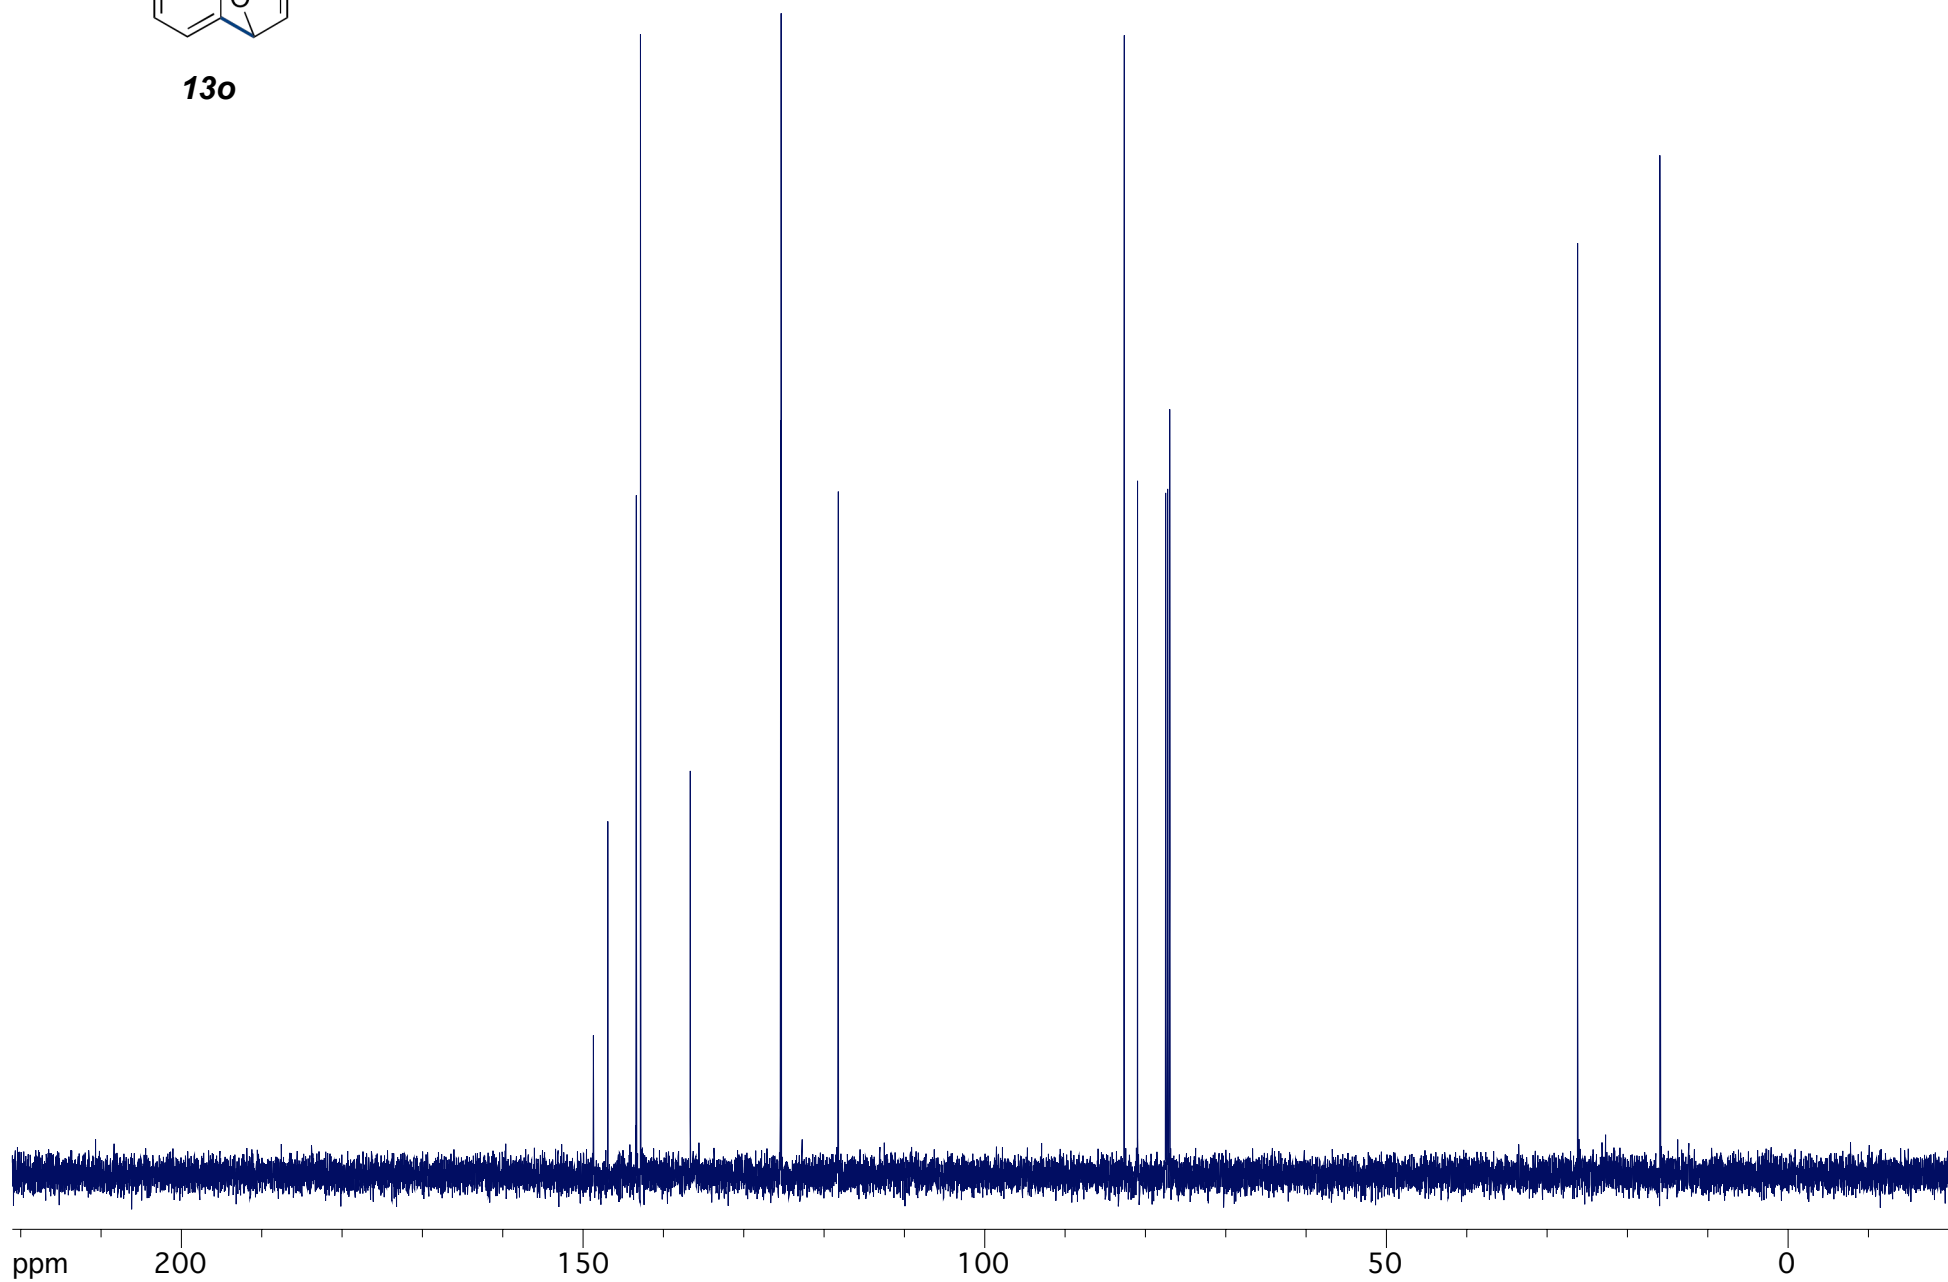

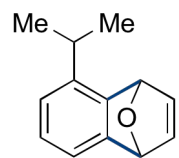**13p**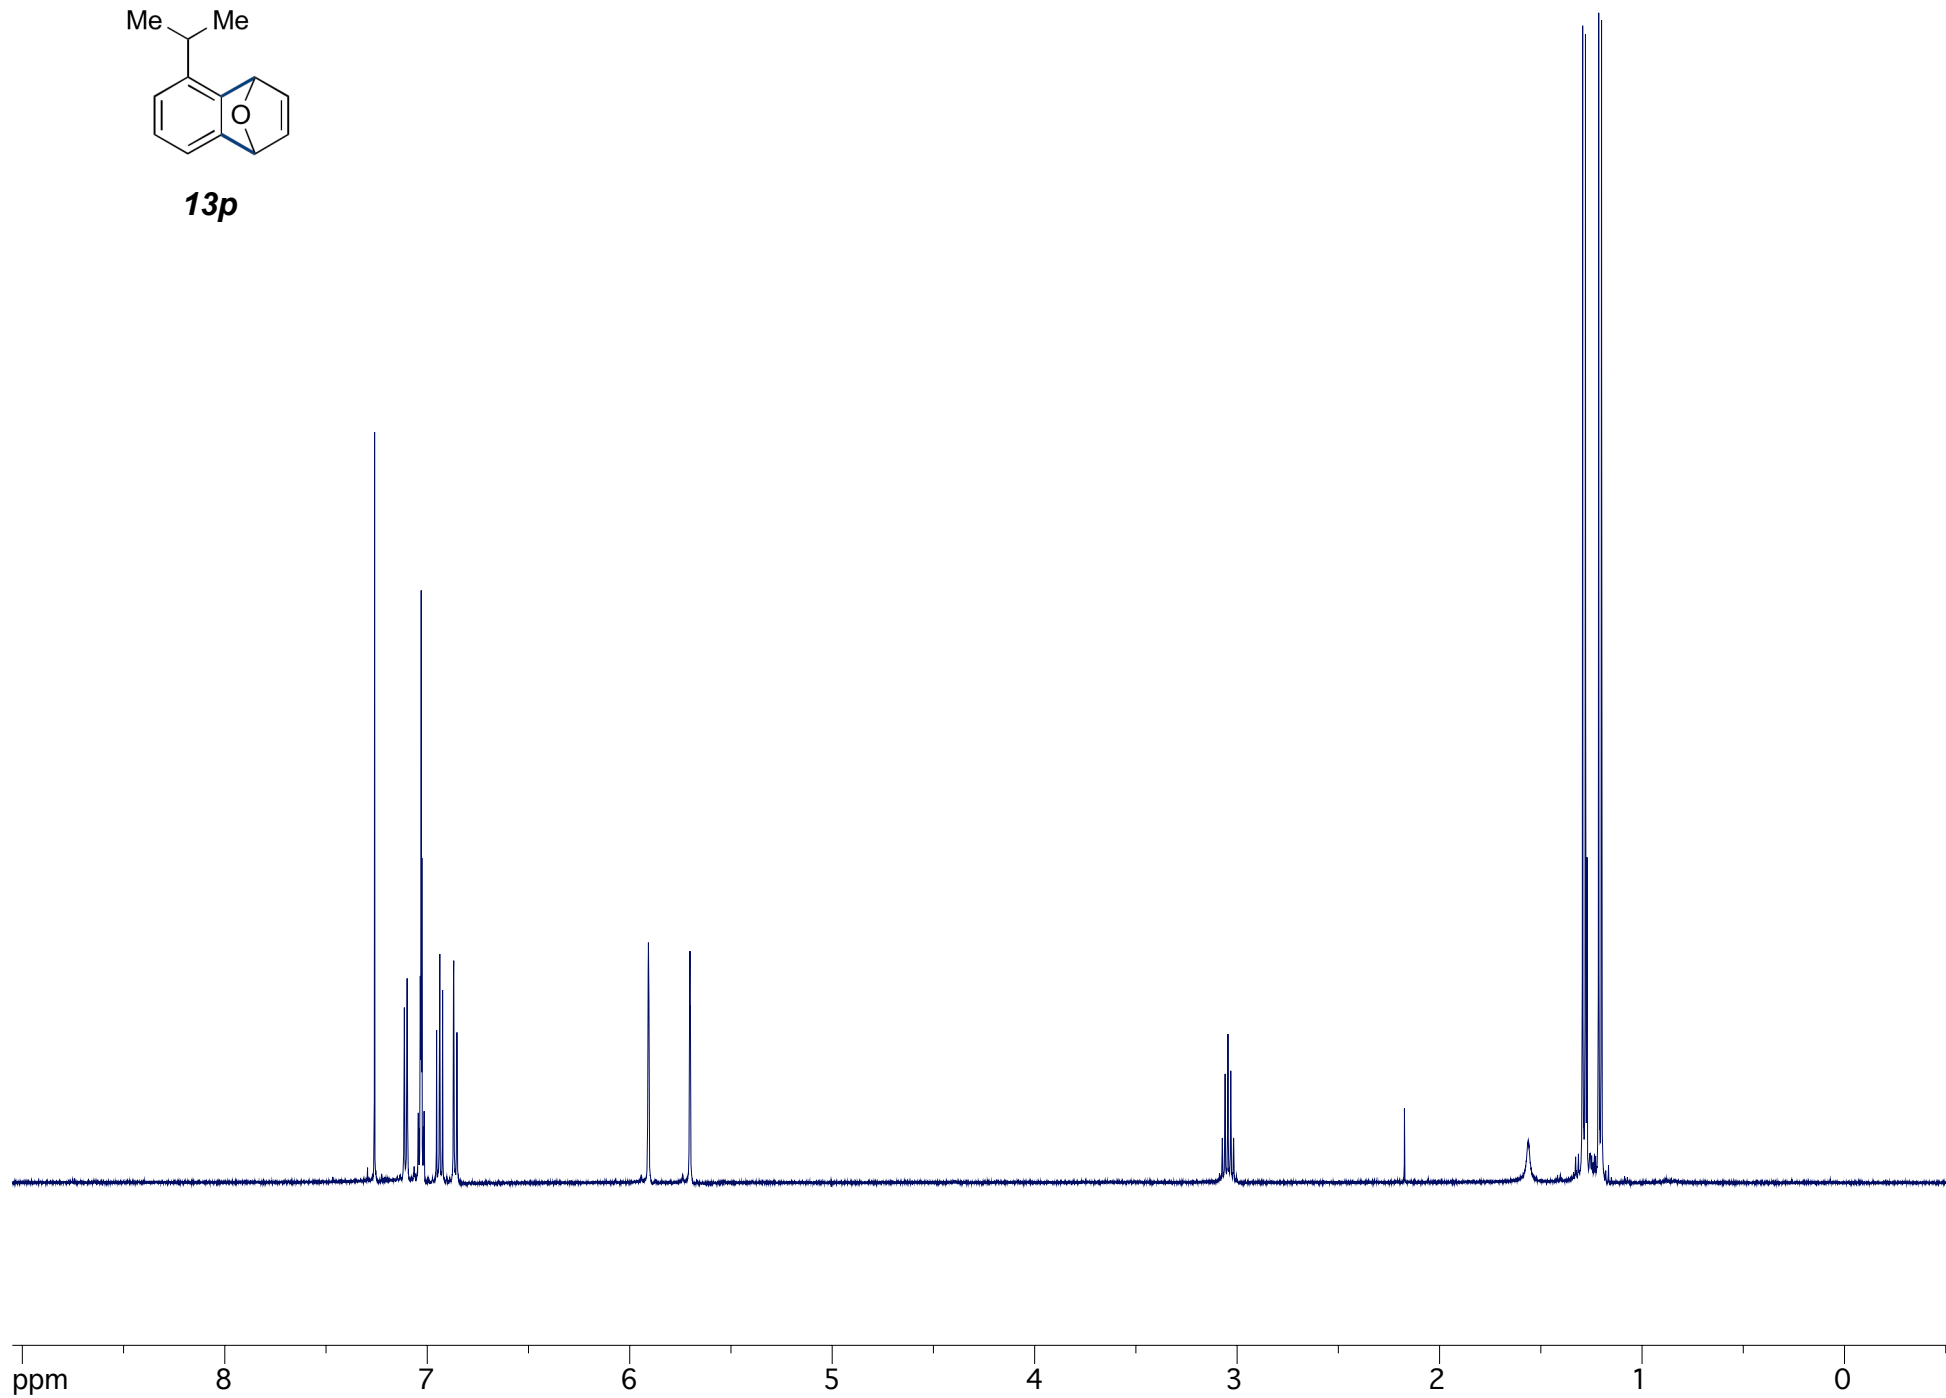



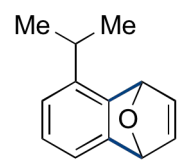**13p**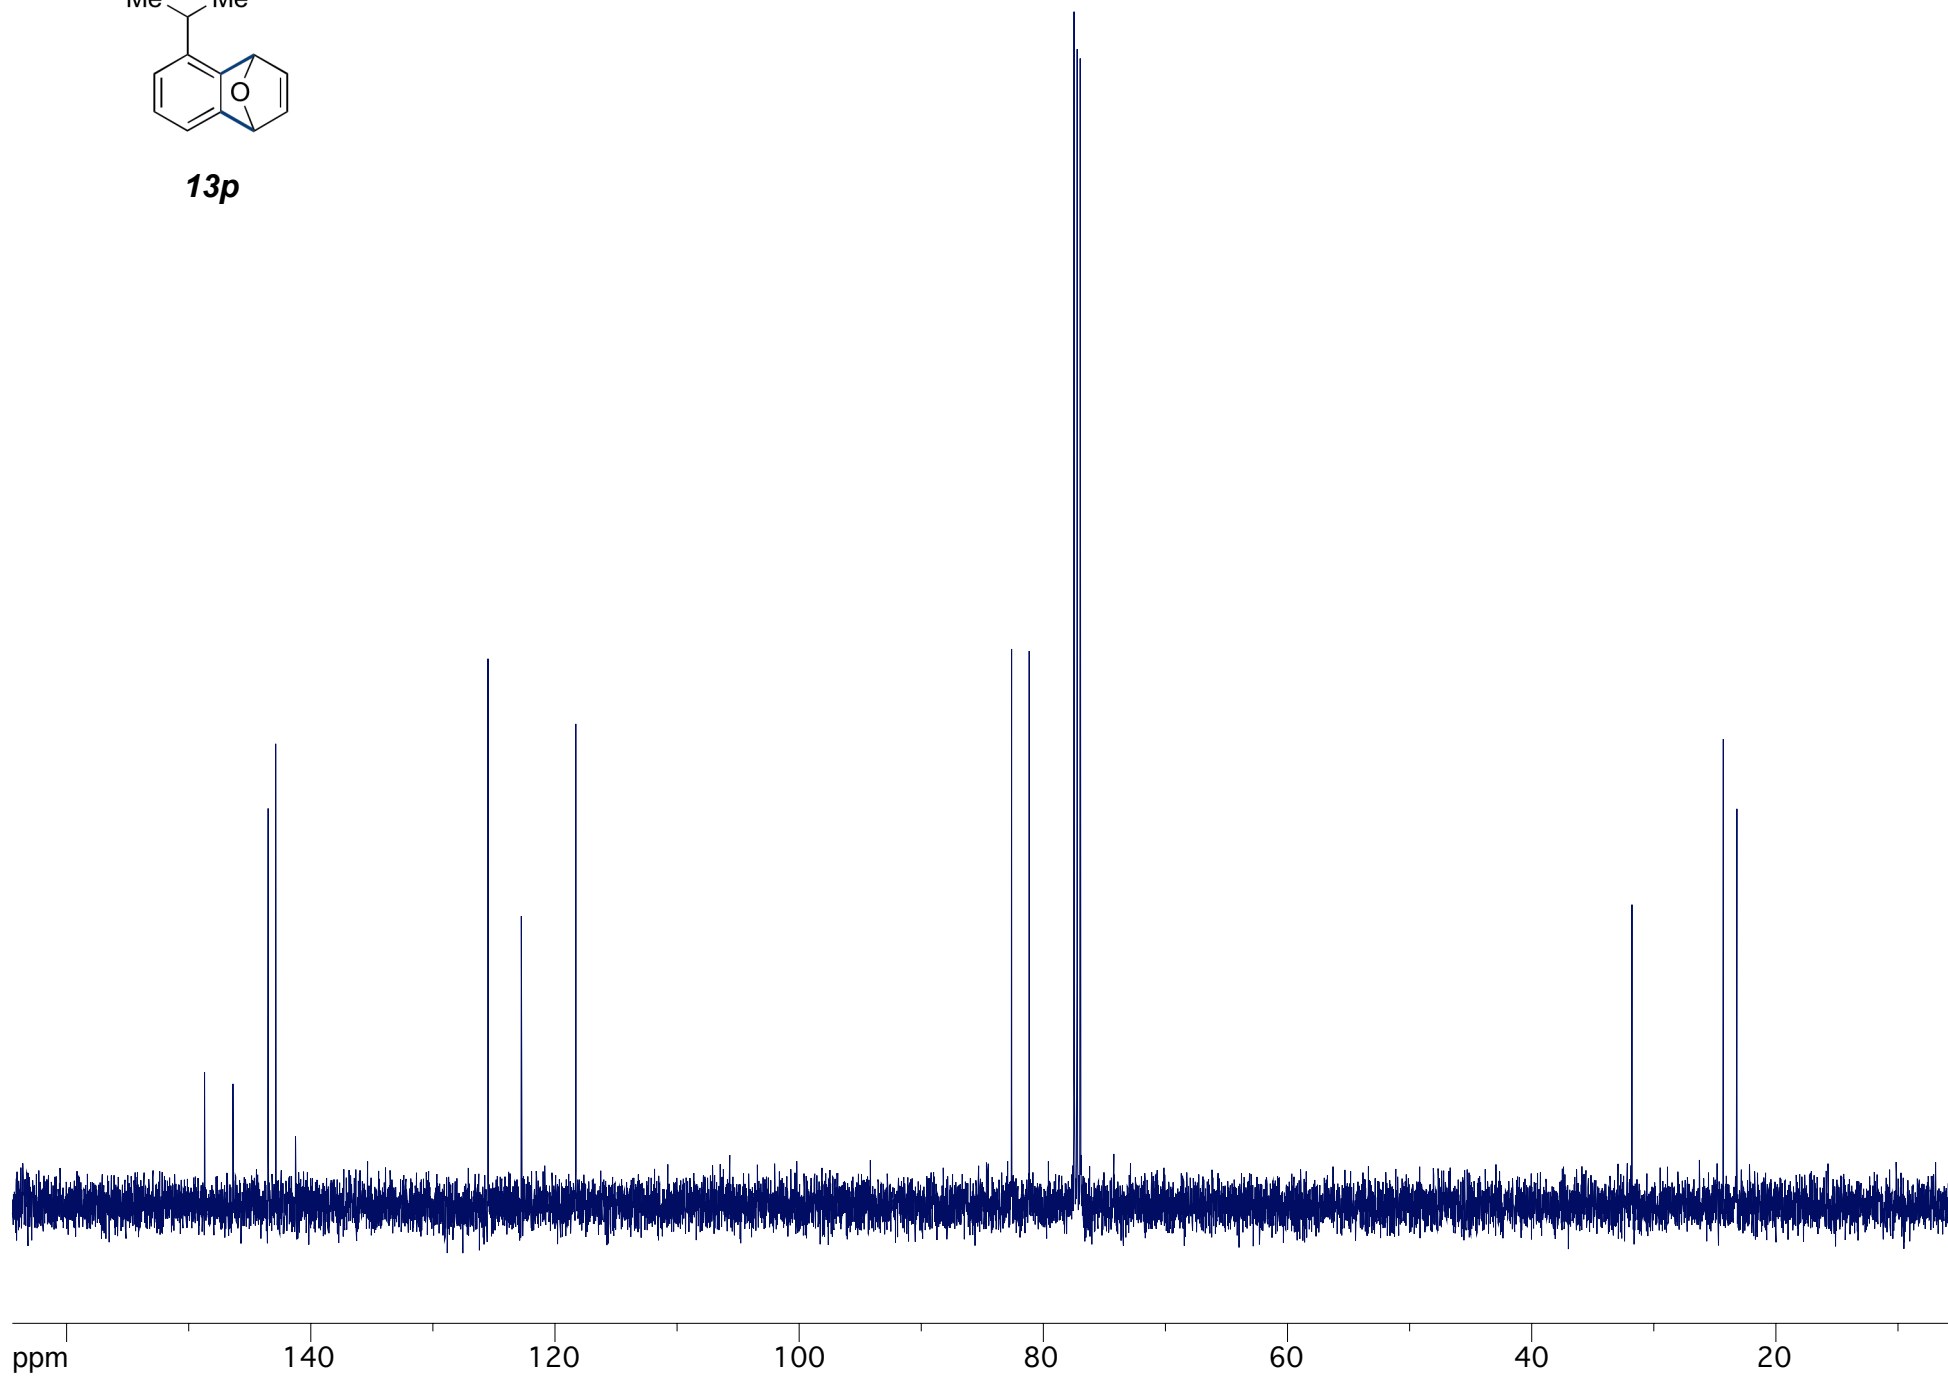

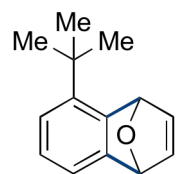**13q**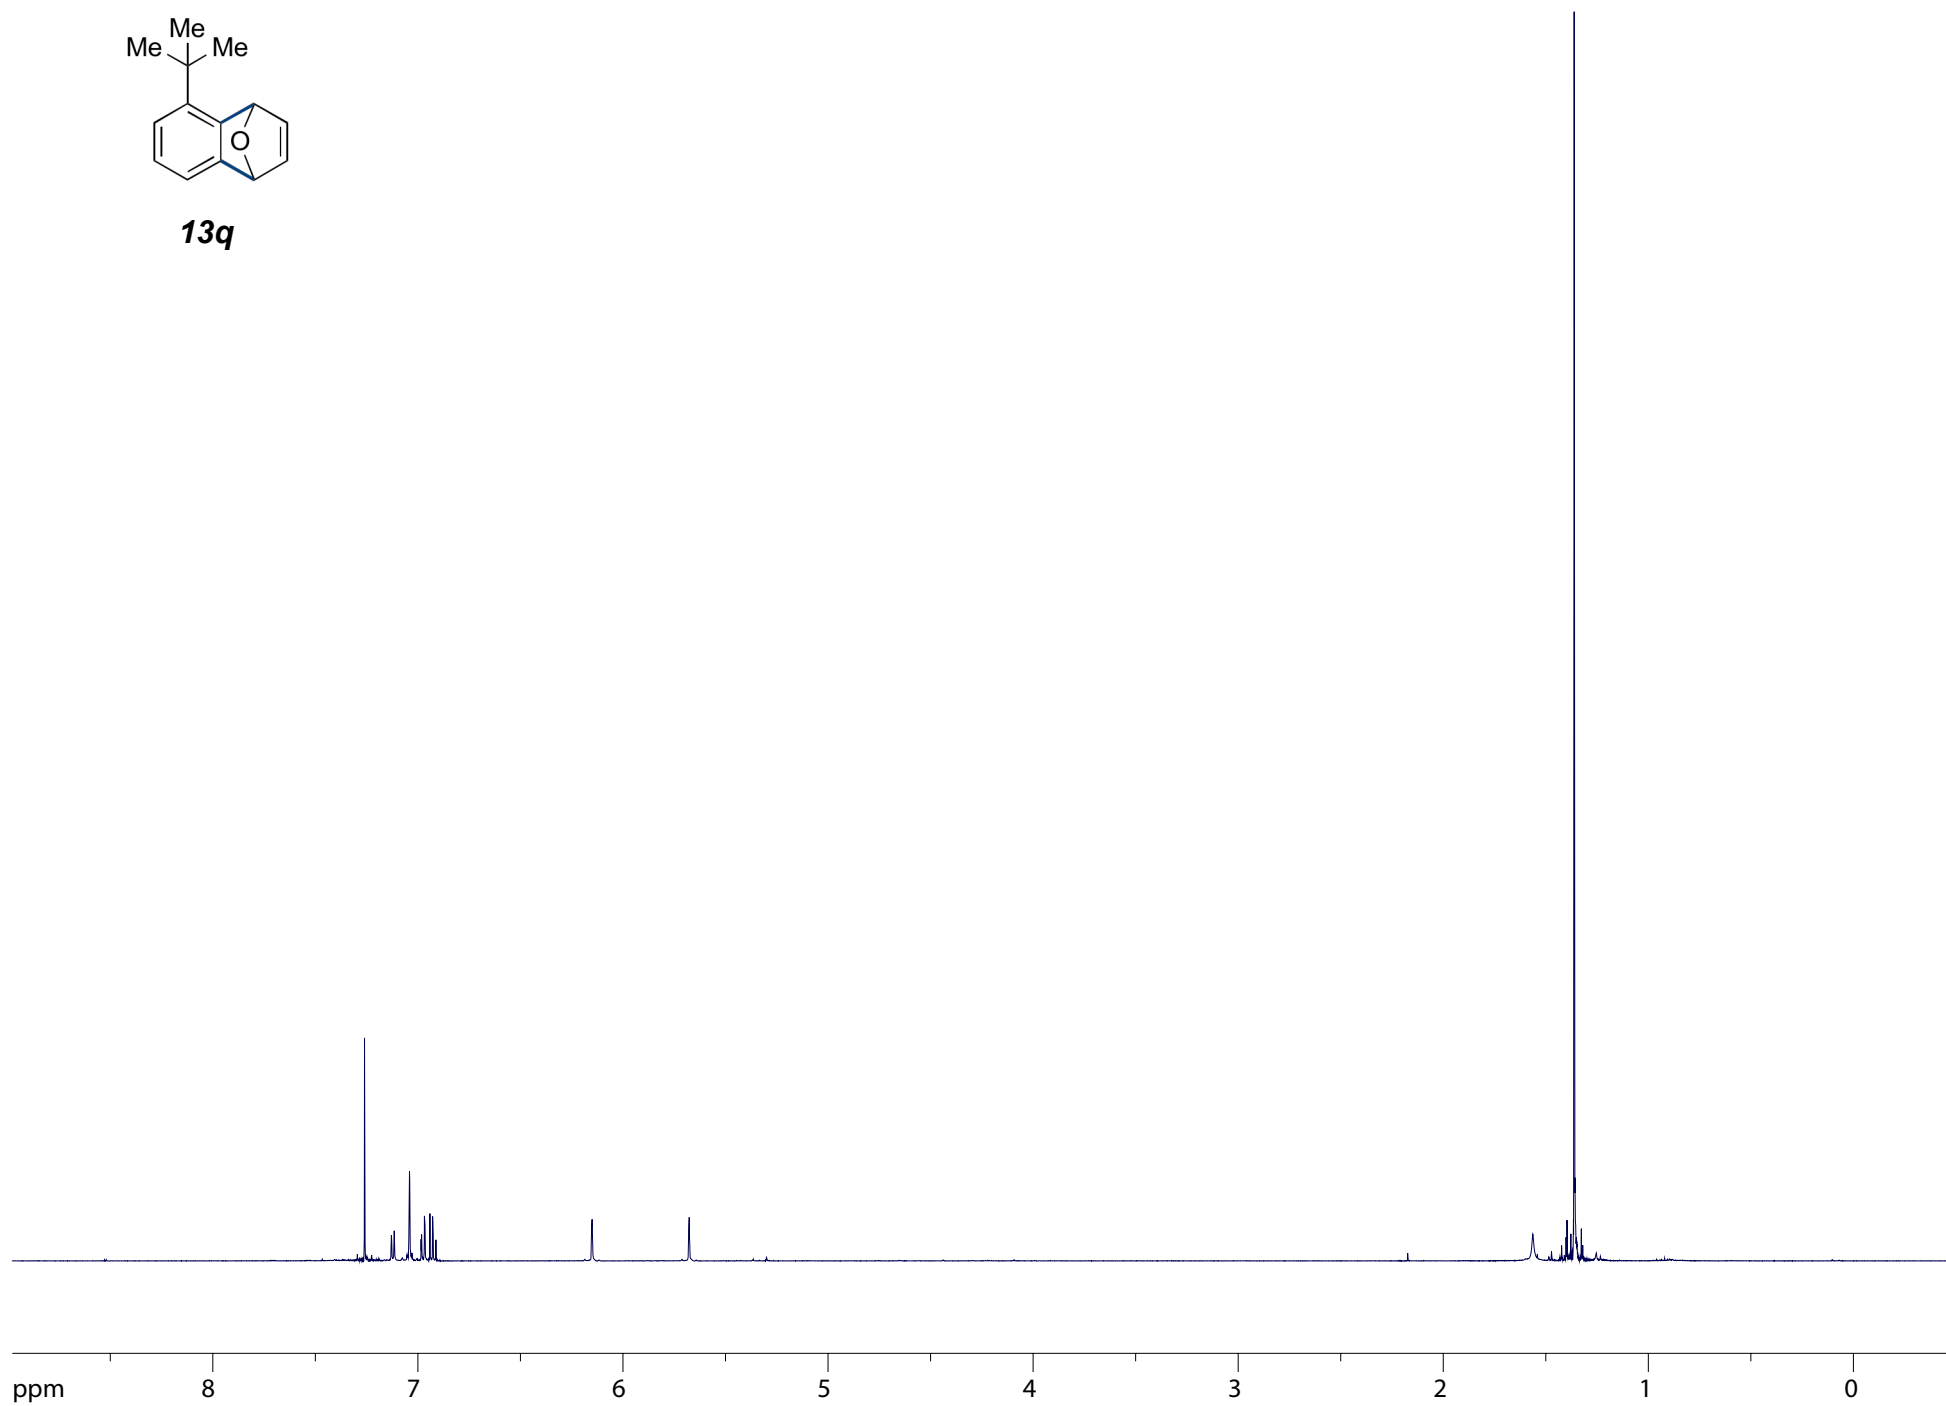

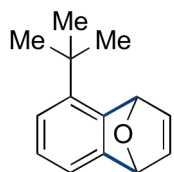**13q**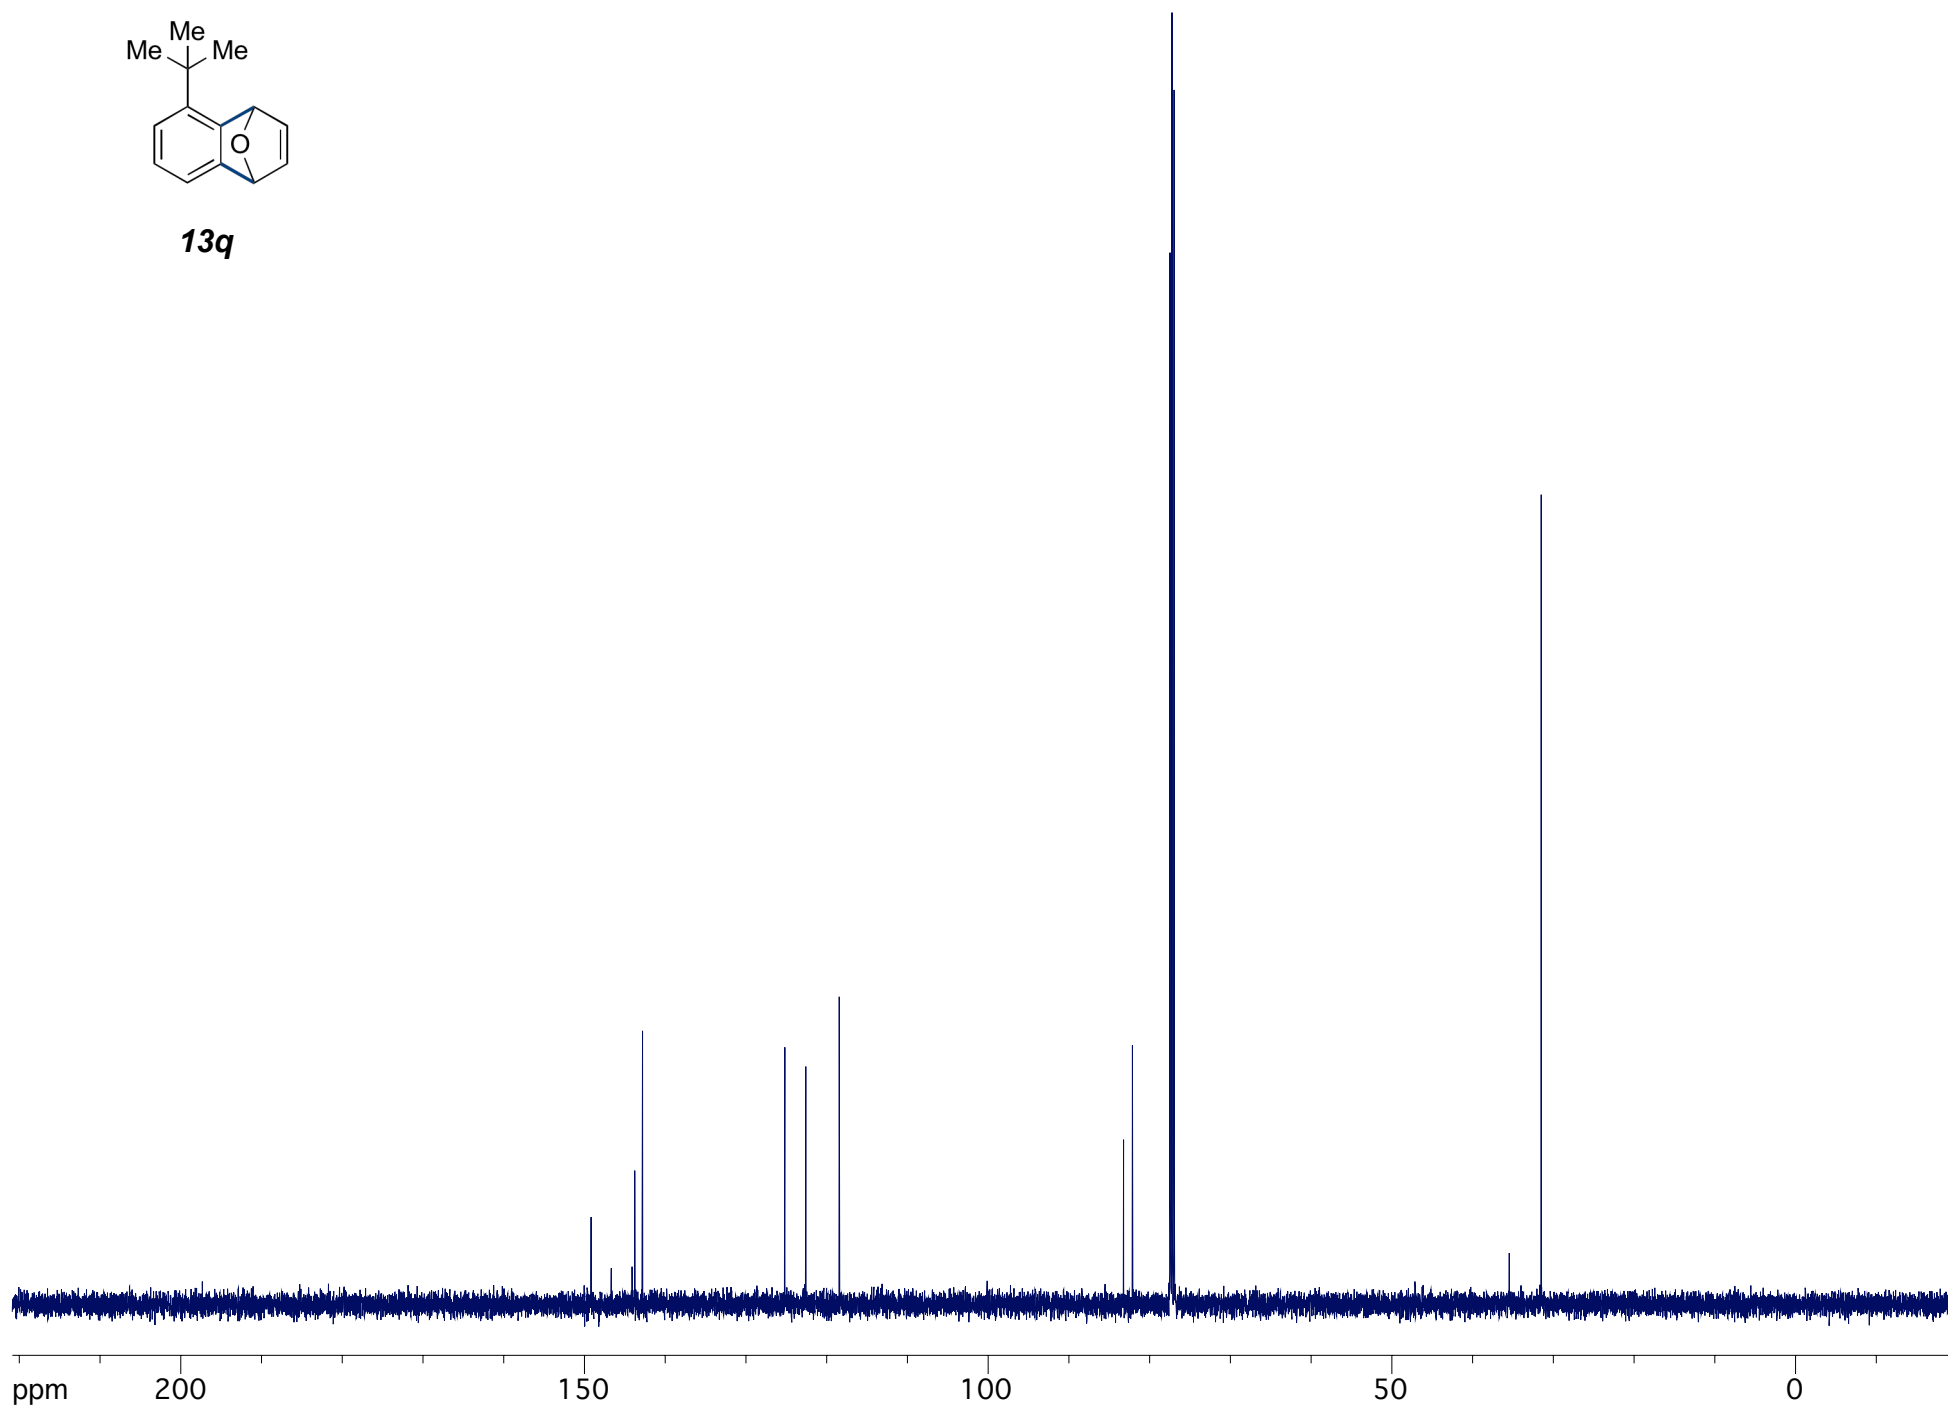

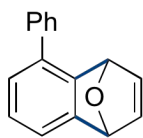**13r**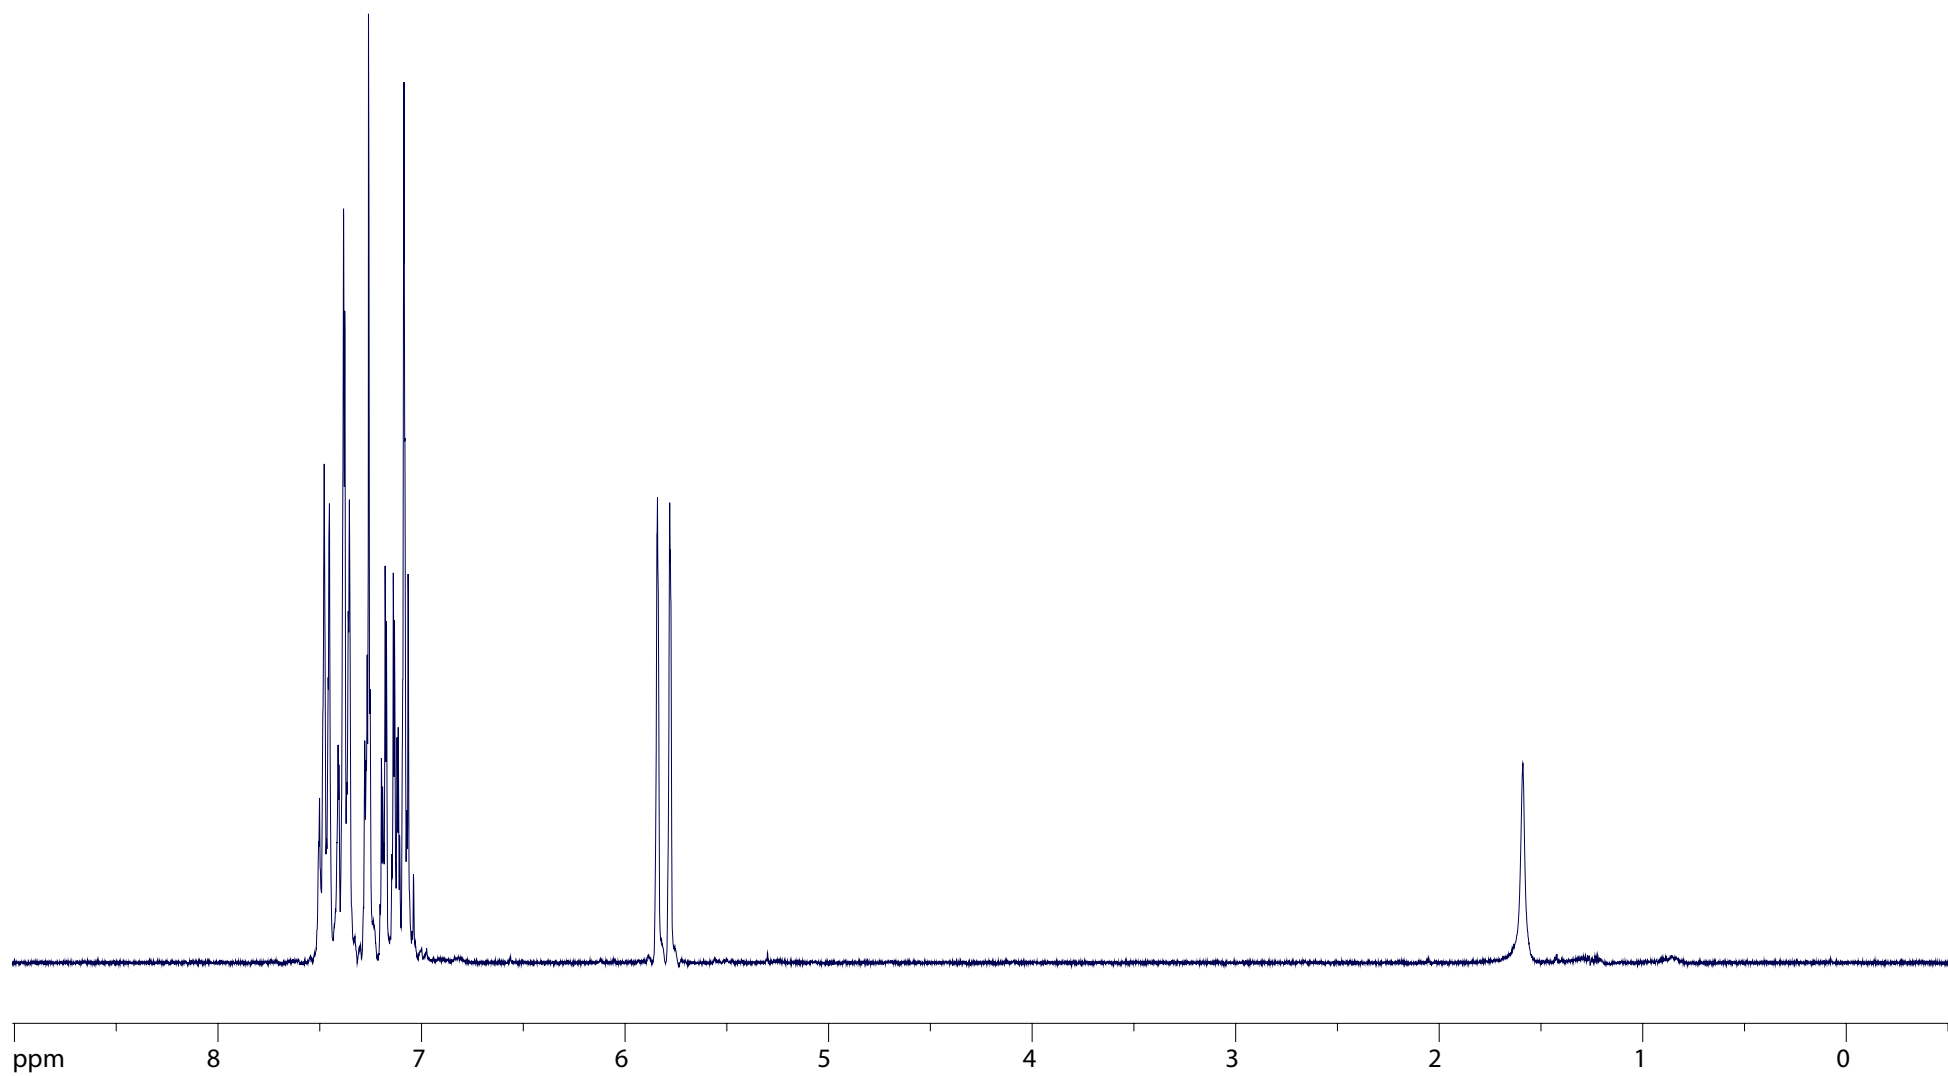

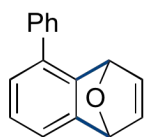**13r**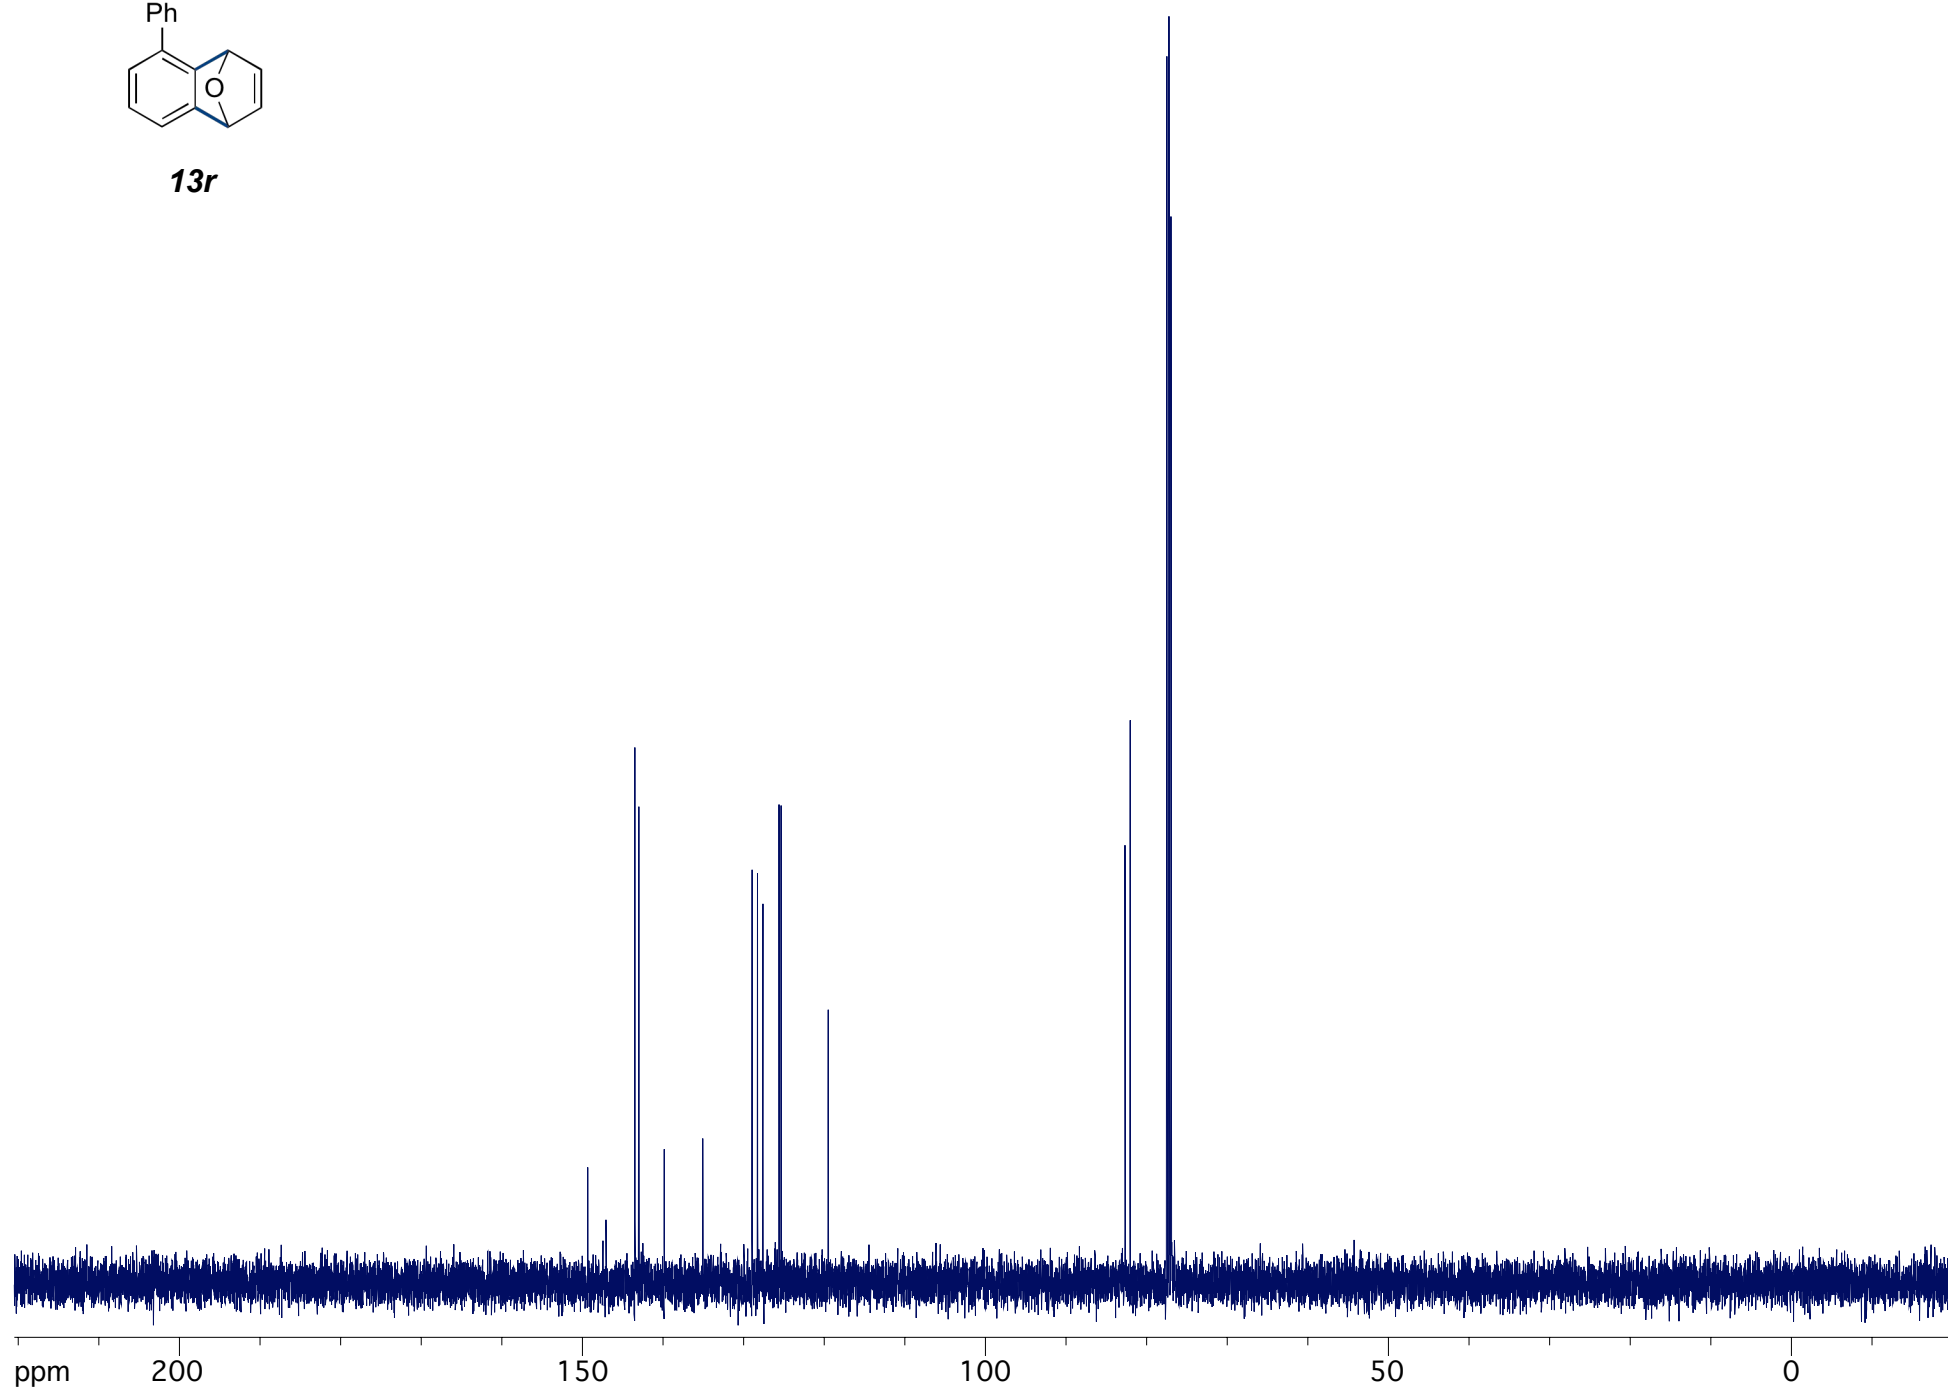

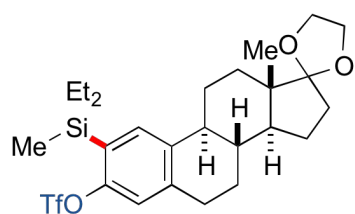**18**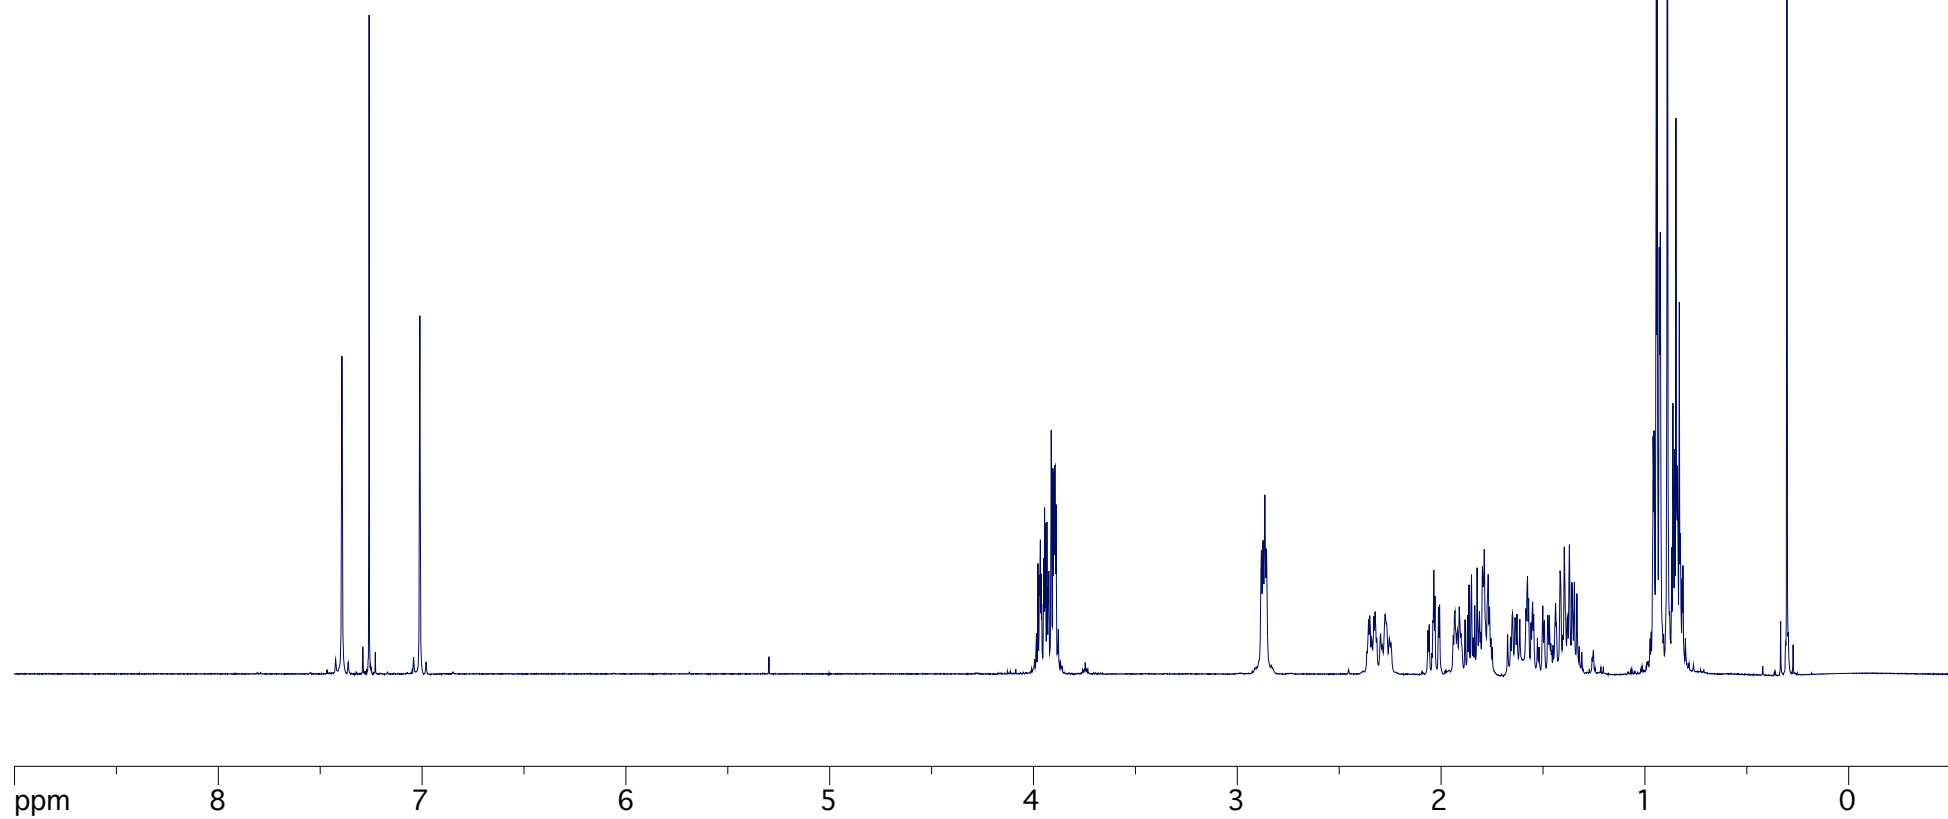

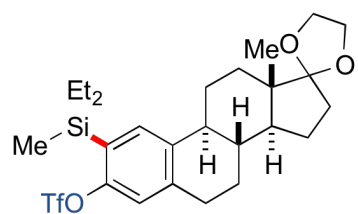**18**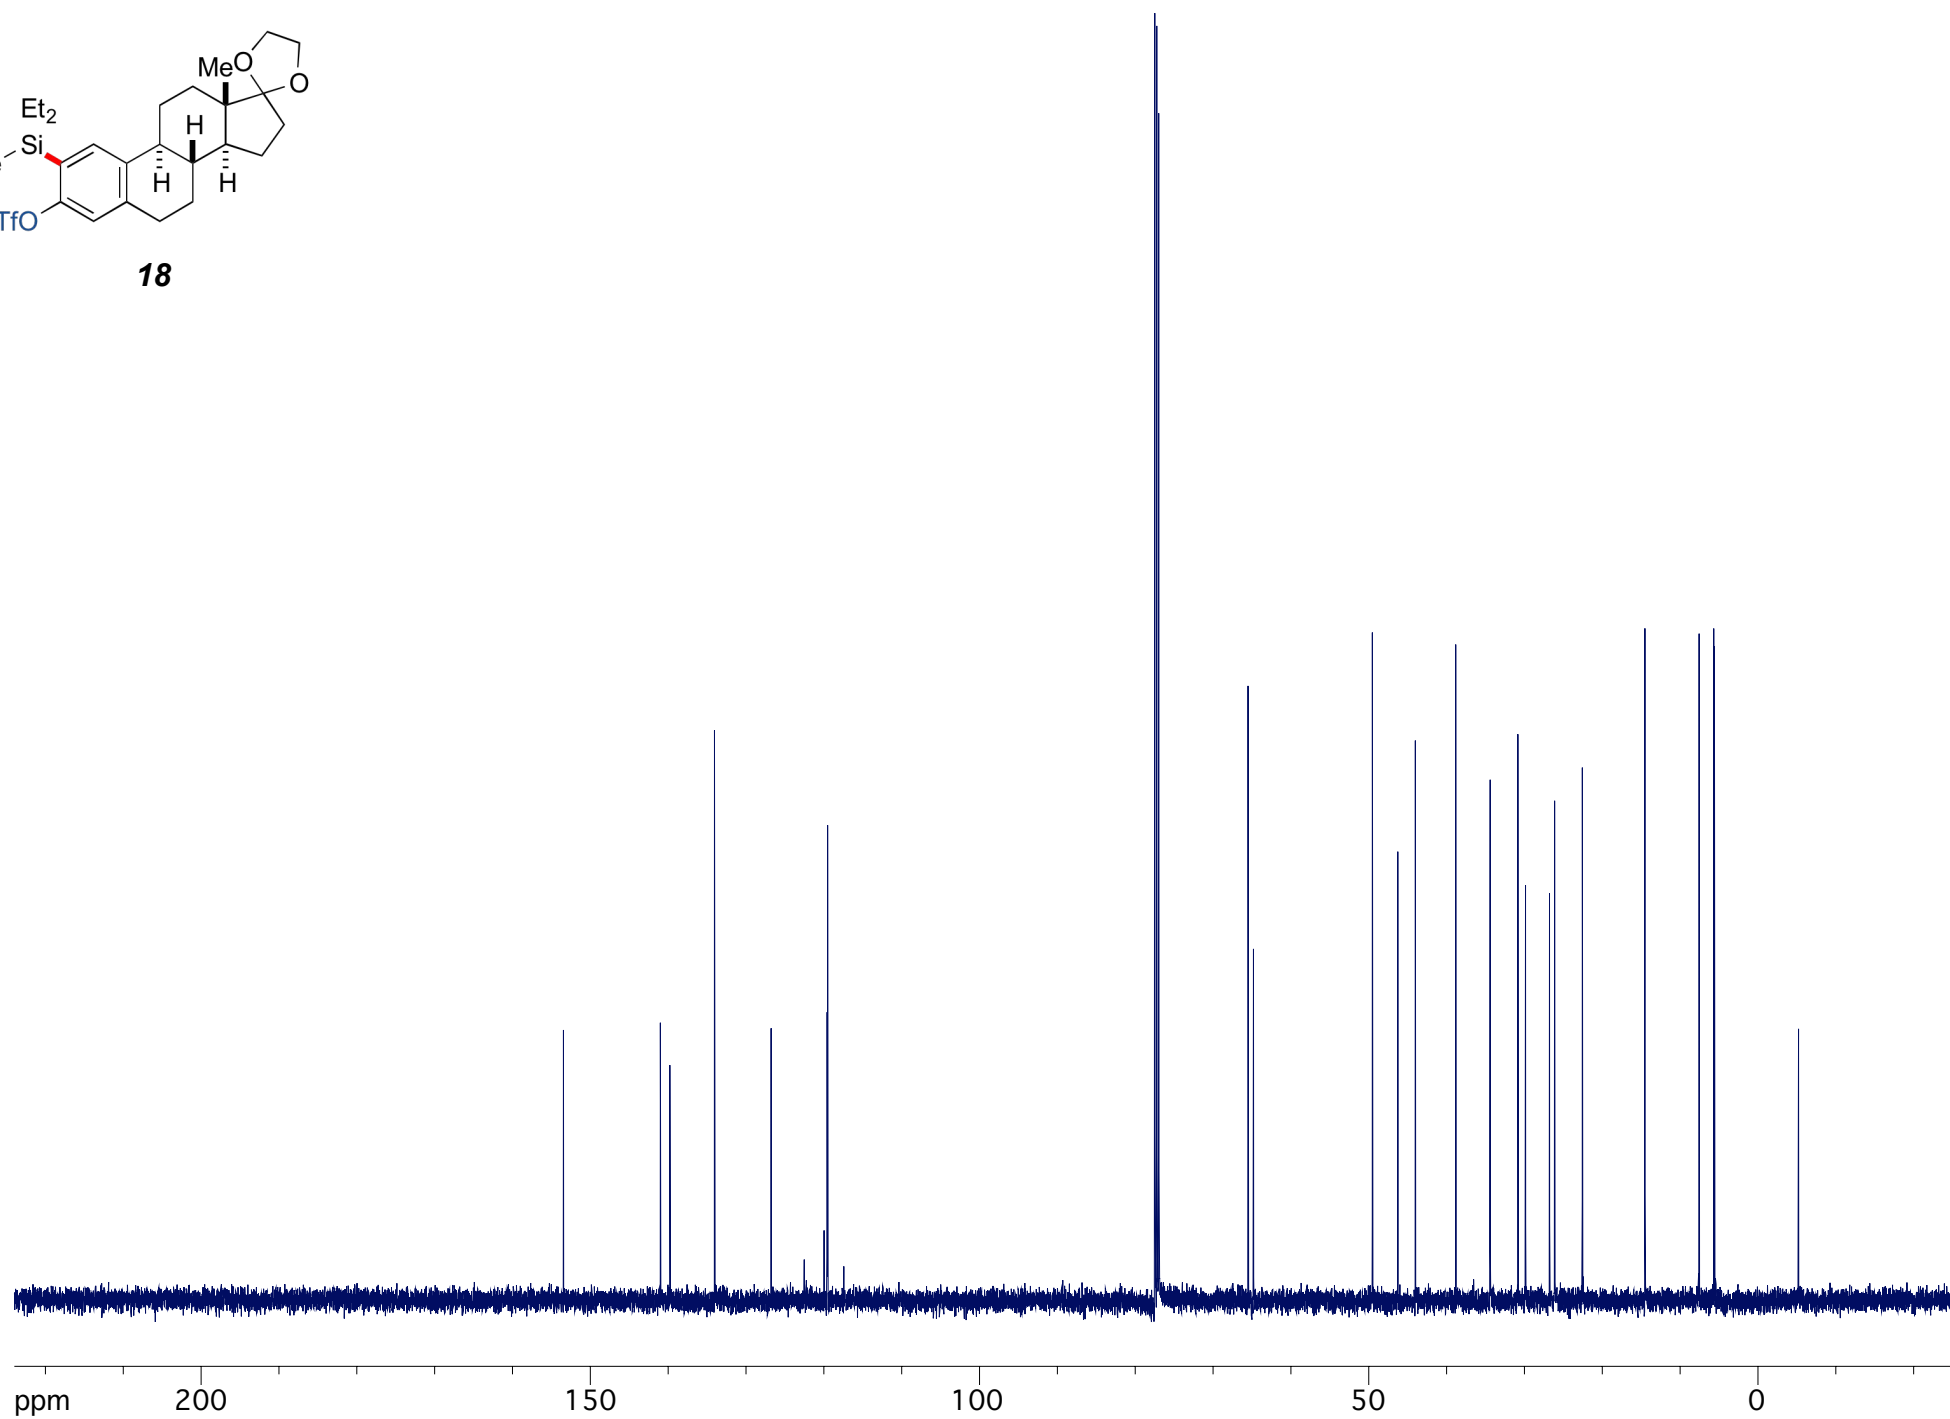

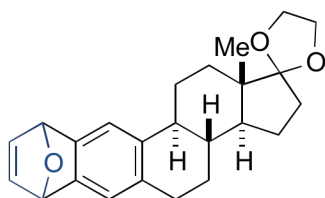**19**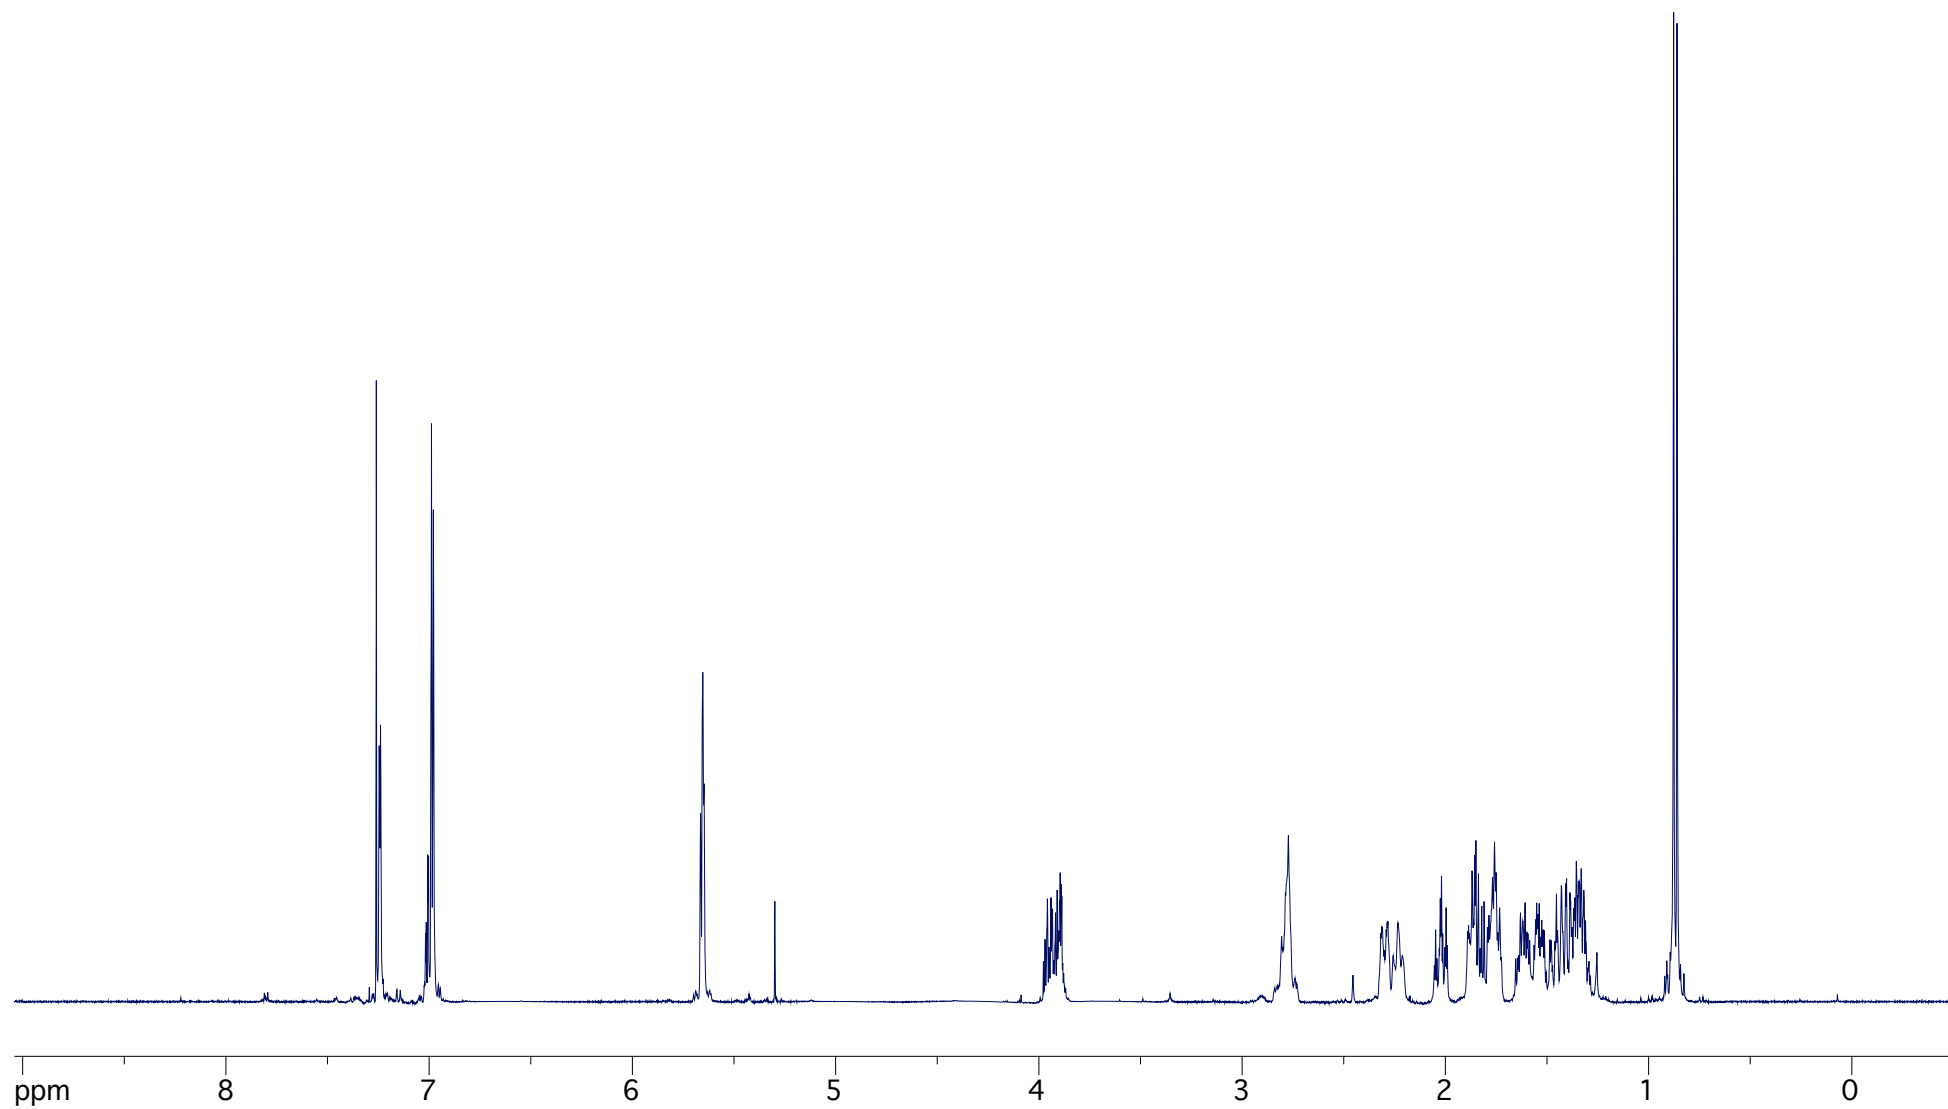



**19**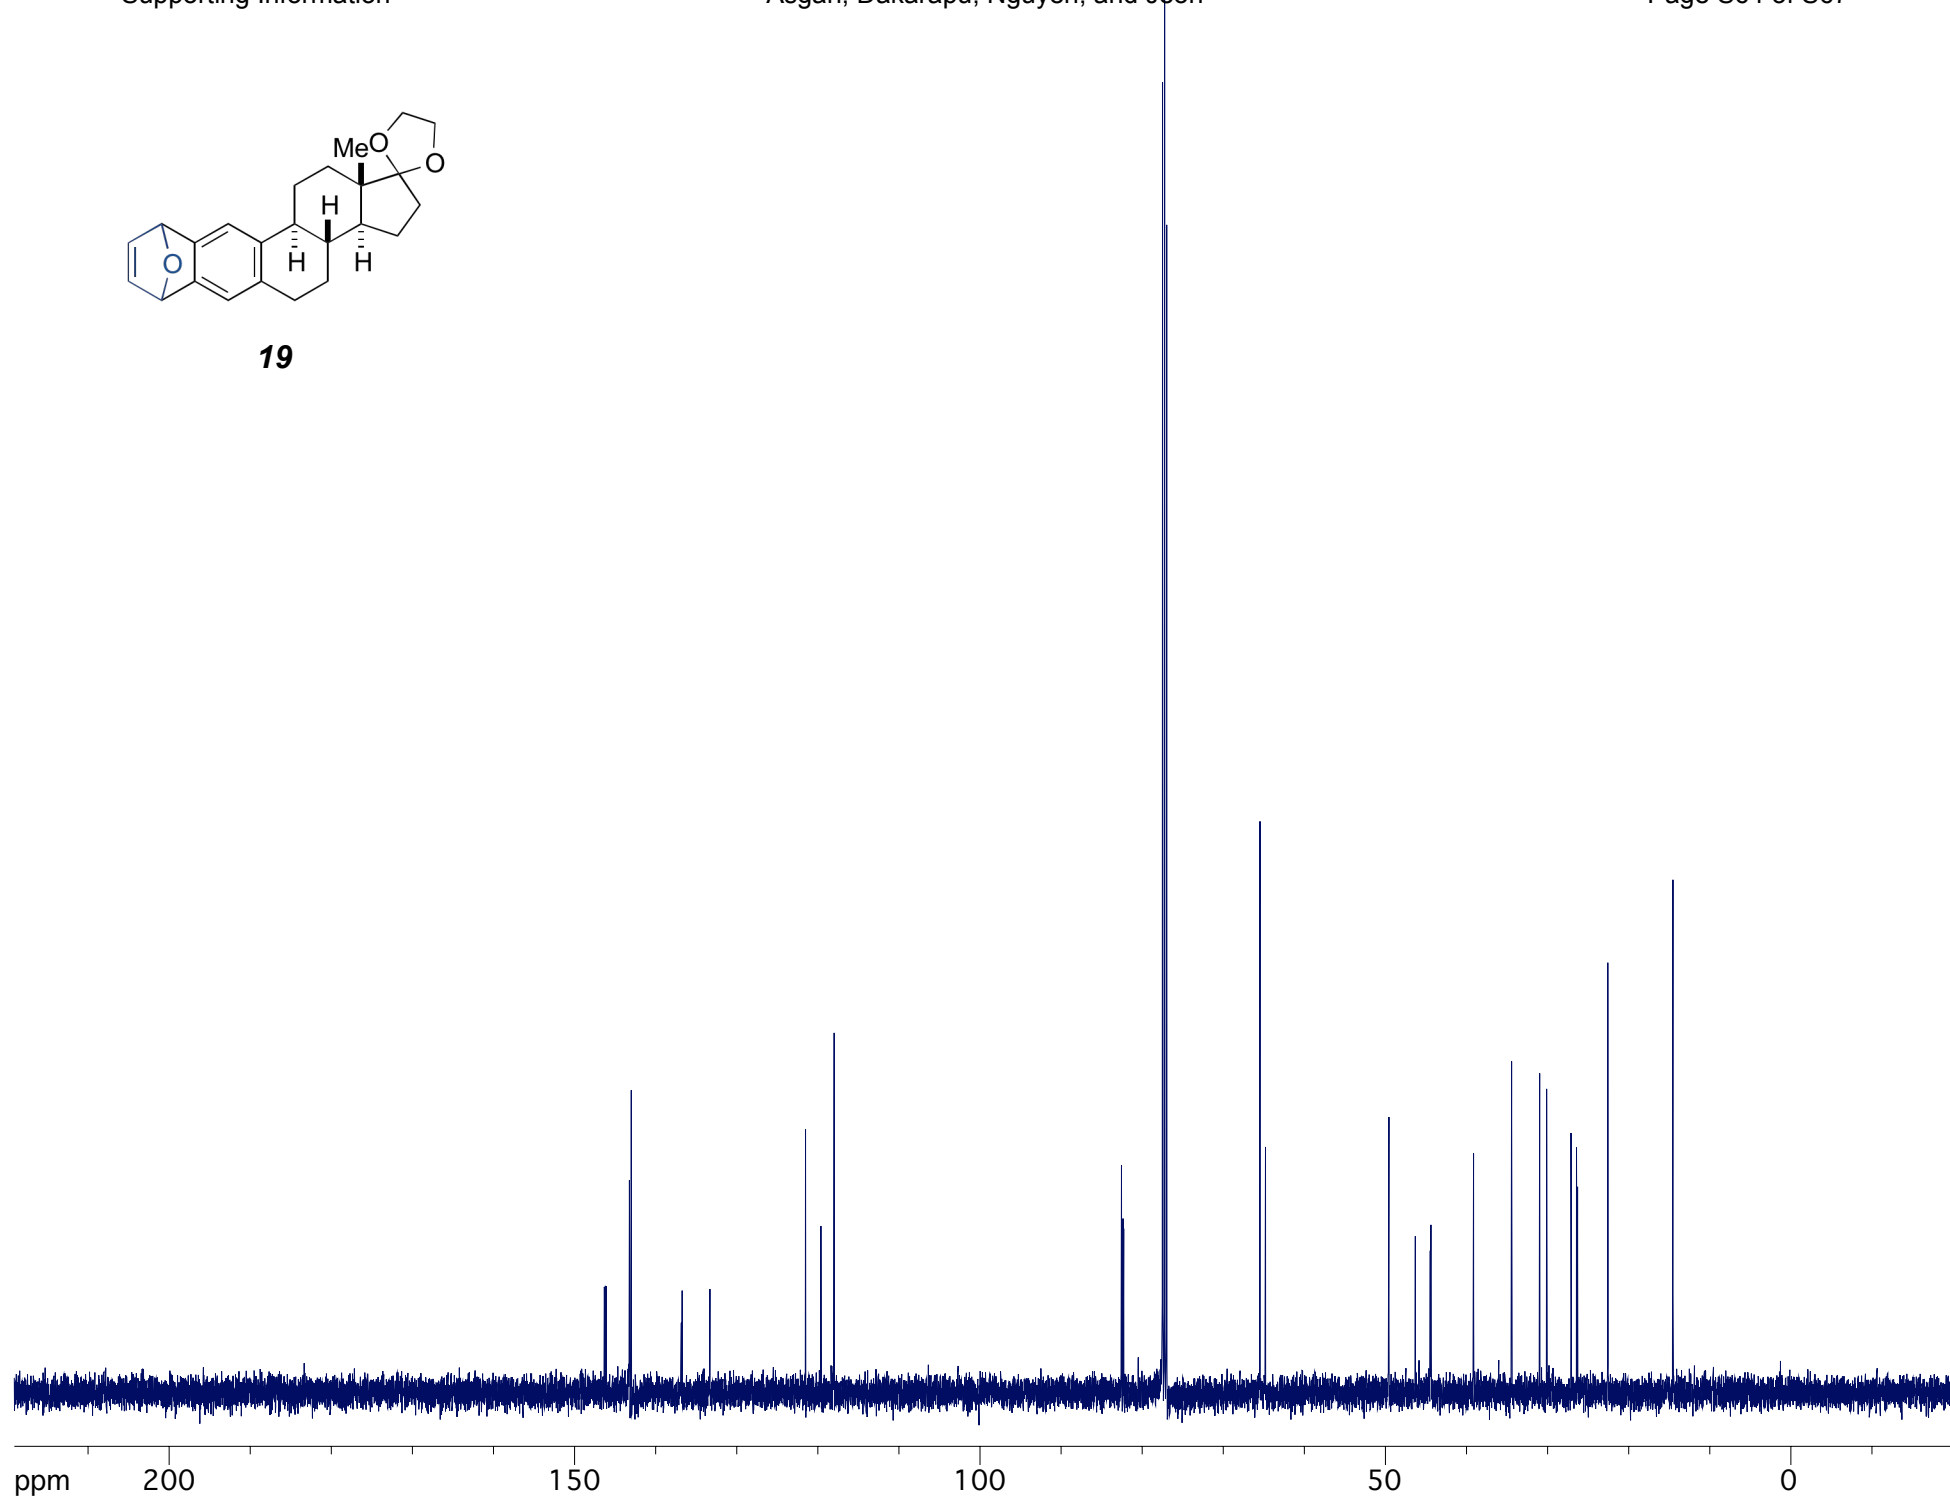

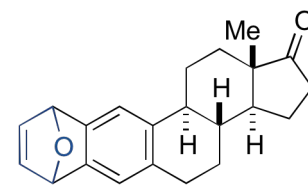**20**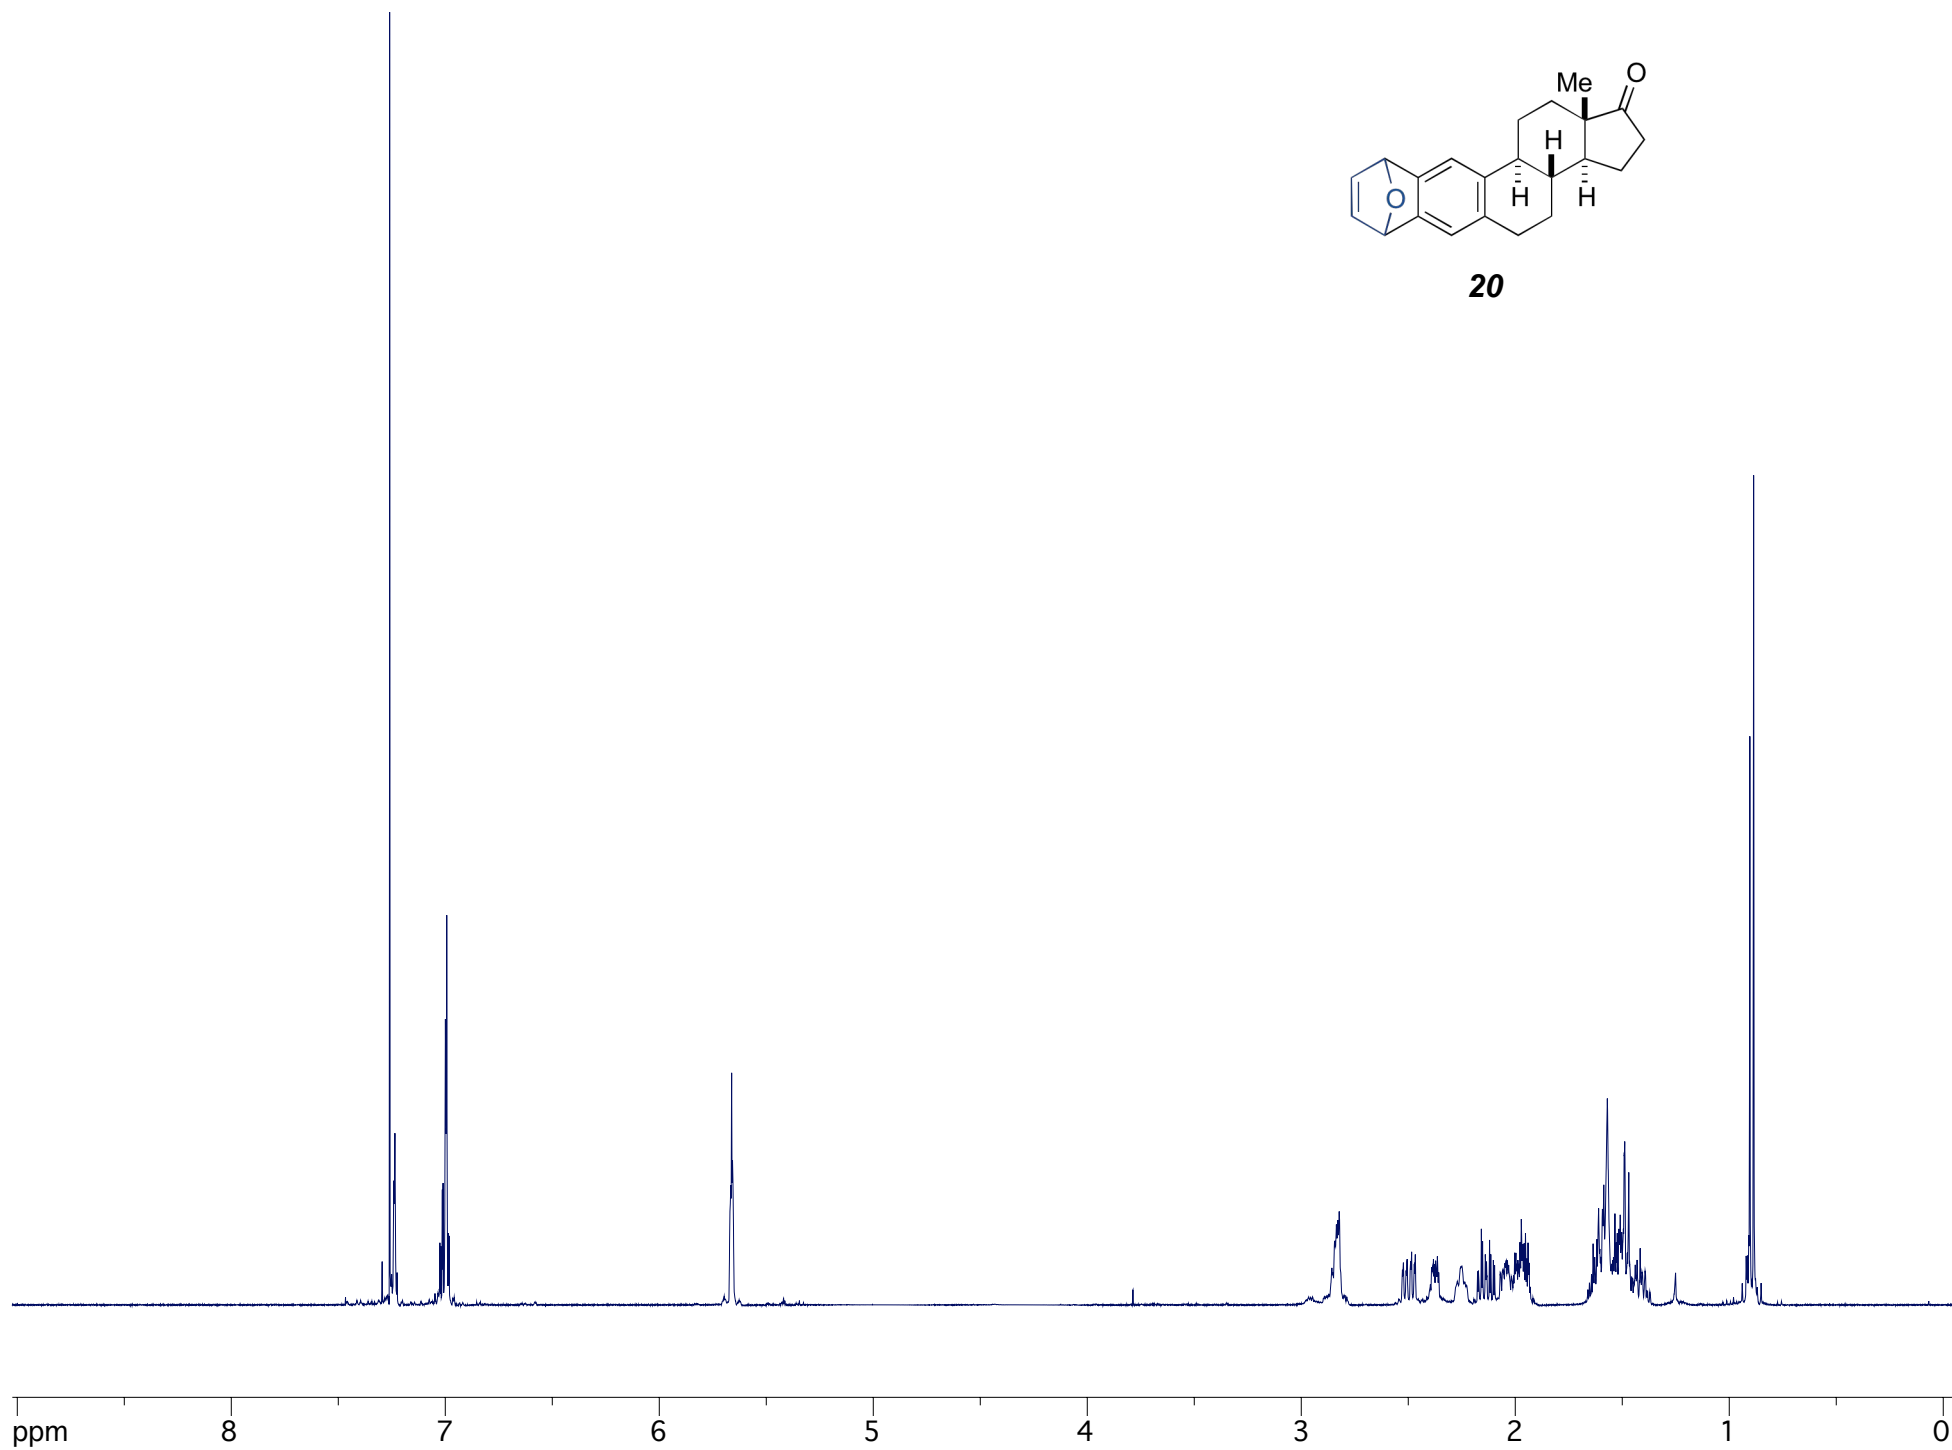

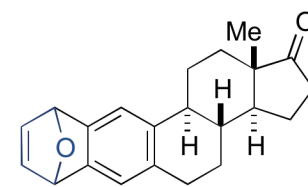**20**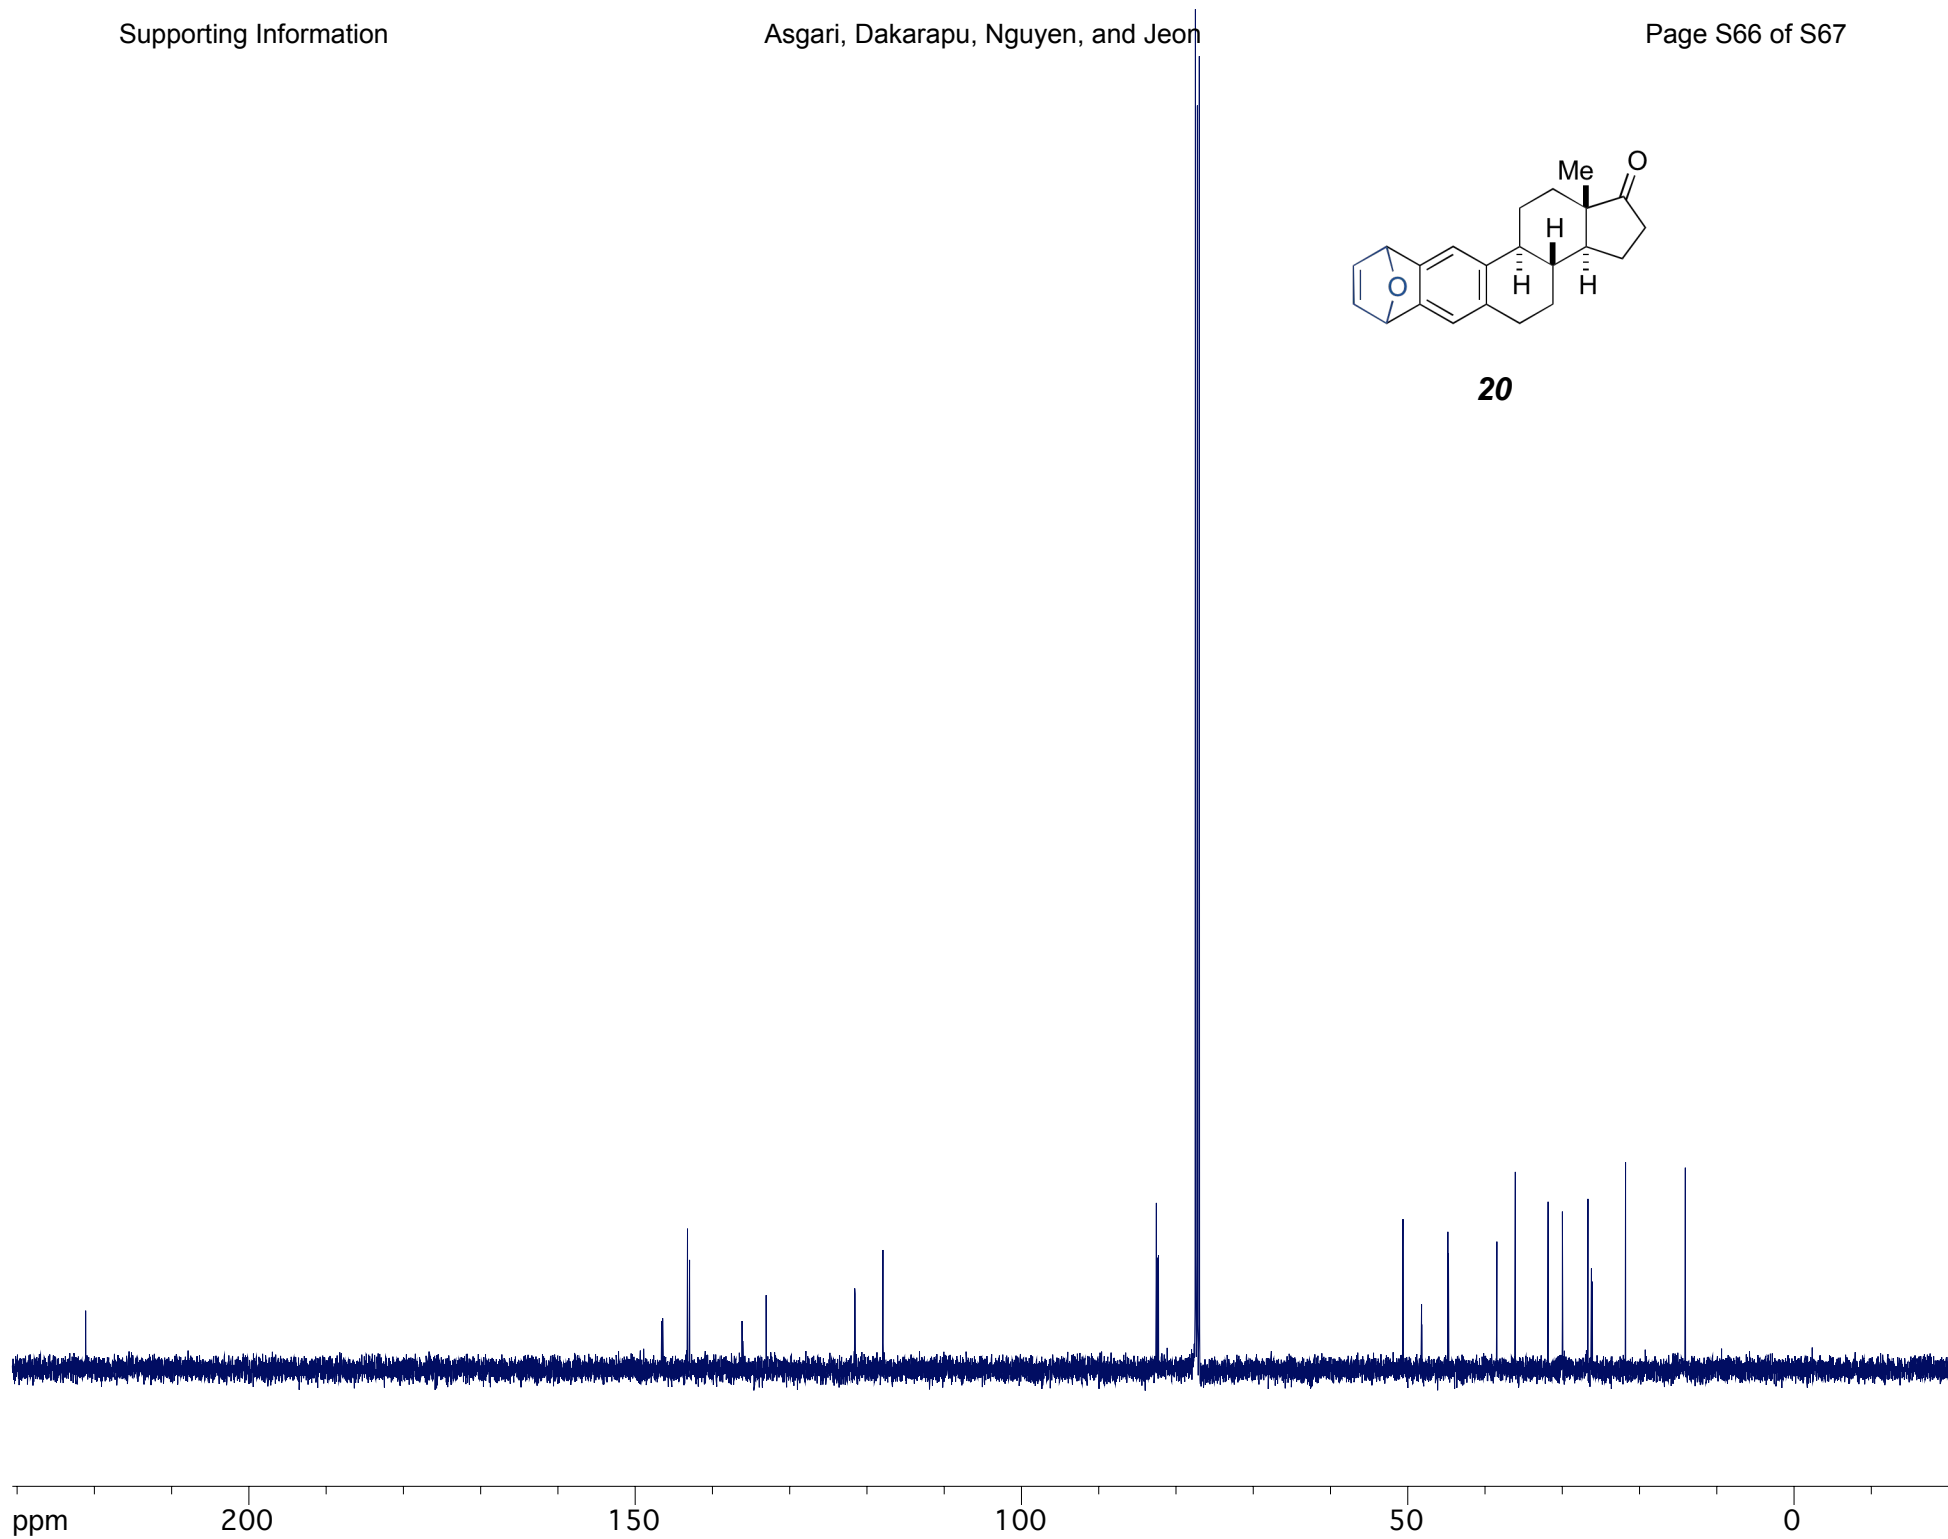

Supplement: NIHMS836503-supplement.pdf [file NIHMS836503-supplement.pdf]
